# Supplementary material
Source: bioRxiv or medRxiv preprint supplement (https://www.biorxiv.org/highwire/filestream/58623/field_highwire_adjunct_files/0/146373-1.pdf)
Supplement: Supplementary file [file 146373-1.pdf]

# Supporting Information

## The Evolutionary Genomics of Grape (*Vitis vinifera* ssp. *vinifera*) Domestication

Yongfeng Zhou<sup>1</sup>, Mélanie Massonnet<sup>2</sup>, Jaleal Sanjak<sup>1</sup>, Dario Cantu<sup>2</sup>, Brandon S. Gaut<sup>1,\*</sup>

### SUPPLEMENTARY TEXT

#### Supplementary Methods:

**Samples and sequencing:** We collected leaf tissue for a total of 13 individuals from 11 *vinifera* cultivars, nine *sylvestris* accessions and one accession of *V. rotundifolia* (subgenus *Muscadinia*) from the USDA grape germplasm collections in Davis, California (Table 1S). For each sample, genomic DNA was extracted from leaf samples with the Qiagen DNeasy plant kit. Paired-end sequencing libraries were constructed with an insert size of 300 bp according to the Illumina library preparation protocols. Libraries were then sequenced using the Illumina HiSeq 2500 platform with  $2 \times 150$ -bp paired reads to a target coverage of 25X. The raw sequencing data have been deposited in the Short Read Archive at NCBI under BioProject ID: PRJNA388292. We also used Illumina raw reads for five other cultivars (1) that were downloaded from the Short Read Archive at NCBI. Altogether we analyzed nine wild accessions and 18 individuals from 14 cultivars, including four Thompson clones and two Zinfandel/Primitivo clones from different geographic regions (Table S1).

**Raw read trimming, alignment, and filtering:** Paired raw sequencing reads were trimmed using Trimmomatic-0.35 (2) to remove adapter sequences and bases when average quality per base dropped below 20 in 4 bp windows. Reads were discarded when they were <60 bases in length or when they were unpaired after trimming. FastQC (<http://www.bioinformatics.babraham.ac.uk/projects/fastqc/>) was used to compute the per-base sequence quality for both the raw data and the filtered data. Trimmed reads were mapped to the *V. vinifera* Pinot Noir PN40024 reference genome (12X) (3) with default parameters implemented in bwa-0.7.12 using the BWA-MEM algorithm (4). Local realignment was performed around indels using RealignerTargetCreator and IndelRealigner implemented in GATK v3.5 (5). To account for the occurrence of PCR duplicates introduced during library construction, we used MarkDuplicates in picard-tools 1.119 (<https://github.com/broadinstitute/picard>) to remove reads with identical external coordinates and insert lengths. Only the read with the highest summed base quality was kept for

downstream analyses. To exclude potential errors caused by repetitive DNA sequences, we removed sites with extremely low (< 4 reads per sample) or high (> 4X reads per sample, where X is the mapping depth; Tables S1) read coverage. We also removed multiply mapped reads.

**SNP Calling, filtering and annotation:** The HaplotypeCaller and GenotypeGVCFs implemented in GATK v3.5 were used for SNP and genotype calling across all samples (5). Four filtering steps were performed to reduce false positives: i) we removed SNPs located in regions not passing all previous filtering criteria; ii) we removed SNPs with more than two alleles in all samples; iii) we assigned genotypes as missing if their quality scores (GQ) were <10; iv) we removed SNPs with more than 75% missing genotypes across all samples.

We determined the functional region (exonic, intronic, and intergenic) in which each mutation occurred using information from the *V. vinifera* genome annotation in Ensembl (version 34). Exonic SNPs were annotated to be synonymous, nonsynonymous and frameshift using the SnpEff version 4.0 (6). Nonsynonymous SNPs were predicted as deleterious or tolerated using the SIFT score (7), as computed in the program SIFT 4G (8). SIFT scores  $\leq 0.05$  were interpreted as deleterious and SIFT scores  $> 0.05$  were considered to be tolerant. To assess consistency, the PROVEAN score (9) was also computed in the Variant Effect Predictor (VEP, <https://github.com/Ensembl/ensembl-vep>) with a default cutoff score <2.5 interpreted as deleterious. Results based on PROVEAN are qualitatively identical to those based on SIFT (Fig. S10). The use of the reference genome is expected to decrease the probability that a cultivar variant (as opposed to a wild variant) returns a low PROVEAN or SIFT score (10). We therefore submitted the outgroup instead of the reference allele to prediction programs (11, 12). We calculated the number of variants per individual or per region as equal to  $2 \times$  homozygous deleterious mutations + heterozygous deleterious mutations (13).

**Population Structure:** To infer population structure, we used the SAMTools model (14) implemented in the program ANGSD v0.912 (15) to generate a BEAGLE file for the subset of the genome that was determined as being variable, based on a likelihood ratio test ( $P < 10^{-6}$ ) (16). Population structure was then inferred using the program NGSadmix (17), using only sites containing <15% of missing data and a minimal quality score of 20 and a minimal mapping quality of 30. We predefined the number of genetic clusters  $K$  from 2 to 6, and the maximum iteration of the Expectation Maximization (EM) algorithm was set to 10,000. We also constructed a neighbor

joining (NJ) tree based on pairwise relatedness (18) estimated using VCFtools v0.1.14 (<https://vcftools.github.io/>).

We also performed principal component analyses (PCA) using ngsTools that accounted for sequencing errors and uncertainty in genotype calls (19). The expected covariance matrix across pairs of individuals in both wild samples and cultivated samples was computed based on the genotype posterior probabilities across all filtered sites. Eigenvectors and eigenvalues from the covariance matrix were generated with the R function `eigen`, and significance levels were determined using the Tracy–Widom test implemented in EIGENSOFT v4.2 (20).

**Linkage disequilibrium and genetic diversity:** For population genomic analyses, we reduced the sample size to avoid sample replication (Table S1), choosing the individual with the least missing data when we had multiple individuals for a given cultivar. To detect outlier regions of genetic differentiation between wine and table grapes, we used the major lineage of wine or table grapes with pure ancestry in population genetic plots (Figure S1; Table S1).

A total of 1,867,225 SNPs and 1,872,156 SNPs with minor allele frequency  $> 0.1$  were used for the analyses of linkage disequilibrium (LD) and population recombination rate ( $\rho = 4N_e r$ , where  $N_e$  is the effective population size and  $r$  is the recombination rate per locus) in the wild and the cultivated population, respectively. LD decay along physical distance were measured by the squared correlation coefficients ( $r^2$ ) between all pairs of SNPs within a physical distance of 300 kbp using PLINK 1.9 (21). The decay of LD against physical distance was estimated using nonlinear regression of pairwise  $r^2$  vs. the physical distance between SNPs (22). The population recombination rate  $\rho$  were computed using the program LDhat 2.2 (23) with 100,000 burn-in iterations, and 1,000,000 MCMC iterations sampling every 2000 iterations and a block penalty parameter of 5. We calculated the scaled value of  $\rho$  in each 100-kbp window with  $> 1000$  SNPs by averaging over all SNPs in that window. Our LD analyses showed decay within 20Kbp in both the wild population and the cultivated population, we therefore use a 20kbp window size in downstream diversity analyses.

To measure genome-wide genetic diversity and allele frequency, we estimated population genetic statistics directly from genotype likelihood without calling genotypes in the software ANGSD v0.912 (15). Only reads with a mapping quality  $> 30$  and bases with a quality score  $> 20$  were considered. We used the `-doSaf` to calculate the site allele frequency likelihood based on the SAMTools genotype likelihood model at all sites (14), and then used the `-realSFS` to obtain a maximum likelihood estimate of the unfolded SFS using the Expectation Maximization (EM)

algorithm (Kim et al. 2011). We then calculated several population genetic statistics, including the number of segregating sites ( $S$ ), Watterson's  $\theta_w$  (24), pairwise nucleotide differences within populations ( $\pi$ ) and between populations ( $D_{xy}$ ) (25), Tajima's  $D$  (26) and Fay and Wu's  $H$  (Fay and Wu 2000).  $F_{ST}$  between wild and cultivated - and between wine and table grapes - were then calculated based on the global SFS from ANGSD. *V. rotundifolia* was used as the outgroup to determine ancestral states.

**Demographic history:** We employed the multiple sequentially Markovian coalescent (MSMC 2.0) (27) to estimate scaled population sizes ( $N_e$ ) over historical time for both the cultivated and the wild samples (28). Only sites with uniquely mapped reads and sites with coverage depths between 0.5-fold and 3-fold the mean depth were used in analyses. The remaining genomic regions were masked using the script bamCaller.py in MSMC tools. Prior to the analysis, all segregating sites within each group were phased and imputed using Shapeit v2.12 (29), based on a genetic map (30). A generation time of 3 years and a mutation rate of  $2.5 \times 10^{-9}$  mutations per nucleotide per year (31) were used to convert the scaled times and population sizes into real times and sizes. Analyses of population sizes change were conducted for eight haplotypes of table grapes and wine grapes, respectively (Table S1). Divergence time were estimated between the wild and the cultivated population (eight individuals from each population) as well as between table grapes and wine grapes (four individuals from each group; Table S1). SMC++ (32) was also employed to jointly infer population size histories and split times between the cultivated and wild samples and between wine and table grapes (see Table S1). Only SNPs that passed all the filtering steps were used in this analysis.

**Genomic signatures of selection:** We found that LD decays primarily within 20 kbp in both the wild and the cultivated populations and thus divided the genome into 23,406 non-overlapping windows of 20 kbp in size to investigate patterns of genomic differentiation and signatures of selection. For a window to be included in the downstream analyses, we required at least 1,000 bases after filtering. Levels of genetic differentiation between species at each site were estimated using the method-of-moments  $F_{ST}$  estimators implemented in ngsFST from the ngsTools package (19), which calculates indices of the expected genetic variance between and within species from posterior probabilities of sample allele frequencies, without relying on SNP or genotype calling (33). We then averaged  $F_{ST}$  values of all sites within each 20 kbp non-overlapping window. As  $F_{ST}$  is confounded by within-population diversity, we also calculated pairwise differences between populations ( $D_{xy}$ ) to

detect genomic islands underlying divergent selection between cultivated samples and wild samples (34). SweeD (35) was used to detect selective sweeps based on the CLR test to detect signatures of artificial selection and natural selection in cultivated samples and wild samples, respectively (36). The XP-CLR test (37) were also employed to compare allele frequency differentiation between populations while using wild samples as a reference to detect selective sweeps in the cultivated samples. The XP-CLR scores were estimated across non-overlapping 200-bp windows that were used to estimate a maximum XP-CLR score across 20-kb segments. The 20-kb segments with the top 0.5% of maximum XP-CLR values were considered significant. The genetic distance between SNPs were estimated by LDhat 2.2 (23) to use as input for XP-CLR.

**Gene expression analysis:** Raw sequencing data were downloaded from the Short Read Archive (NCBI) under accession numbers SRP049306 for berry samples and SRP041212 for flower samples. The data were trimmed using Trimmomatic v.0.36 (Bolger *et al.*, 2014) with the options: LEADING:3 TRAILING:3 SLIDINGWINDOW:10:20 MINLEN:20. Quality-trimmed reads were mapped onto the predicted transcriptome of *V. vinifera* cv. 'PN40024' (version V1 from <http://genomes.cribi.unipd.it/grape/>) using the aligner Bowtie2 v.2.2.6 (38) with parameters: -q -end-to-end -sensitive -no-unal -p 20. Finally, sam2counts.py version 0.91 (<https://github.com/vsbuffalo/sam2counts>) was used to extract mapping counts.

For each dataset (i.e., berries or flowers), read count normalization for genes were performed with DESeq2 (39). This package was also used to process the differential gene expression analysis across types of flowers (i.e. Male vs. Female, Male vs. Hermaphrodite, Female vs. Hermaphrodite), and across berry developmental stages (i.e. End of veraison vs. three other stages; Harvest vs. three other stages). For the flower analyses, the different developmental stages were treated as replicates. To construct hierarchical clustering trees, Pearson's correlation values among genes were calculated using the *cor* function in R software. Prior to calculation, we added 1 to each normalized count value and then log<sub>2</sub>-transformed the normalized counts. Correlation values were converted into distances by subtracting the correlation values from 1; a dendrogram was generated using the *hclust* and *heatmap.2* functions from *gplots* R package (40). In total 539 of 26,665 genes were expressed more highly in females than in males and hermaphrodites; the ratio (0.022) was used in a binomial test to test for enrichment in the sex-determination region.

**Forward Simulations:** Forward in time simulations were carried out using *fwดย11* (<https://github.com/molpopgen/fwdpy11>), a python package for implementing population genetic

models with the fwdpp C++ template library (41). 500 replicate simulations were run for each demographic and mating scheme model. In each replicate, a single population was simulated for  $8 \cdot N_e$  generations to burn-in an equilibrium level of genetic variation. Then the simulation was paused, and the population was copied once for each demographic and mating scheme model. Each population copy was then subjected to the appropriate demographic and mating scheme for the final generations. Specific model parameters are described below. This approach allows for the effects of the models to be isolated easily.

Analysis of the SMC++ results (Fig. 2) lead to the inference that the ancestral effective population size of the grape is  $N_e=4e5$  and that *vinifera* underwent an approximately linear population decline to  $N_e=2e4$  over the course of 30,000 years, or  $g=1e4$  generations. Forward simulations at these population sizes are computationally intensive and unnecessary to illustrate the important qualitative behaviors. Thus, the parameters were scaled such that the ancestral population size was  $N_e=4e3$  with the final population size for  $N_e=2e2$  over the course of  $g=100$  generations.

Three demographic models were simulated (Figure S8): constant population size, a linear population decline from  $N_e=4e3$  to  $N_e=2e2$  over 100 generations, a discrete bottleneck from  $N_e=4e3$  to  $N_e=2e2$  which occurs instantaneously 100 generations in the past and continues with no recovery. In addition, two mating schemes were simulated: strict outcrossing for the whole simulation, and clonal propagation for the final generations. We assume that clonality began at the time of domestication at 8,000 years ago or  $g=2,667$  generations ago. In scaled terms this means we implement clonality for the final 27 generations of the simulation.

The simulations assumed an infinite sites mutation model and random mating, unless otherwise noted. In this model, we do not model a backwards mutation rate. The mutation and recombination rates per base pair were assumed to be  $\mu$  per bp= $2.5e-9$  (31) and  $\rho$  per bp= $5e-10$ , which was based on analysis of our data (Figure S2). The population scaled mutation and recombination parameters per base pair are therefore  $\theta$  bp= $4e-3$  and  $\rho$  bp= $8e-4$ . A total genomic length of 1Mb was modeled by setting  $\theta$  tot= $4000$  and  $\rho$  tot= $800$ . This 1Mb contiguous recombining region was subject to both neutral and unconditionally deleterious mutation assuming that 11/12 (91.7%) of all newly arising mutations are neutral and the remaining 1/12 are deleterious (12). Deleterious mutations affect fitness according to the standard model where the fitness effect of each locus is:  $w=1$ ,  $1+hs$ ,  $1+2s$ , and the fitness of an individual is the product of the effects at each locus. The values of 's' are drawn a negative gamma distribution with mean -0.05 and shape 0.3 (12,

42). Pure additive and recessive selection are modeled by setting  $h=1$  and  $h=0$  respectively (note that  $h=1$  is perfect co-dominance, because homozygotes have fitness of  $1+2s$ ). Genetic load is calculated as  $1-\bar{w}$ , where  $\bar{w}$  is the average population fitness.

## SUPPLEMENTAL TEXT CITATIONS

1. Velasco R *et al.* (2007) A high quality draft consensus sequence of the genome of a heterozygous grapevine variety. *PLoS One* 2(12):e1326.
2. Bolger AM, Lohse M, Usadel B (2014) Trimmomatic: a flexible trimmer for Illumina sequence data. *Bioinformatics* 30(15):2114–2120.
3. Jaillon O *et al.* (2007) The grapevine genome sequence suggests ancestral hexaploidization in major angiosperm phyla. *Nature* 449(7161):463–467.
4. Li H (2014) Toward better understanding of artifacts in variant calling from high-coverage samples. *Bioinformatics* 30(20):2843–2851.
5. DePristo MA *et al.* (2011) A framework for variation discovery and genotyping using next-generation DNA sequencing data. *Nat Genet* 43(5):491–498.
6. Cingolani P *et al.* (2012) A program for annotating and predicting the effects of single nucleotide polymorphisms, SnpEff: SNPs in the genome of *Drosophila melanogaster* strain w1118; iso-2; iso-3. *Fly (Austin)* 6(2):80–92.
7. Kumar P, Henikoff S, Ng PC (2009) Predicting the effects of coding non-synonymous variants on protein function using the SIFT algorithm. *Nat Protoc* 4(7):1073–1081.
8. Vaser R, Adusumalli S, Leng SN, Sikic M, Ng PC (2016) SIFT missense predictions for genomes. *Nat Protoc* 11(1):1–9.
9. Choi Y, Sims GE, Murphy S, Miller JR, Chan AP (2012) Predicting the functional effect of amino acid substitutions and indels. *PLoS One* 7(10):e46688.
10. Lohmueller KE *et al.* (2008) Proportionally more deleterious genetic variation in European than in African populations. *Nature* 451(7181):994–997.
11. Kono TJ *et al.* (2016) The Role of Deleterious Substitutions in Crop Genomes. *Mol Biol Evol*
12. Liu Q, Zhou Y, Morrell PL, Gaut BS (2017) Deleterious Variants in Asian Rice and the Potential Cost of Domestication. *Mol Biol Evol* 34(4):908–924.
13. Henn BM *et al.* (2016) Distance from sub-Saharan Africa predicts mutational load in diverse human genomes. *Proc Natl Acad Sci U S A* 113(4):E440–9.
14. Li H *et al.* (2009) The Sequence Alignment/Map format and SAMtools. *Bioinformatics* 25(16):2078–2079.
15. Korneliussen TS, Albrechtsen A, Nielsen R (2014) ANGSD: Analysis of Next Generation Sequencing Data. *BMC Bioinformatics* 15:356.
16. Kim SY *et al.* (2011) Estimation of allele frequency and association mapping using next-generation sequencing data. *BMC Bioinformatics* 12:231.
17. Skotte L, Korneliussen TS, Albrechtsen A (2013) Estimating individual admixture proportions from next generation sequencing data. *Genetics* 195(3):693–702.
18. Yang J *et al.* (2010) Common SNPs explain a large proportion of the heritability for human height. *Nat Genet* 42(7):565–569.
19. Fumagalli M, Vieira FG, Linderth T, Nielsen R (2014) ngsTools: methods for population genetics analyses from next-generation sequencing data. *Bioinformatics* 30(10):1486–1487.
20. Patterson N, Price AL, Reich D (2006) Population structure and eigenanalysis. *PLoS Genet*

- 2(12):e190.
21. Purcell S *et al.* (2007) PLINK: a tool set for whole-genome association and population-based linkage analyses. *Am J Hum Genet* 81(3):559–575.
  22. Hill WG, Robertson A (1968) Linkage disequilibrium in finite populations. *Theor Appl Genet* 38:226–231.
  23. McVean GA *et al.* (2004) The fine-scale structure of recombination rate variation in the human genome. *Science* 304(5670):581–584.
  24. Watterson GA (1975) On the number of segregating sites in genetical models without recombination. *Theor Popul Biol* 7(2):256–276.
  25. Nei M (1987) *Molecular Evolutionary Genetics* (Columbia University Press, New York, NY).
  26. Tajima F (1989) Statistical method for testing the neutral mutation hypothesis by DNA polymorphism. *Genetics* 123:585–595.
  27. Li H, Durbin R (2011) Inference of human population history from individual whole-genome sequences. *Nature* 475(7357):493–496.
  28. Schiffels S, Durbin R (2014) Inferring human population size and separation history from multiple genome sequences. *Nat Genet* 46(8):919–925.
  29. Delaneau O, Zagury JF, Marchini J (2013) Improved whole-chromosome phasing for disease and population genetic studies. *Nat Methods* 10(1):5–6.
  30. Hyma KE *et al.* (2015) Heterozygous Mapping Strategy (HetMappS) for High Resolution Genotyping-By-Sequencing Markers: A Case Study in Grapevine. *PLoS One* 10(8):e0134880.
  31. Koch MA, Haubold B, Mitchell-Olds T (2000) Comparative evolutionary analysis of chalcone synthase and alcohol dehydrogenase loci in Arabidopsis, Arabis, and related genera (Brassicaceae). *Mol Biol Evol* 17(10):1483–98.
  32. Terhorst J, Kamm JA, Song YS (2017) Robust and scalable inference of population history from hundreds of unphased whole genomes. *Nat Genet* 49(2):303–309.
  33. Fumagalli M *et al.* (2013) Quantifying population genetic differentiation from next-generation sequencing data. *Genetics* 195(3):979–992.
  34. Cruickshank TE, Hahn MW (2014) Reanalysis suggests that genomic islands of speciation are due to reduced diversity, not reduced gene flow. *Mol Ecol* 23(13):3133–3157.
  35. Pavlidis P, Zivkovic D, Stamatakis A, Alachiotis N (2013) SweeD: likelihood-based detection of selective sweeps in thousands of genomes. *Mol Biol Evol* 30(9):2224–2234.
  36. Nielsen R *et al.* (2005) Genomic scans for selective sweeps using SNP data. *Genome Res* 15(11):1566–1575.
  37. Chen H, Patterson N, Reich D (2010) Population differentiation as a test for selective sweeps. *Genome Res* 20(3):393–402.
  38. Langmead B, Salzberg SL (2012) Fast gapped-read alignment with Bowtie 2. *Nat Methods* 9(4):357–359.
  39. Love MI, Huber W, Anders S (2014) Moderated estimation of fold change and dispersion for RNA-seq data with DESeq2. *Genome Biol* 15(12):550.
  40. Warnes GR *et al.* (2009) gplots: Various R programming tools for plotting data. *R package version 2:4*.
  41. Thornton KR (2014) A C++ template library for efficient forward-time population genetic simulation of large populations. *Genetics* 198(1):157–166.
  42. Arunkumar R, Ness RW, Wright SI, Barrett SC (2015) The evolution of selfing is accompanied by reduced efficacy of selection and purging of deleterious mutations. *Genetics* 199(3):817–829.



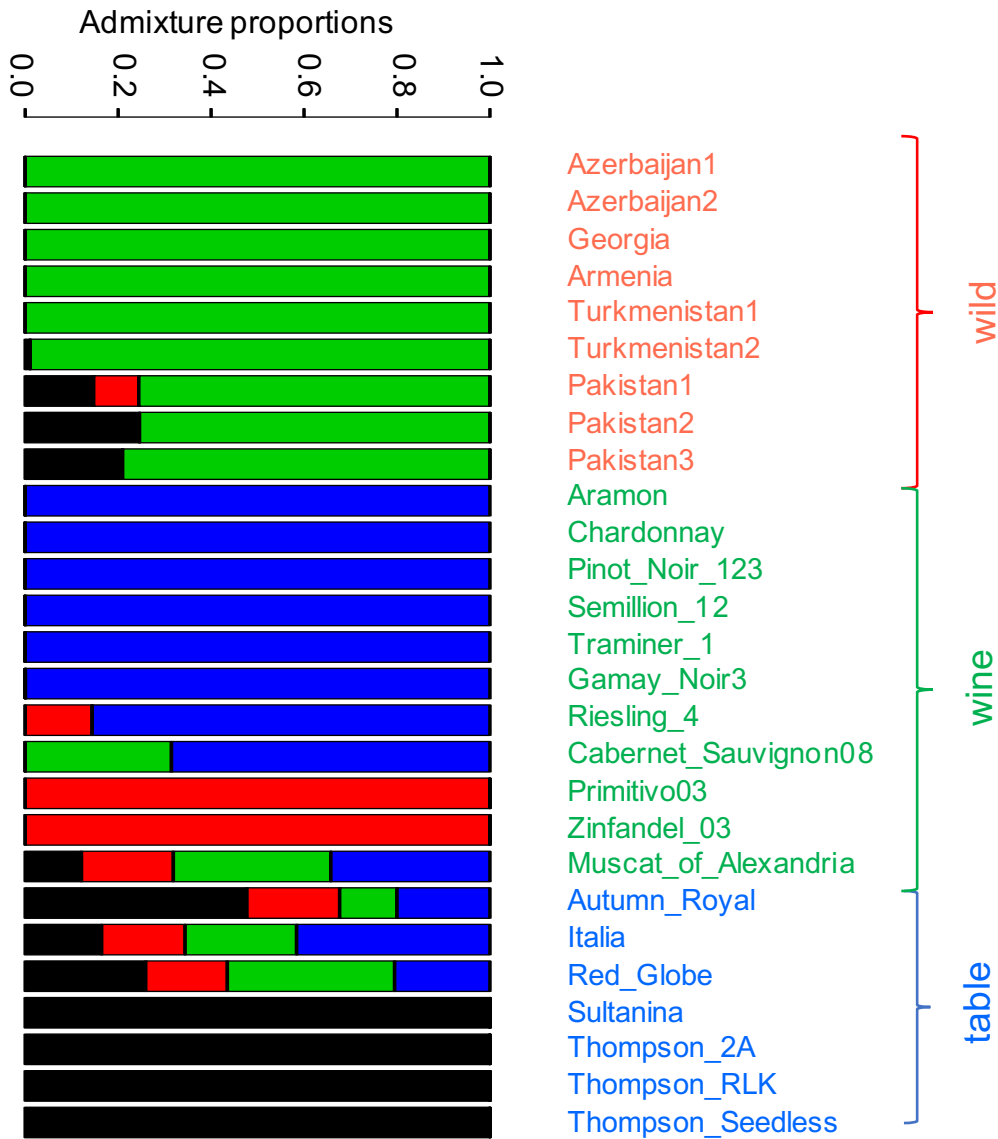

**Figure S1.** Population structure of cultivars and wild samples. Population genetic structure of wild samples and cultivars inferred using NGSadmix with number of ancestral clusters  $K = 4$ . The  $x$ -axis quantifies subgroup membership, and the  $y$ -axis shows the sample ID for each individual grouped into wild, wine, and table grapes.

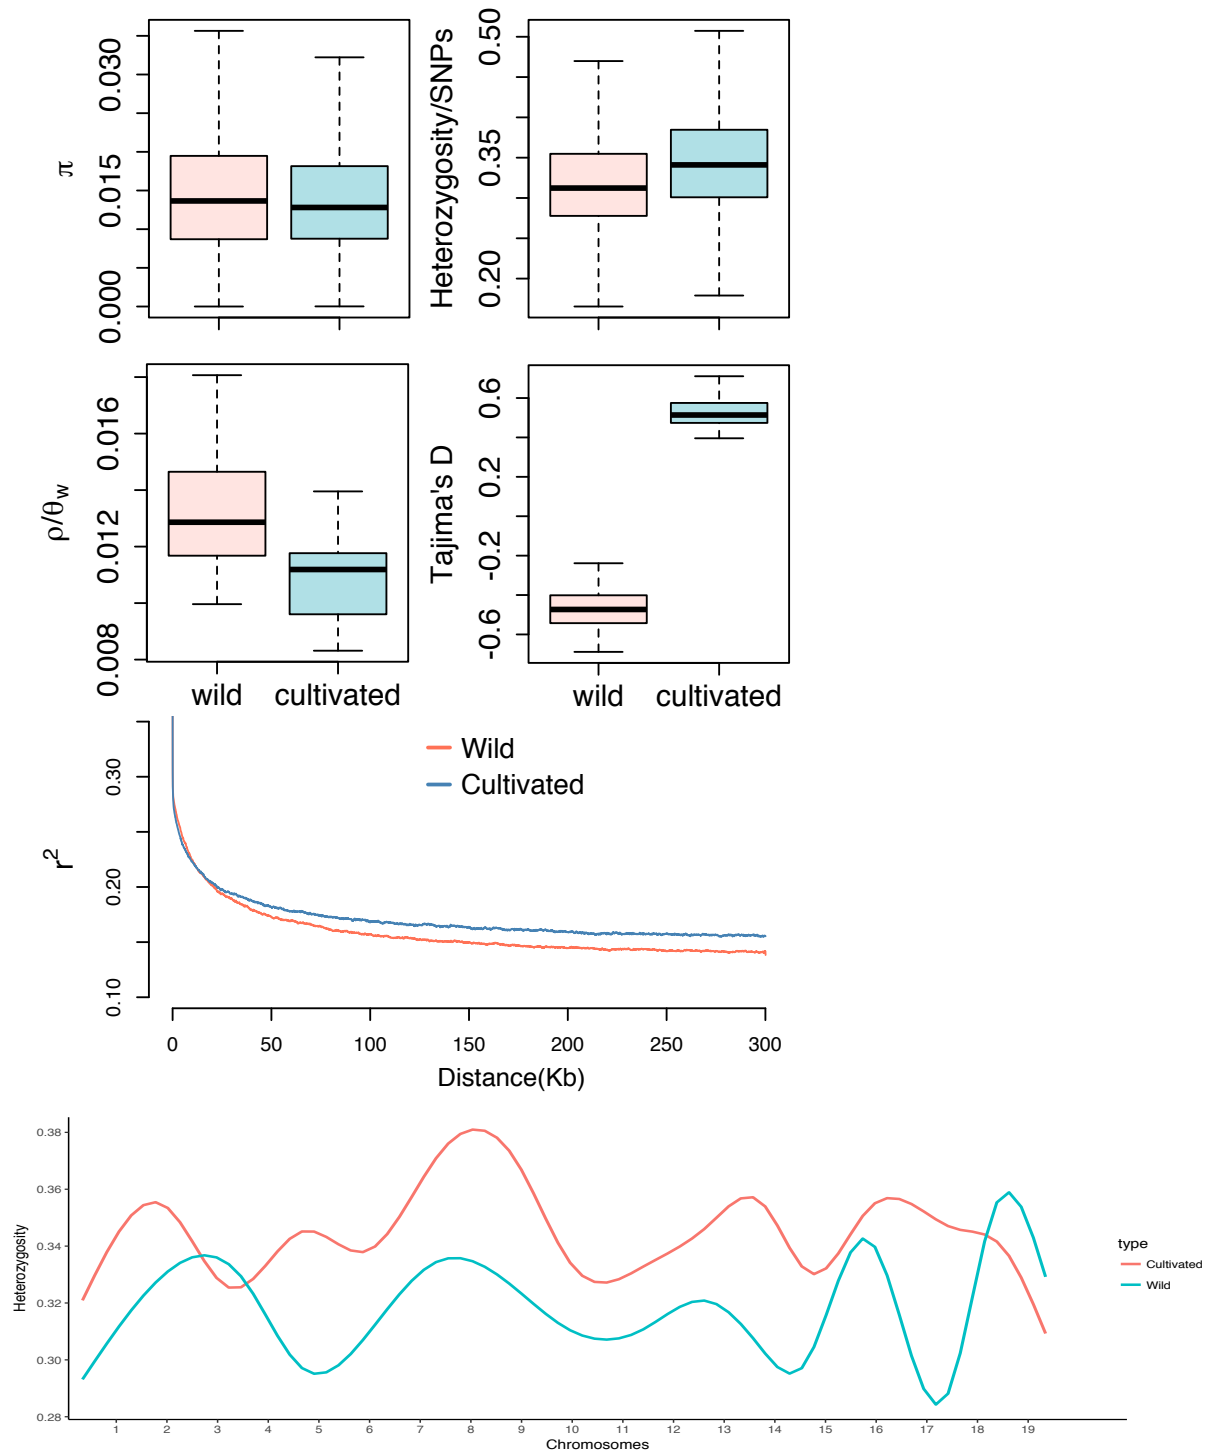

**Figure S2.** Comparison of levels of nucleotide diversity, recombination, LD and heterozygosity between the wild samples and the cultivars. Top box plots illustrate pairwise differences ( $\pi$ ), Heterozygosity/SNP, the ratio of population recombination rate to population mutation rate ( $\rho/\theta_w$ ), Tajima's  $D$  between *vinifera* and *sylvestris*. The middle graph illustrates LD decay as measured by the squared correlation coefficients ( $r^2$ ) between all pairs of SNPs. The bottom graphs illustrate heterozygosity for wild and cultivated samples along chromosomes.

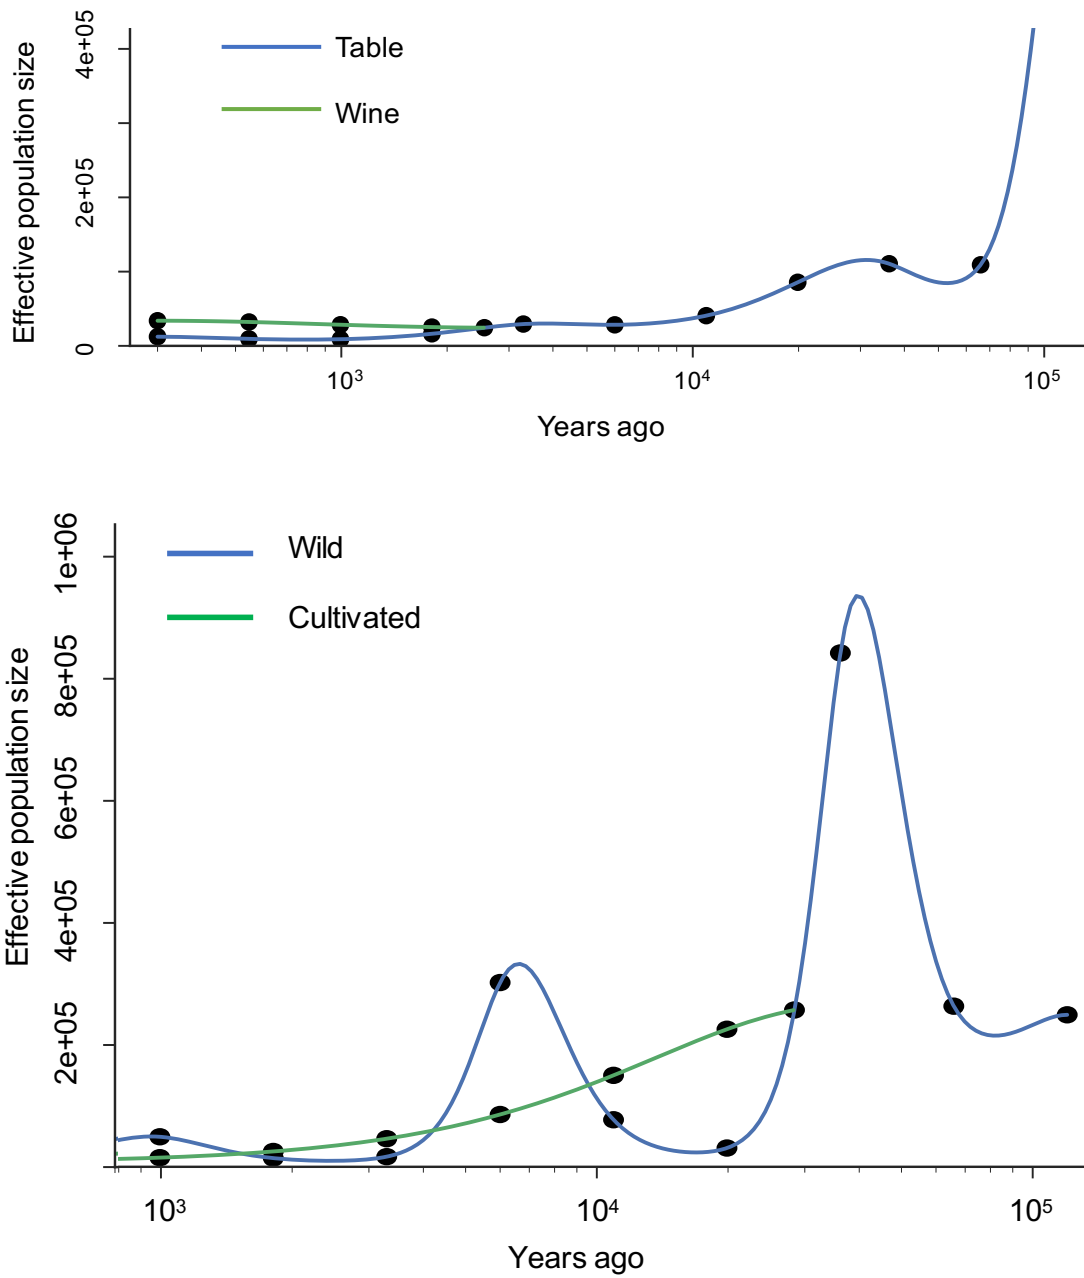

**Figure S3.** Results of the SMC++ analyses between wine and table grapes dated the divergence at  $\sim 2.6$  Kya (upper), and between wild samples and cultivars with the selective sweep regions masked in both taxa (lower). The masked sweep regions were based on CLR analyses.

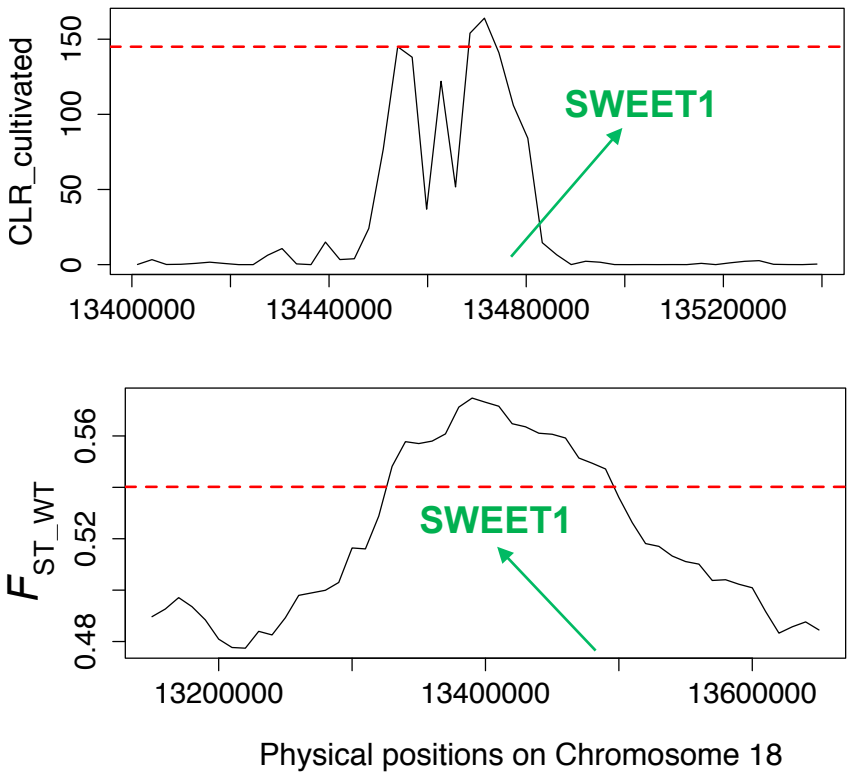

**Figure S4.** The *SWEET1* gene (a bidirectional sugar transporter) is located within an inferred sweep region based on CLR analysis of *vinifera* (top) and is also evident in an  $F_{ST}$  analysis between wine and table grapes (bottom).

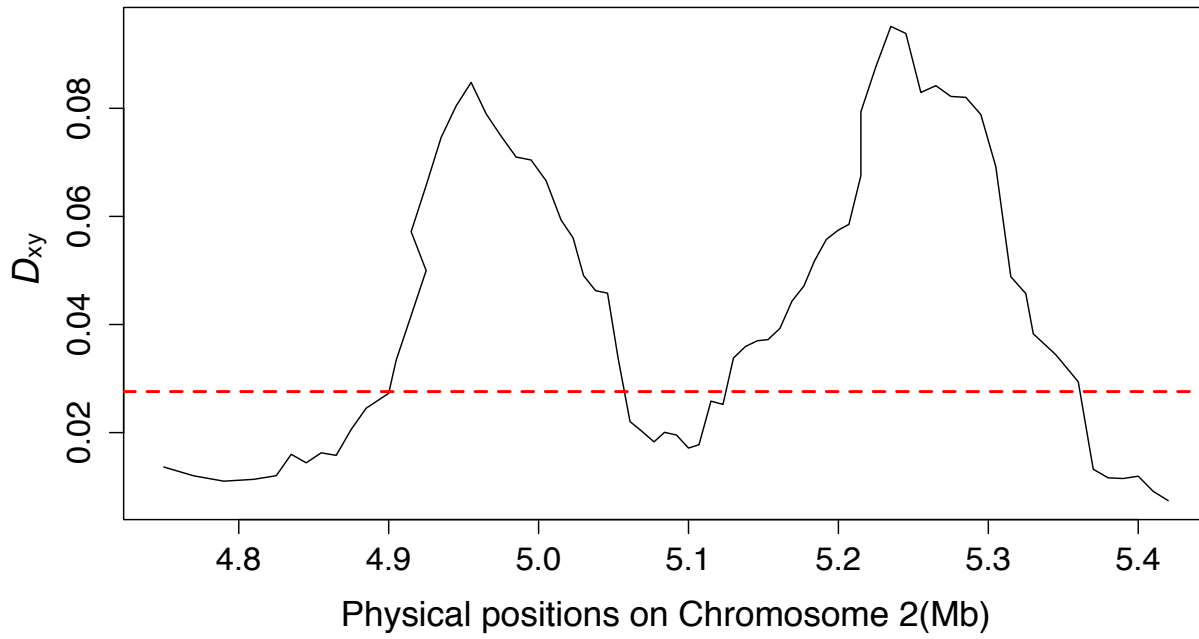

**Figure S5.** Pairwise difference ( $D_{xy}$ ) between *vinifera* and *sylvestris* identified two peaks in the sex determination region on Chromosome 2.

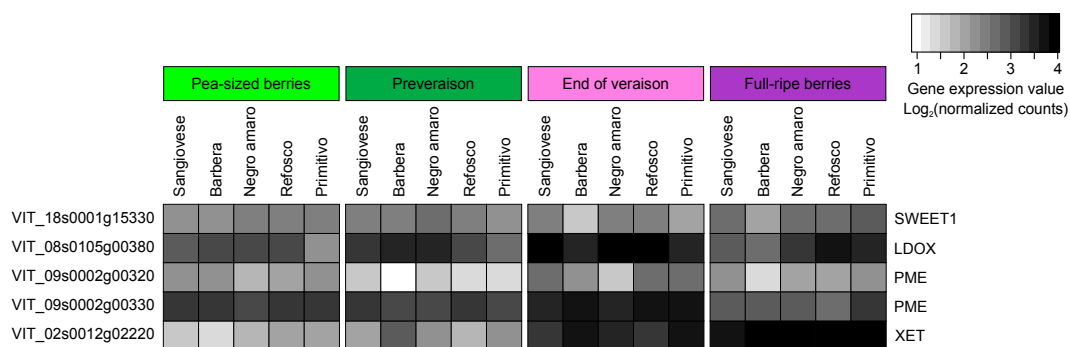

**Figure S6.** Heat map of selected *vinifera* candidate-selected genes during berry development in five red cultivars (Palumbo *et al.*, 2014). Heat map depicts the log<sub>2</sub>-transformed of the normalized read counts (average of the three biological replicates) of the sugar transporter gene *SWEET1*, a leucoanthocyanidin dioxygenase (*LDOX*) gene, two pectinesterase (*PME*) genes and a xyloglucan endotransglucosylase/hydrolase (*XET*) gene.

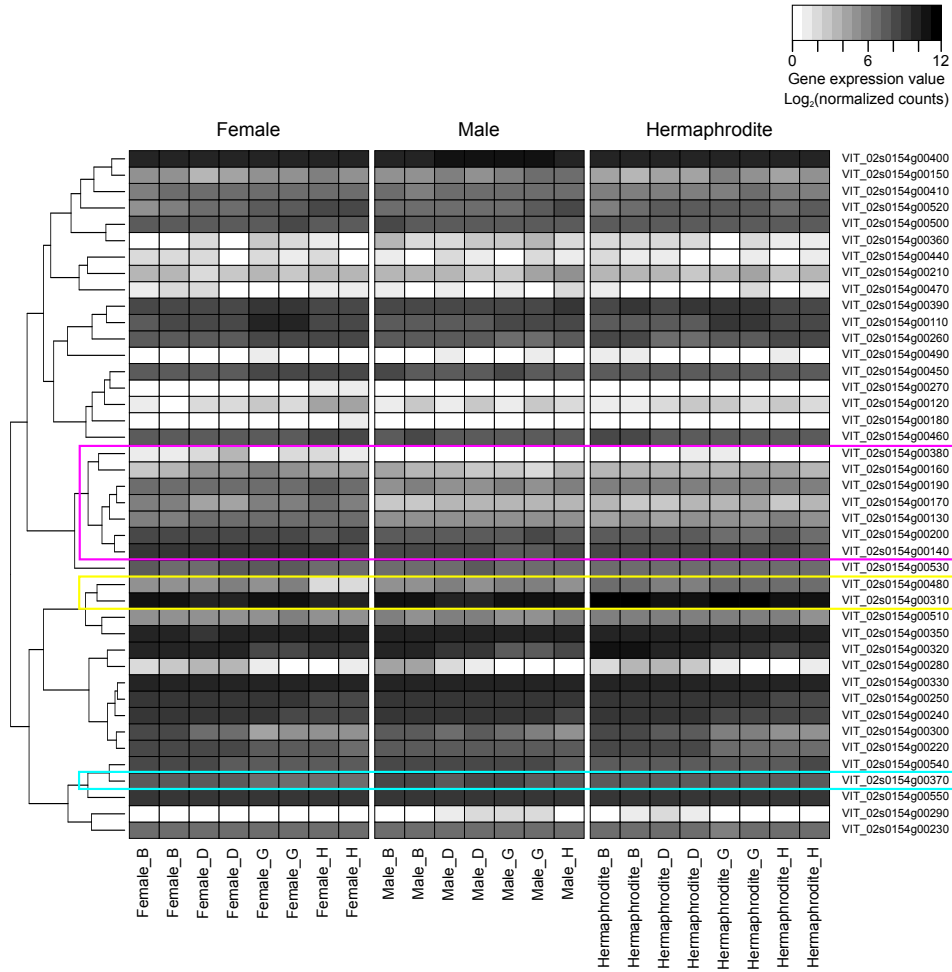

**Figure S7.** Hierarchical clustering heat map of the sex determination region genes in female, male and hermaphrodite flowers (Ramos *et al.*, 2014). Pink, blue and yellow frames shows genes overexpressed in female, male and hermaphrodite flowers respectively.

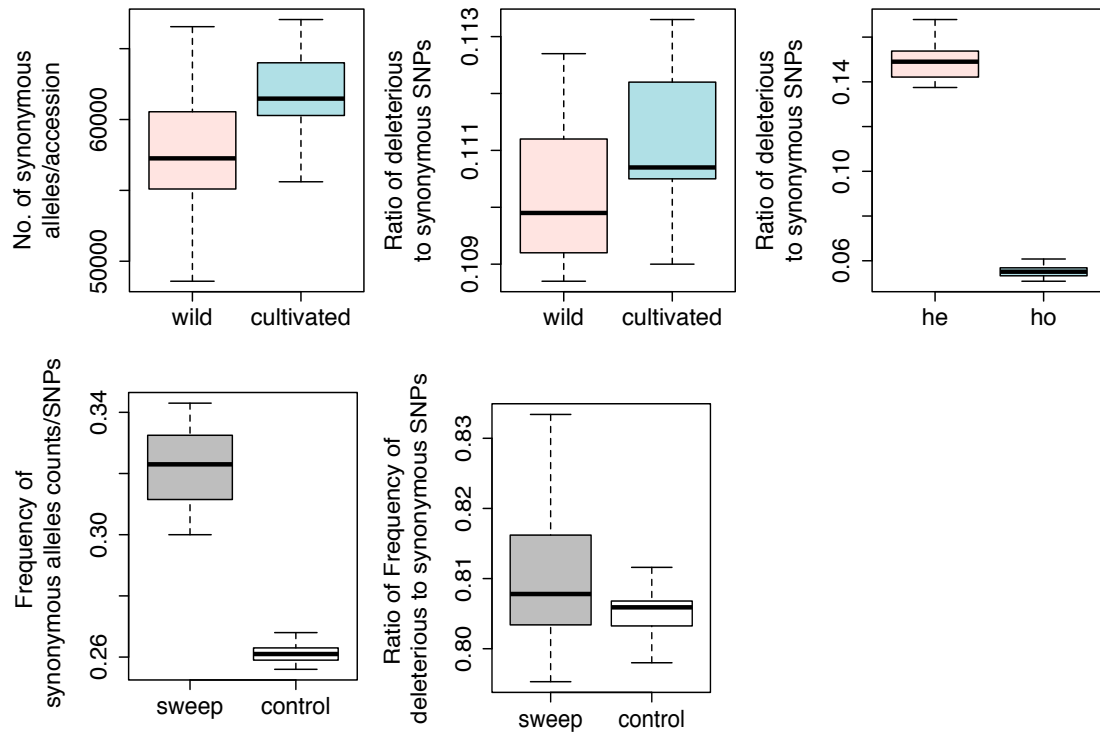

**Figure S8.** Number and Frequency of deleterious alleles between wild and cultivated grapes, and between sweep regions and control regions in *vinifera*, based on SIFT predictions.



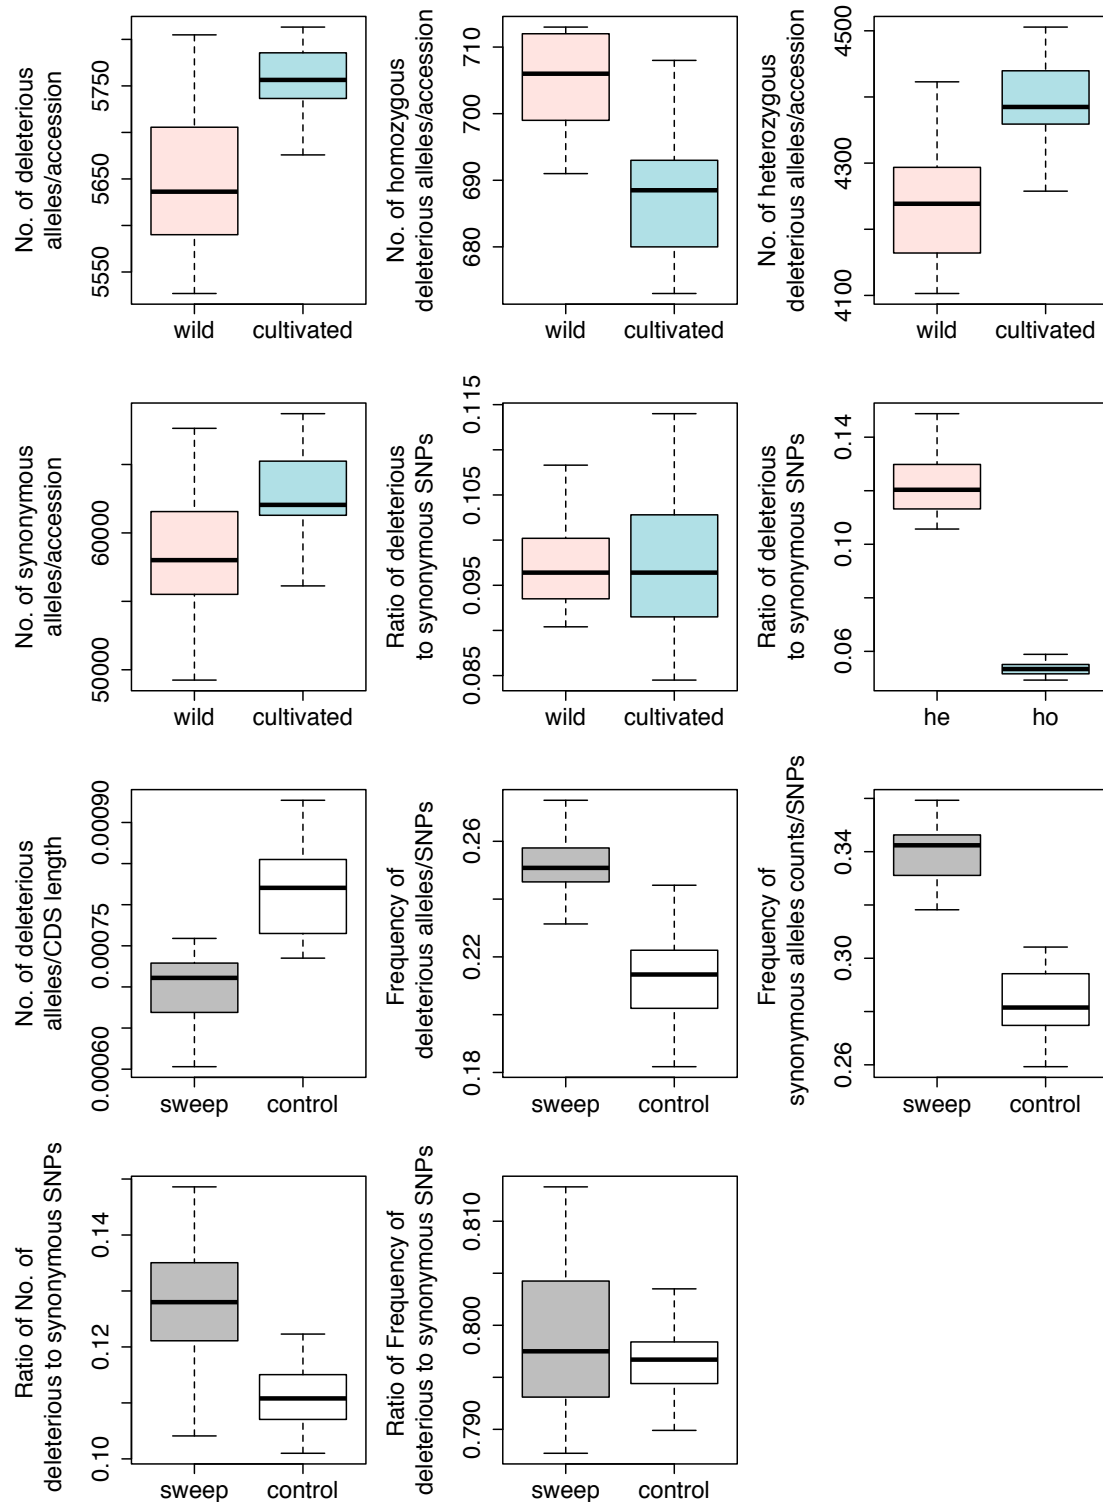

**Figure S9.** Number and Frequency of deleterious alleles between wild and cultivated grapes, and between sweep regions and regions in *vinifera* using the PROVEAN method.

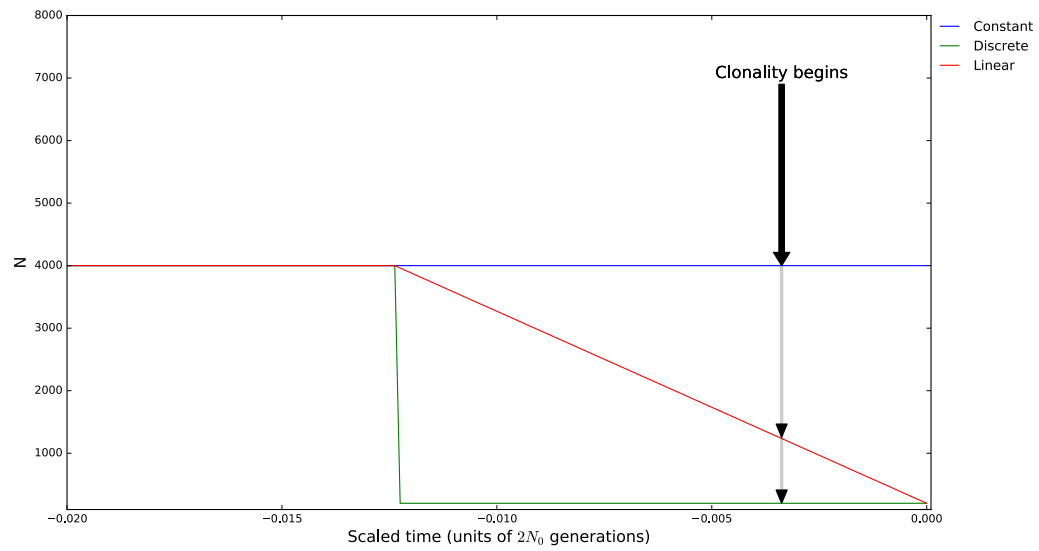

**Figure S10.** The model used in forward simulations over time under three demographic scenarios and two mating systems. Demographic shifts were scaled to  $\sim 30,000$  years and clonality to  $\sim 8,000$  years, roughly the expected time of domestication.

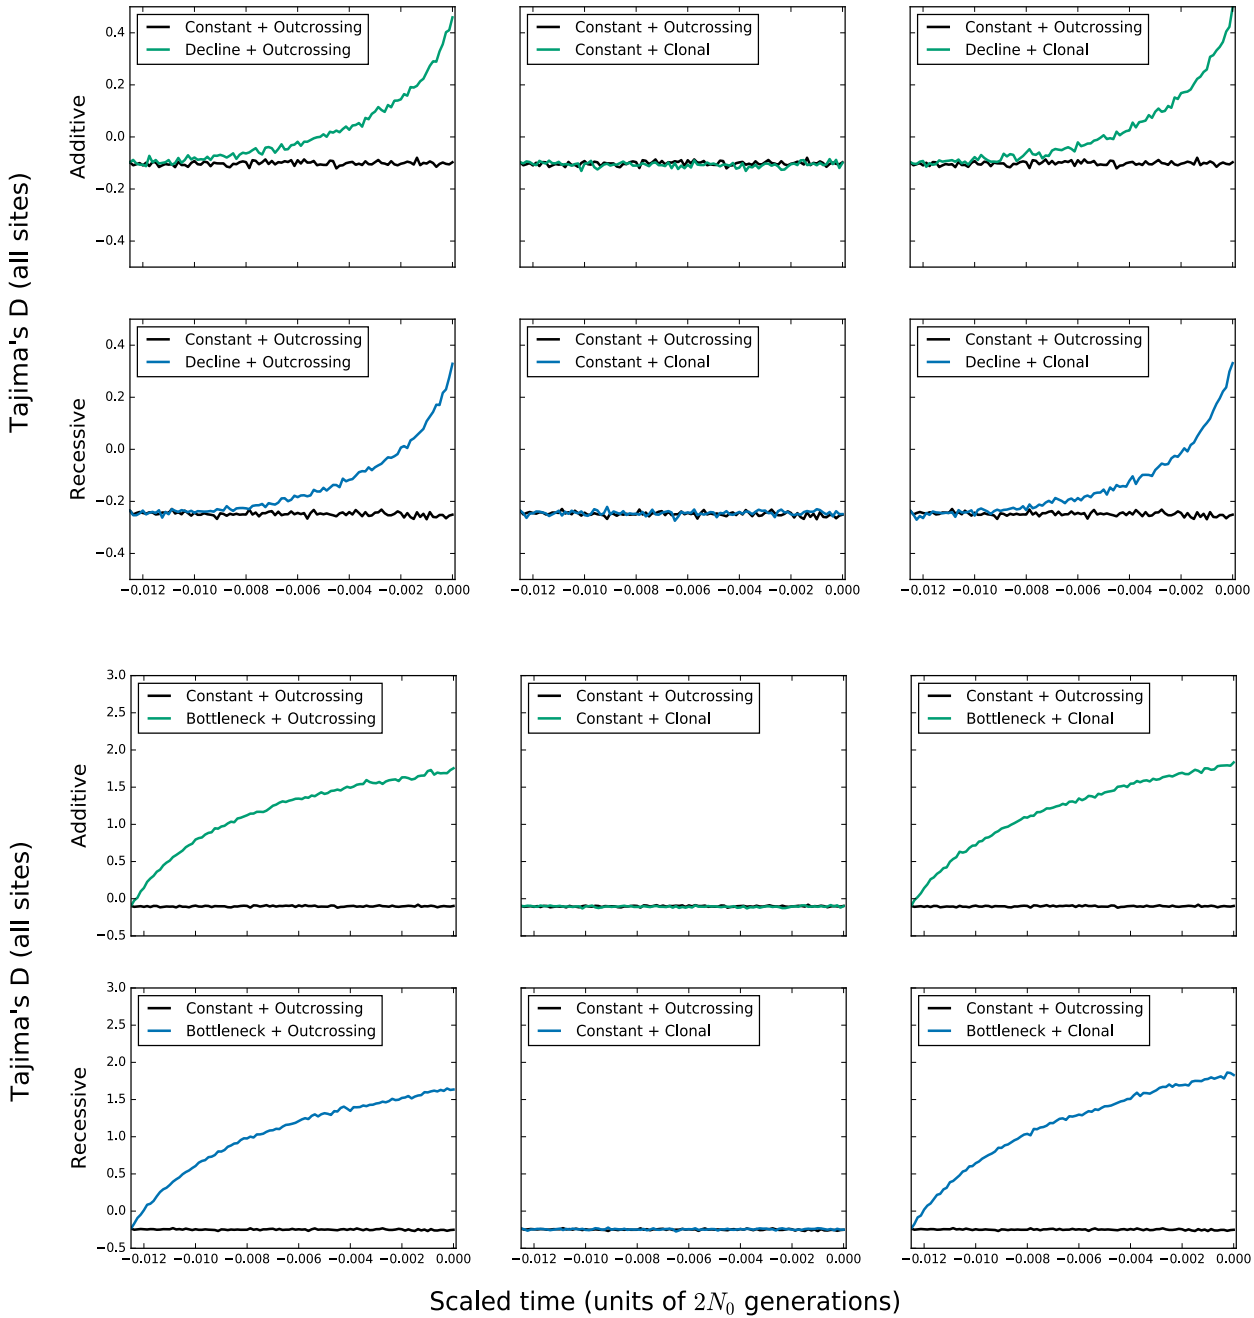

**Figure S11.** Tajima's  $D$  statistic over time for models with a linear population decline and/or clonal propagation (upper six plots), and a discrete population bottleneck and/or clonal propagation (lower six plots). Tajima's  $D$  was calculated using all segregating sites in a sample of 100 diploid individuals. Data are displayed as the mean plus or minus the standard error over 500 replicate simulations, based on a total genomic length of 10kb. The upper row shows the results for additive selection, while the lower row shows the results for recessive selection. In each panel, the model with a constant population size and outcrossing is shown for reference.

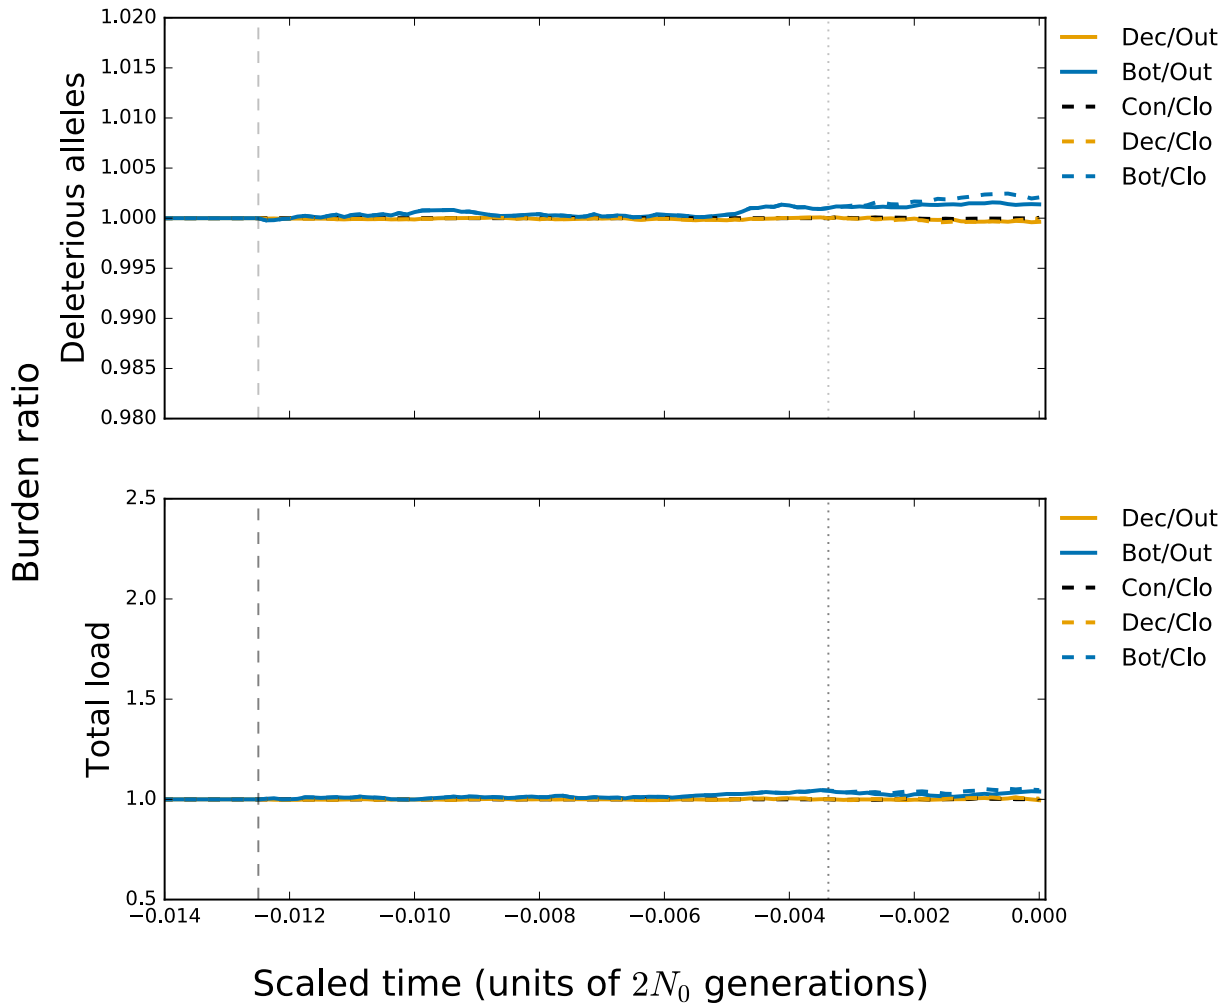

**Figure S12.** Forward simulations under a model of additive mutations (dominant coefficient  $h = 0.5$ ) for three demographic scenarios and two mating systems. The top graph represents the average number of deleterious alleles per accession relative to an outcrossing population of constant size. The bottom graph represents the total load relative to an outcrossing population of constant size. The dashed lines represent the time of demographic shift,  $\sim 30$ k years ago, and the onset of clonal propagation during domestication  $\sim 8$ k years ago. Data are displayed as the mean plus or minus the standard error over 500 replicate simulations. Abbreviations for demographic models are: Con = constant population size; Dec = declining population size; Bot = bottleneck. Abbreviations for mating schemes are: Out = outcrossing; Clo = clonal propagation.

**SUPPLEMENTARY TABLES:**

**Table S1** Summary statistics of sequenced samples

| Sample                                    | Accession No. | %unique mapped | Mapping depth | %ref covered | Data from           | Analyses <sup>1</sup> |
|-------------------------------------------|---------------|----------------|---------------|--------------|---------------------|-----------------------|
| <i>V. rotundifolia</i>                    | DVIT_2248     | 62.84          | 16.46         | 0.69         | Our effort          | Outgroup              |
| <i>V. vinifera</i> ssp. <i>sylvestris</i> |               |                |               |              |                     |                       |
| Azerbaijan1                               | DVIT_3599     | 90.21          | 14.7          | 0.88         | Our effort          | 1,2,3,4               |
| Azerbaijan2                               | DVIT_3608     | 89.38          | 13.38         | 0.86         | Our effort          | 1,2,4                 |
| Georgia                                   | DVIT_3350     | 91.42          | 10.89         | 0.89         | Our effort          | 1,2,3,4               |
| Armenia                                   | DVIT_3351     | 88.03          | 9.75          | 0.86         | Our effort          | 1,2,3,4               |
| Turkmenistan1                             | DVIT_2447     | 90.41          | 10.02         | 0.88         | Our effort          | 1,2                   |
| Turkmenistan2                             | DVIT_2445     | 91.3           | 10.83         | 0.9          | Our effort          | 1,2,4                 |
| Pakistan1                                 | DVIT_2261     | 91.64          | 13.06         | 0.92         | Our effort          | 1,2,4                 |
| Pakistan2                                 | DVIT_2266     | 91.56          | 15.14         | 0.93         | Our effort          | 1,2,3,4               |
| Pakistan3                                 | DVIT_2269     | 90.72          | 13.67         | 0.93         | Our effort          | 1,2,4                 |
| <i>V. vinifera</i> ssp. <i>vinifera</i>   |               |                |               |              |                     |                       |
| Aramon                                    | DVIT_633      | 91.54          | 14.02         | 0.93         | Our effort          | 1,2,3,4,5             |
| Chardonnay_04                             | DVIT_1332     | 91.29          | 48.94         | 0.98         | Our effort          | 1,2,3,4,5             |
| Gamay_Noir3                               | DVIT_8071     | 91.76          | 10.04         | 0.9          | Our effort          | 1,2,5                 |
| Pinot_Noir_123                            | DVIT_914      | 91.89          | 13.3          | 0.94         | Our effort          | 1,2,5                 |
| Primitivo_03                              | PI_325796     | 89.16          | 20.57         | 0.95         | Our effort          | 1,2,3,4               |
| Cabernet_Sauvignon08                      | DVIT_677      | 91.61          | 10.67         | 0.9          | Our effort          | 1,2,3,4               |
| Riesling_4                                | DVIT_8143     | 91.51          | 11.51         | 0.91         | Our effort          | 1,2,3,4               |
| Semillion_12                              | DVIT_1338     | 91.28          | 20.97         | 0.9          | Our effort          | 1,2,5                 |
| Traminer_1                                | DVIT_8186     | 91.45          | 18.97         | 0.87         | Our effort          | 1,2,5                 |
| Zinfandel_03                              | DVIT_1343     | 91.51          | 33.53         | 0.96         | Our effort          | 1,2                   |
| Muscat_of_Alexandria                      | DVIT_8114     | 91.64          | 11.82         | 0.91         | Our effort          | 1,2                   |
| Autumn_Royal                              |               | 88.59          | 12.92         | 0.81         | Cardone et al. 2016 | 1,2,3,4               |
| Italia                                    |               | 88.44          | 11.61         | 0.85         | Cardone et al. 2016 | 1,2,3,4               |
| Red_Globe                                 |               | 89.2           | 11.66         | 0.84         | Cardone et al. 2016 | 1,2,3,4               |
| Sultanina                                 |               | 91.14          | 62.34         | 0.97         | Genova et al. 2014  | 1,2,3,4,5             |
| Thompson_2A                               | DVIT_535      | 91.73          | 12.72         | 0.91         | Our effort          | 1,5                   |
| Thompson_RLK                              | DVIT_8178     | 91.33          | 10.82         | 0.89         | Our effort          | 1,5                   |
| Thompson_Seedless                         |               | 90.48          | 11.69         | 0.85         | Cardone et al. 2016 | 1,5                   |

Analyses: 1, population structure; 2, sweep mapping; 3, MSMC; 4, SMC++; 5,  $F_{ST}$  between table and wine grapes

**Table S2** Lists of genes identified as potentially selected, based on CLR,  $F_{ST}$ , Dxy and XP-CLR analyses.

| <b>CLR_ <i>vinifera</i></b> |                                                   |                            |
|-----------------------------|---------------------------------------------------|----------------------------|
| <b>Gene stable ID</b>       | <b>Functional annotation</b>                      | <b>Arabidopsis homolog</b> |
| VIT_01s0011g06260           | Anthranilate synthase beta subunit                | AT1G25220                  |
| VIT_01s0011g06270           | Hydroxyproline-rich glycoprotein                  | AT1G14710                  |
| VIT_01s0011g06280           | Oxidoreductase                                    | AT1G68080                  |
| VIT_01s0011g06290           | Purple acid phosphatase 3 ATPAP3/PAP3             | AT1G14700                  |
| VIT_01s0011g06300           | Annexin 5 (ANN5)                                  | AT1G68090                  |
| VIT_01s0011g06310           | Inositol polyphosphate related phosphatase        | AT2G01900                  |
| VIT_02s0012g00820           | Unknown                                           | -                          |
| VIT_02s0012g00830           | Expansin-like B1                                  | AT4G17030                  |
| VIT_02s0012g00840           | Pentatricopeptide (PPR) repeat-containing protein | AT1G08070                  |
| VIT_02s0012g00850           | Splicing factor PWI domain-containing protein     | AT1G31870                  |
| VIT_02s0012g00860           | No hit                                            | -                          |
| VIT_02s0012g00870           | RNA-binding protein 10                            | AT3G54230                  |
| VIT_02s0012g01950           | Photosystem II protein D1                         | -                          |
| VIT_02s0012g01960           | Transcription factor jumonji (jmj)                | AT5G46910                  |
| VIT_02s0012g02190           | Cellulose synthase CSLD2                          | AT5G16910                  |
| VIT_02s0012g02200           | No hit                                            | -                          |
| VIT_02s0012g02210           | No hit                                            | -                          |
| VIT_02s0012g02220           | Xyloglucan endotransglucosylase/hydrolase 30      | AT1G32170                  |
| VIT_02s0109g00280           | No hit                                            | -                          |
| VIT_02s0109g00290           | CYP76C6                                           | -                          |
| VIT_02s0109g00300           | CYP76B1                                           | AT3G61040                  |
| VIT_02s0241g00120           | Receptor protein kinase                           | AT4G22730                  |
| VIT_02s0241g00130           | No hit                                            | -                          |
| VIT_02s0241g00140           | Calmodulin (A)                                    | AT1G12310                  |
| VIT_02s0241g00150           | No hit                                            | -                          |
| VIT_02s0241g00160           | Esterase/lipase/thioesterase family               | AT4G12230                  |
| VIT_02s0241g00170           | Zinc finger (C2H2 type) family                    | AT4G12240                  |
| VIT_03s0017g00760           | E3 ubiquitin-protein ligase HUWE1                 | -                          |
| VIT_03s0017g00770           | Diacylglycerol kinase 2                           | -                          |
| VIT_03s0097g00380           | Monofunctional aspartokinase                      | AT5G13280                  |
| VIT_03s0097g00390           | Unknown protein                                   | AT1G33780                  |
| VIT_03s0110g00180           | No hit                                            | -                          |
| VIT_03s0110g00190           | Cytochrome oxidase subunit 1                      | ATMG01360                  |
| VIT_03s0110g00200           | Apocytochrome b                                   | ATMG00220                  |

|                   |                                             |           |
|-------------------|---------------------------------------------|-----------|
| VIT_04s0008g03610 | Xylan synthase                              | AT1G27600 |
| VIT_04s0008g03620 | Catalytic                                   | AT5G11560 |
| VIT_04s0008g03630 | Binding                                     | AT5G11550 |
| VIT_04s0008g03640 | FAD-binding domain-containing protein       | AT5G11540 |
| VIT_04s0008g03650 | Embryonic flower 1                          | -         |
| VIT_04s0008g03660 | Embryonic flower 1                          | AT5G11530 |
| VIT_04s0008g03670 | Tesmin/TSO1-like CXC domain-containing      | AT4G29000 |
| VIT_04s0008g06060 | Unknown                                     | -         |
| VIT_04s0008g06070 | Aberrant root formation protein 4 ALF4      | AT5G11030 |
| VIT_04s0008g06080 | Unknown protein                             | AT5G11040 |
| VIT_04s0008g06090 | Pentatricopeptide (PPR) repeat              | AT1G08070 |
| VIT_04s0008g06130 | KNAT2 (knotted1-like homeobox gene 3)       | AT5G25220 |
| VIT_04s0008g06140 | No hit                                      | -         |
| VIT_04s0008g06150 | No hit                                      | -         |
| VIT_04s0008g06160 | Neurochondrin family protein                | AT4G32050 |
| VIT_04s0008g06170 | Unknown protein                             | AT5G25265 |
| VIT_04s0008g06180 | Histone-lysine N-methyltransferase ATX1     | AT2G31650 |
| VIT_04s0008g06190 | Polyprotein                                 | -         |
| VIT_08s0032g00290 | RNA-binding region RNP-1                    | AT5G32450 |
| VIT_08s0032g00300 | Annexin A3                                  | AT5G12380 |
| VIT_08s0032g00310 | Ubiquitin-conjugating enzyme E2 A           | AT2G02760 |
| VIT_08s0032g00320 | Pigment defective 318 (PDE318)              | AT1G80770 |
| VIT_08s0032g00330 | Pigment defective 318 (PDE318)              | AT1G80770 |
| VIT_08s0032g00340 | No hit                                      | -         |
| VIT_08s0032g00350 | No hit                                      | -         |
| VIT_08s0032g00360 | N-6 Adenine-specific DNA methylase          | AT3G58470 |
| VIT_08s0032g00370 | No hit                                      | -         |
| VIT_08s0032g00380 | Myosin-like protein XIC                     | AT1G08730 |
| VIT_08s0032g00390 | Myosin-like protein                         | AT1G17580 |
| VIT_08s0032g00400 | Unknown                                     | -         |
| VIT_08s0032g00410 | Myosin-like protein XIX                     | AT5G20490 |
| VIT_08s0032g00420 | Exostosin                                   | AT4G38040 |
| VIT_08s0032g00440 | Syntaxin 1B/2/3/4                           | AT5G08080 |
| VIT_08s0032g00450 | No hit                                      | -         |
| VIT_08s0032g01110 | Axial regulator YABBY2                      | AT1G08465 |
| VIT_08s0032g01120 | Pentatricopeptide repeat-containing protein | -         |
| VIT_08s0032g01130 | Caffeic acid methyltransferase              | AT5G54160 |
| VIT_08s0032g01140 | Unknown protein                             | AT5G16280 |
| VIT_08s0105g00260 | Digalactosyldiacylglycerol synthase 1       | AT3G11670 |
| VIT_08s0105g00270 | NC domain-containing protein                | AT5G06370 |

|                   |                                                      |           |
|-------------------|------------------------------------------------------|-----------|
| VIT_08s0105g00280 | Ribosomal protein S8e                                | AT5G06360 |
| VIT_08s0105g00290 | Zinc finger (C3HC4-type ring finger)                 | AT5G01450 |
| VIT_08s0105g00300 | Phospholipase C                                      | AT3G08510 |
| VIT_08s0105g00310 | Rhodanese domain-containing protein                  | AT3G08920 |
| VIT_08s0105g00330 | Enhanced silencing phenotype 4 ESP4 symplekin        | AT5G01400 |
| VIT_08s0105g00340 | NLI interacting factor (NIF)                         | AT3G55960 |
| VIT_08s0105g00350 | DnaJ homolog, subfamily B, member 4                  | AT3G08910 |
| VIT_08s0105g00360 | PHD finger protein alfin                             | AT5G05610 |
| VIT_08s0105g00370 | Myb family                                           | AT2G01060 |
| VIT_08s0105g00380 | Leucoanthocyanidin dioxygenase                       | AT3G11180 |
| VIT_08s0105g00390 | Calcium-dependent protein kinase 13 CPK13            | AT3G51850 |
| VIT_08s0105g00400 | GT-1-like transcription factor                       | AT2G38250 |
| VIT_08s0105g00410 | Transposase, IS4                                     | AT5G41980 |
| VIT_08s0105g00420 | Unknown                                              | -         |
| VIT_08s0105g00430 | Omega-3 fatty acid desaturase, chloroplast precursor | AT5G05580 |
| VIT_08s0105g00440 | Selenoprotein                                        | AT5G58640 |
| VIT_08s0105g00450 | Transducin protein                                   | AT5G05570 |
| VIT_08s0105g00460 | Acyl-CoA oxidase (ACX4)                              | AT3G51840 |
| VIT_09s0002g00230 | Pentatricopeptide (PPR) repeat-containing protein    | AT3G18020 |
| VIT_09s0002g00260 | Unknown protein                                      | -         |
| VIT_09s0002g00280 | Ubiquitin-conjugating enzyme E2 J2                   | AT5G50430 |
| VIT_09s0002g00300 | APUM23 (Arabidopsis PUMILIO 23)                      | AT1G72320 |
| VIT_09s0002g00310 | ATP synthase CF0 A subunit                           | AT5G60390 |
| VIT_09s0002g00320 | Pectinesterase PME3                                  | AT3G14310 |
| VIT_09s0002g00330 | Pectinesterase PME1                                  | AT1G53840 |
| VIT_10s0003g04520 | No hit                                               | -         |
| VIT_10s0003g04530 | Cation: chloride symporter                           | AT1G30450 |
| VIT_10s0042g00010 | Strictosidine synthase                               | -         |
| VIT_10s0042g00020 | Strictosidine synthase                               | AT3G57030 |
| VIT_10s0042g00720 | ATP-dependent RNA helicase                           | -         |
| VIT_10s0042g00760 | No hit                                               | -         |
| VIT_10s0042g00770 | Leucine-rich repeat receptor-like protein kinase 1   | AT4G08850 |
| VIT_10s0042g00780 | Gag-pol polyprotein                                  | -         |
| VIT_10s0042g00790 | Unknown                                              | -         |
| VIT_10s0042g00800 | Proteasome 26S regulatory subunit (RPN2)             | AT2G32730 |
| VIT_10s0042g00950 | Succinyl-CoA ligase alpha 1 subunit                  | AT5G23250 |
| VIT_10s0042g00960 | DNAJ heat shock N-terminal domain-containing protein | AT5G23240 |
| VIT_10s0092g00470 | SHR5-receptor-like kinase                            | AT1G56130 |
| VIT_10s0092g00480 | CYP71D10p                                            | AT3G26330 |
| VIT_10s0092g00490 | CYP71A12                                             | -         |



|                   |                                                        |           |
|-------------------|--------------------------------------------------------|-----------|
| VIT_10s0092g00500 | CYP71D10                                               | AT5G25120 |
| VIT_10s0092g00510 | CYP71D10p                                              | AT3G26310 |
| VIT_10s0092g00520 | Leucine-rich repeat family                             | -         |
| VIT_10s0092g00560 | Transducin protein                                     | AT2G16405 |
| VIT_10s0092g00570 | Leucine-rich repeat family                             | AT1G56140 |
| VIT_10s0092g00580 | No hit                                                 | -         |
| VIT_10s0092g00590 | Leucine-rich repeat family                             | AT1G56140 |
| VIT_10s0092g00690 | Cysteine-rich receptor-like protein kinase 8           | AT4G23160 |
| VIT_10s0092g00780 | F-type H <sup>+</sup> -transporting ATPase alpha chain | ATMG01190 |
| VIT_10s0092g00790 | Ribosomal protein S19                                  | -         |
| VIT_11s0016g01710 | Myosin-like protein XIX                                | AT5G20490 |
| VIT_11s0016g01720 | Threonine synthase                                     | AT4G29840 |
| VIT_11s0016g01730 | VIP3 (vernalization independence 3)                    | AT4G29830 |
| VIT_11s0016g01740 | Zinc finger (C2H2 type) family                         | AT2G19385 |
| VIT_11s0016g01750 | Unknown protein                                        | AT4G26060 |
| VIT_11s0016g01760 | Cleavage and polyadenylation specificity factor 5      | AT4G29820 |
| VIT_11s0016g01770 | MKK2                                                   | AT4G29810 |
| VIT_11s0016g01780 | HAB1 (homology toABI1)                                 | AT1G72770 |
| VIT_11s0016g01790 | Unknown protein                                        | AT4G29790 |
| VIT_11s0016g01800 | Protein kinase MK6                                     | AT4G33080 |
| VIT_11s0016g01810 | Unknown protein                                        | AT5G12010 |
| VIT_11s0016g01820 | Lactoylglutathione lyase                               | AT5G57040 |
| VIT_11s0016g01830 | Protein kinase                                         | AT2G19410 |
| VIT_11s0016g01840 | No hit                                                 | -         |
| VIT_11s0016g01850 | Anthocyanidin-3-glucoside rhamnosyltransferase         | AT5G49690 |
| VIT_11s0016g01860 | RPS2 (resistant to p. syringae 2)                      | AT4G26090 |
| VIT_11s0016g01870 | Dihydrolipoamide S-acetyltransferase                   | AT1G54220 |
| VIT_11s0016g01890 | Telomere repeat binding factor 1                       | AT1G72740 |
| VIT_11s0016g01900 | N-MYRISTOYLtransferase                                 | AT5G57020 |
| VIT_11s0016g01910 | THO complex subunit 6                                  | AT2G19430 |
| VIT_11s0016g01920 | EIF-4A3                                                | AT1G54270 |
| VIT_11s0016g01930 | Diacylglycerol acyltransferase                         | AT2G19450 |
| VIT_11s0016g01940 | Unknown protein                                        | AT2G19460 |
| VIT_11s0016g01950 | Casein kinase I delta                                  | AT1G72710 |
| VIT_11s0016g02380 | 1-aminocyclopropane-1-carboxylate oxidase 2 (ACO1)     | AT2G19590 |
| VIT_11s0016g02400 | K <sup>+</sup> efflux antiporter (KEA4)                | AT2G19600 |
| VIT_11s0016g02410 | MYB divaricata                                         | AT5G56840 |
| VIT_11s0016g02420 | UDP-N-acetylglucosamine O-acyltransferase protein      | AT4G29540 |
| VIT_11s0016g02430 | Dual-specific kinase DSK1                              | AT3G13690 |
| VIT_11s0016g03130 | Ceramide glucosyltransferase                           | AT2G19880 |

|                   |                                                              |           |
|-------------------|--------------------------------------------------------------|-----------|
| VIT_11s0016g03140 | ERD7 (EARLY-responsive TO dehydration 7)                     | AT3G21600 |
| VIT_11s0016g03150 | TRNA a64-2'-o-ribosylphosphate transferase                   | AT2G40570 |
| VIT_11s0016g03160 | ABC transporter B member 11                                  | AT3G28345 |
| VIT_11s0016g03170 | Arabidopsis histidine phosphotransfer AHP4                   | AT3G16360 |
| VIT_11s0016g03180 | ABI1 (ABA insensitive 1)                                     | AT4G26080 |
| VIT_11s0037g01210 | Eceriferum 1 (CER1 protein) Sterol desaturase                | AT5G57800 |
| VIT_11s0052g00160 | ATP binding, related                                         | AT4G29920 |
| VIT_11s0052g00170 | Armadillo-like helical domain-containing                     | AT3G28430 |
| VIT_12s0055g01150 | Brassinosteroid insensitive 1-associated receptor kinase 1   | AT4G33430 |
| VIT_12s0055g01160 | Brassinosteroid insensitive 1-associated receptor kinase 1   | AT4G33430 |
| VIT_12s0057g00620 | Receptor Like Protein 6                                      | AT1G47890 |
| VIT_12s0057g00630 | LHCB2.1 (Photosystem II light harvesting complex gene 2.1)   | AT2G05100 |
| VIT_12s0057g00640 | Pentatricopeptide (PPR) repeat-containing                    | AT5G48910 |
| VIT_12s0057g00650 | fertility restorer homologue                                 | AT5G65560 |
| VIT_12s0057g00670 | Heat shock protein 90C                                       | AT3G07770 |
| VIT_12s0057g00680 | Constans interacting protein 6                               | AT5G48160 |
| VIT_12s0057g00690 | Histidine kinase (AHK2)                                      | AT5G35750 |
| VIT_12s0057g00700 | Glucan endo-1,3-beta-glucosidase 3 precursor                 | AT5G35740 |
| VIT_12s0057g00710 | DnaJ homolog, subfamily B, member 12                         | AT2G05230 |
| VIT_12s0057g00720 | F-box protein GID2                                           | AT5G48170 |
| VIT_12s0057g00730 | No hit                                                       | -         |
| VIT_12s0057g00740 | Pentatricopeptide (PPR) repeat-containing protein            | AT4G26680 |
| VIT_12s0057g00750 | CF9                                                          | AT1G45616 |
| VIT_12s0057g00760 | CF9                                                          | AT1G45616 |
| VIT_12s0057g00780 | Disease resistance protein                                   | AT3G28890 |
| VIT_12s0057g00800 | Receptor Like Protein 27                                     | AT1G47890 |
| VIT_12s0057g00810 | Serine-threonine protein kinase                              | -         |
| VIT_12s0057g00820 | Leucine-rich repeat                                          | AT1G45616 |
| VIT_12s0057g00860 | CF9                                                          | AT3G11010 |
| VIT_12s0057g00870 | CF9                                                          | AT3G11010 |
| VIT_12s0057g00880 | TAF15b (TBP-associated factor 15b) zf-ranBP                  | AT5G58470 |
| VIT_12s0057g00890 | Glycosyl hydrolase family 17 protein                         | AT5G58480 |
| VIT_12s0057g00900 | Import inner membrane translocase subunit TIM50              | AT1G55900 |
| VIT_12s0057g00910 | Sterile apetala                                              | AT5G35770 |
| VIT_12s0057g00920 | Transcriptional adapter ADA2a                                | AT3G07740 |
| VIT_12s0057g00930 | Hydroxycinnamoyl-CoA:shikimate hydroxycinnamoyltransferase   | AT5G41040 |
| VIT_12s0057g00940 | Glucose-6-phosphate 1-dehydrogenase 2, chloroplast precursor | AT5G35790 |
| VIT_12s0057g00950 | No hit                                                       | -         |
| VIT_12s0057g00960 | FAR1-related sequence 10                                     | AT5G28530 |
| VIT_12s0057g00970 | Pentatricopeptide (PPR) repeat-containing                    | AT5G09950 |

|                   |                                                                    |           |
|-------------------|--------------------------------------------------------------------|-----------|
| VIT_12s0057g00980 | Phytochrome defective C (PHYC)                                     | AT5G35840 |
| VIT_12s0057g00990 | Beta 1,2 N-acetylglucosaminyltransferase                           | AT2G05320 |
| VIT_12s0057g01000 | Unknown protein                                                    | AT4G13500 |
| VIT_12s0057g01010 | Nuclear transcription factor Ysubunit B-3                          | AT4G14540 |
| VIT_12s0057g01020 | fasciclin-like arabinogalactan protein FLA2                        | AT4G12730 |
| VIT_12s0057g01030 | Glucose-6-phosphate 1-dehydrogenase 2, chloroplast precursor       | AT5G35790 |
| VIT_12s0057g01040 | No hit                                                             | -         |
| VIT_12s0057g01050 | Unknown                                                            | -         |
| VIT_12s0057g01060 | Jasmonate O-methyltransferase                                      | AT3G11480 |
| VIT_12s0057g01070 | S-adenosyl-L-methionine: salicylic acid carboxyl methyltransferase | AT3G11480 |
| VIT_12s0057g01080 | Kelch repeat-containing protein                                    | AT3G07720 |
| VIT_12s0057g01090 | Nudix hydrolase 2                                                  | AT5G47650 |
| VIT_12s0057g01100 | Nudix hydrolase 2                                                  | AT5G47650 |
| VIT_12s0057g01110 | Nudix hydrolase 2                                                  | AT5G47650 |
| VIT_12s0057g01120 | No hit                                                             | -         |
| VIT_12s0057g01130 | R protein disease resistance protein                               | AT3G07040 |
| VIT_12s0057g01140 | AarF domain containing kinase                                      | AT3G07700 |
| VIT_12s0057g01150 | AarF domain containing kinase                                      | AT3G07700 |
| VIT_12s0057g01160 | AarF domain containing kinase                                      | AT3G07700 |
| VIT_12s0057g01170 | Pentatricopeptide (PPR) repeat-containing protein                  | AT5G61990 |
| VIT_12s0057g01180 | Lipase class 3                                                     | AT5G50890 |
| VIT_12s0057g01190 | No hit                                                             | -         |
| VIT_14s0006g01150 | ATP-binding cassette, sub-family F, member 1                       | -         |
| VIT_14s0006g01170 | ATP-dependent RNA helicase A                                       | AT2G35920 |
| VIT_14s0006g01180 | ATP-dependent RNA helicase A                                       | AT2G35920 |
| VIT_14s0006g01190 | No hit                                                             | -         |
| VIT_14s0006g01200 | Adenine phosphoribosyltransferase                                  | -         |
| VIT_14s0030g00030 | Glutathione synthetase, chloroplast precursor                      | AT5G27380 |
| VIT_14s0030g00040 | Disease resistance protein (CC-NBS-LRR class)                      | -         |
| VIT_14s0030g00080 | No hit                                                             | -         |
| VIT_14s0030g00850 | No hit                                                             | -         |
| VIT_14s0030g00860 | No hit                                                             | -         |
| VIT_14s0030g00870 | CC-NBS-LRR class                                                   | -         |
| VIT_14s0030g00880 | No hit                                                             | -         |
| VIT_14s0030g00890 | No hit                                                             | -         |
| VIT_14s0030g00900 | MRP-like ABC transporter MRP6                                      | -         |
| VIT_14s0030g00910 | SOD Cu/Zn superoxide dismutase                                     | -         |
| VIT_14s0030g00920 | Alcohol dehydrogenase                                              | -         |
| VIT_14s0030g00930 | Laccase                                                            | -         |
| VIT_14s0030g00950 | SOD Cu/Zn superoxide dismutase                                     | -         |

|                   |                                                                      |           |
|-------------------|----------------------------------------------------------------------|-----------|
| VIT_14s0030g00960 | R protein MLA10                                                      | AT4G27190 |
| VIT_14s0030g00970 | Oxidoreductase, zinc-binding dehydrogenase family                    | -         |
| VIT_14s0030g00980 | DNA-directed RNA polymerase III subunit C25                          | AT1G06790 |
| VIT_14s0030g00990 | R protein disease resistance protein                                 | AT4G27190 |
| VIT_14s0030g01000 | No hit                                                               | -         |
| VIT_14s0030g01020 | No hit                                                               | -         |
| VIT_14s0030g01030 | Alcohol dehydrogenase                                                | -         |
| VIT_14s0030g01040 | No hit                                                               | -         |
| VIT_14s0030g01050 | R protein disease resistance protein                                 | AT4G27190 |
| VIT_14s0030g01060 | No hit                                                               | -         |
| VIT_14s0030g01070 | No hit                                                               | -         |
| VIT_14s0081g00150 | Ankyrin                                                              | AT3G04710 |
| VIT_14s0083g00930 | BIM2 (BES1-interacting Myc-like protein 2)                           | AT1G69010 |
| VIT_14s0083g00940 | Auxin-independent growth promoter                                    | AT5G15740 |
| VIT_14s0083g00950 | U3 small nucleolar RNA-associated protein IMP3                       | AT5G15750 |
| VIT_14s0083g00960 | Auxin transport protein (BIG)                                        | AT3G02260 |
| VIT_14s0083g00970 | Ribosomal protein L7A (RPL7aB) 60S                                   | AT3G62870 |
| VIT_14s0083g00980 | Pollen Ole e 1 allergen and extensin                                 | AT5G15780 |
| VIT_14s0083g00990 | IMP dehydrogenase                                                    | AT5G38880 |
| VIT_14s0083g01000 | Zinc finger (C3HC4-type ring finger)                                 | AT3G02290 |
| VIT_14s0083g01010 | Protein disulfide oxidoreductase DSBA oxidoreductase                 | AT5G38900 |
| VIT_14s0083g01020 | Regulator of chromosome condensation (RCC1)                          | AT3G02300 |
| VIT_14s0128g00380 | Yip1 domain, member 1                                                | AT5G27490 |
| VIT_14s0128g00390 | Mitochondrial FAD carrier                                            | AT3G05290 |
| VIT_14s0128g00400 | Ras homolog gene family, member T1                                   | AT5G27540 |
| VIT_15s0021g00880 | ferredoxin-related                                                   | AT1G02180 |
| VIT_15s0021g00890 | Ring-H2 zinc finger protein ATL4                                     | AT3G60220 |
| VIT_15s0021g00900 | No hit                                                               | -         |
| VIT_15s0021g00910 | Dolichyl pyrophosphate Glc1Man9GlcNAc2 alpha-1,3-glucosyltransferase | AT2G44660 |
| VIT_15s0021g00920 | ATP synthase delta' chain, mitochondrial                             | AT5G47030 |
| VIT_15s0021g00930 | EMB2745 (embryo defective 2745)                                      | AT5G39710 |
| VIT_15s0021g00990 | LOL3 (LSD ONE like 3)                                                | AT1G02170 |
| VIT_15s0021g01000 | Ribosomal protein L37a (RPL37aB) 60S                                 | AT3G10950 |
| VIT_15s0021g01010 | Phosphatidylinositol-4-phosphate 5-kinase                            | AT2G35170 |
| VIT_15s0021g01020 | Casein kinase II subunit beta-2                                      | AT2G44680 |
| VIT_15s0021g01040 | CYP72A1                                                              | AT5G24910 |
| VIT_15s0021g01050 | No hit                                                               | -         |
| VIT_15s0021g01060 | CYP72A1                                                              | AT5G24910 |
| VIT_15s0045g00930 | Unknown                                                              | -         |
| VIT_15s0045g00940 | No hit                                                               | -         |

|                   |                                                           |           |
|-------------------|-----------------------------------------------------------|-----------|
| VIT_15s0045g00950 | No hit                                                    | -         |
| VIT_15s0045g00980 | R protein PRF disease resistance protein                  | AT1G50180 |
| VIT_15s0045g01010 | R protein PRF disease resistance protein                  | AT1G50180 |
| VIT_15s0045g01020 | R protein PRF disease resistance protein                  | AT5G43470 |
| VIT_15s0045g01030 | MRP-like ABC transporter MRP6                             | -         |
| VIT_15s0045g01040 | KH domain-containing protein                              | AT2G38610 |
| VIT_18s0001g14690 | Protein kinase                                            | AT1G77280 |
| VIT_18s0001g14700 | Unknown                                                   | -         |
| VIT_18s0001g14710 | Ketol-acid reductoisomerase precursor                     | AT3G58610 |
| VIT_18s0001g14720 | Ankyrin repeat family protein                             | -         |
| VIT_18s0001g14730 | Glutaredoxin                                              | AT5G42150 |
| VIT_18s0001g14740 | Protein binding                                           | -         |
| VIT_18s0001g14750 | Zinc finger (FYVE type) VPS19                             | AT1G20110 |
| VIT_18s0001g14760 | Lipase 3 (EXL3) family II extracellular                   | AT1G75900 |
| VIT_18s0001g14770 | Lipase 3 (EXL3) family II extracellular                   | AT1G75900 |
| VIT_18s0001g15230 | Unknown                                                   | -         |
| VIT_18s0001g15240 | Blue (type 1) copper domain                               | AT2G02850 |
| VIT_18s0001g15250 | Unknown                                                   | -         |
| VIT_18s0001g15260 | Myb domain protein 52                                     | AT1G17950 |
| VIT_18s0001g15270 | SCL1 (scarecrow-like 1)                                   | AT1G21450 |
| VIT_18s0001g15280 | RNA exonuclease 1                                         | AT5G25800 |
| VIT_18s0001g15290 | Ribosome maturation protein SDO1                          | AT1G43860 |
| VIT_18s0001g15300 | No hit                                                    | -         |
| VIT_18s0001g15310 | Thioredoxin M-type                                        | AT3G15360 |
| VIT_18s0001g15320 | SEU3B protein                                             | AT1G43850 |
| VIT_18s0001g15330 | SWEET1                                                    | AT1G21460 |
| VIT_18s0001g15340 | Pentatricopeptide (PPR) repeat-containing protein         | -         |
| VIT_18s0001g15350 | Pentatricopeptide (PPR) repeat-containing protein         | AT3G21470 |
| VIT_18s0001g15360 | Thylakoid lumenal 29.8 kDa protein                        | AT1G77090 |
| VIT_18s0001g15370 | Exostosin family protein                                  | AT1G21480 |
| VIT_18s0001g15380 | No hit                                                    | -         |
| VIT_18s0001g15390 | Gaiacol peroxidase                                        | AT4G25980 |
| VIT_18s0001g15400 | KOW domain-containing transcription factor family protein | AT4G08350 |
| VIT_18s0001g15410 | Alcohol dehydrogenase 1                                   | AT1G77120 |
| VIT_18s0001g15420 | Auxin efflux carrier protein 6                            | AT1G77110 |

---

**CLR\_ *sylvestris***

| <b>Gene stable ID</b> | <b>Functional_annotation</b>                                              | <b>Arabidopsis homolog</b> |
|-----------------------|---------------------------------------------------------------------------|----------------------------|
| VIT_02s0012g02570     | Guanine nucleotide-binding protein alpha-1 subunit                        | AT1G31930                  |
| VIT_02s0012g02580     | No hit                                                                    | -                          |
| VIT_02s0012g02590     | Galacturonosyltransferase 1                                               | -                          |
| VIT_02s0012g02600     | Octicosapeptide/Phox/Bem1p (PB1) domain-containing protein                | -                          |
| VIT_02s0012g02610     | SAR1 (suppressor of auxin resistance1) (Nup160)                           | -                          |
| VIT_02s0012g02620     | PFT1 (phytochrome and flowering time 1) MED25                             | -                          |
| VIT_02s0012g02640     | Aspartic-type endopeptidase                                               | -                          |
| VIT_02s0012g02650     | Purple acid phosphatase 2 PAP2                                            | -                          |
| VIT_02s0012g02660     | Proteasome 26S regulatory subunit (RPN9)                                  | AT5G45620                  |
| VIT_02s0012g02670     | Unknown protein                                                           | AT1G31940                  |
| VIT_02s0012g02680     | No hit                                                                    | -                          |
| VIT_02s0012g02690     | No hit                                                                    | -                          |
| VIT_02s0025g02890     | Ribosomal protein L11                                                     | AT1G32990                  |
| VIT_02s0025g02900     | Zinc transporter MTPA2                                                    | AT3G58810                  |
| VIT_02s0025g02920     | Quercetin 3-O-methyltransferase 1                                         | AT5G54160                  |
| VIT_02s0025g02930     | Caffeic acid O-3-methyltransferase                                        | AT5G54160                  |
| VIT_02s0025g02940     | Caffeic acid O-3-methyltransferase                                        | AT5G54160                  |
| VIT_02s0025g02960     | Naringenin,2-oxoglutarate 3-dioxygenase                                   | AT4G10490                  |
| VIT_02s0033g00230     | Unknown protein                                                           | AT5G48790                  |
| VIT_02s0033g00240     | Glucosyltransferase twi1                                                  | AT2G36780                  |
| VIT_13s0073g00120     | Ribosomal protein S17 (RPS17A) 40S                                        | AT5G04800                  |
| VIT_13s0073g00130     | Pentatricopeptide (PPR) repeat membrane-associated salt-inducible protein | AT5G04810                  |
| VIT_13s0073g00140     | Ovate family protein 13 OFP13                                             | AT5G04820                  |
| VIT_13s0073g00150     | Heat shock protein-related                                                | AT3G52490                  |
| VIT_13s0073g00160     | Unknown protein                                                           | AT5G04830                  |
| VIT_13s0073g00170     | Exocyst subunit EXO70 A1                                                  | AT5G03540                  |
| VIT_13s0073g00320     | Poly(A) polymerase                                                        | AT4G32850                  |
| VIT_13s0073g00380     | BHLH038/ORG2 (OBP3-responsive gene 2)                                     | AT3G56970                  |
| VIT_13s0073g00390     | No hit                                                                    | -                          |
| VIT_13s0073g00400     | BHLH038/ORG2 (OBP3-responsive gene 2)                                     | AT3G56970                  |
| VIT_13s0073g00410     | Nucleolar essential protein                                               | -                          |
| VIT_13s0073g00430     | BZIP transcription factor                                                 | AT5G04840                  |
| VIT_13s0073g00440     | BSU1-like protein 3 BSL3                                                  | AT2G27210                  |
| VIT_13s0106g00360     | Non-symbiotic hemoglobin class 1                                          | AT2G16060                  |
| VIT_13s0106g00370     | Myb family                                                                | -                          |
| VIT_13s0106g00380     | Phosphoacetylglucosamine mutase                                           | AT5G18070                  |

|                   |                                                      |           |
|-------------------|------------------------------------------------------|-----------|
| VIT_13s0106g00390 | VAP27-1 (VAMP/synaptobrevin-associated protein 27-1) | -         |
| VIT_13s0106g00400 | Vesicle associated protein VAP                       | -         |
| VIT_13s0106g00410 | Heat shock protein 81-4 (HSP81-4)                    | -         |
| VIT_13s0106g00420 | Metalloendopeptidase                                 | -         |
| VIT_13s0106g00430 | Auxin response factor ARF6                           | AT1G30330 |
| VIT_16s0013g01030 | Ethylene-responsive transcription factor ERF105      | AT5G51190 |
| VIT_16s0013g01040 | No hit                                               | -         |
| VIT_16s0013g01050 | Ethylene-responsive transcription factor ERF105      | AT4G17490 |
| VIT_16s0013g01060 | Ethylene-responsive transcription factor ERF105      | AT4G17490 |
| VIT_16s0013g01070 | Ethylene-responsive transcription factor ERF105      | AT5G51190 |
| VIT_16s0013g01080 | Ethylene-responsive transcription factor ERF105      | AT5G51190 |
| VIT_16s0013g01090 | Ethylene-responsive transcription factor ERF105      | AT5G61600 |
| VIT_16s0013g01110 | Ethylene-responsive transcription factor 5           | AT5G47230 |
| VIT_16s0100g00760 | Stilbene synthase 2 [Vitis sp. cv. 'Norton']         | AT5G13930 |
| VIT_16s0100g00770 | Stilbene synthase                                    | AT5G13930 |
| VIT_16s0100g00780 | Stilbene synthase                                    | AT5G13930 |
| VIT_16s0100g00800 | Stilbene synthase 4                                  | AT5G13930 |
| VIT_16s0100g00810 | Stilbene synthase [Vitis vinifera]                   | AT5G13930 |
| VIT_16s0100g00830 | Stilbene synthase                                    | AT5G13930 |
| VIT_16s0100g00840 | Stilbene synthase 4                                  | AT5G13930 |
| VIT_16s0100g00850 | Stilbene synthase                                    | AT5G13930 |
| VIT_16s0100g00860 | Chalcone synthase                                    | -         |
| VIT_16s0100g00870 | No hit                                               | -         |
| VIT_16s0100g00880 | Stilbene synthase [Vitis pseudoreticulata]           | AT5G13930 |
| VIT_16s0100g00900 | Stilbene synthase [Vitis pseudoreticulata]           | AT5G13930 |
| VIT_16s0100g00910 | Stilbene synthase - grape                            | AT5G13930 |
| VIT_16s0100g00920 | Stilbene synthase - grape                            | AT5G13930 |
| VIT_16s0100g00930 | Stilbene synthase 2                                  | -         |
| VIT_16s0100g00940 | Stilbene synthase 3 [Vitis sp. cv. 'Norton']         | AT5G13930 |
| VIT_16s0100g00950 | Stilbene synthase 3                                  | AT5G13930 |
| VIT_16s0100g00960 | Stilbene synthase [Vitis pseudoreticulata]           | AT5G13930 |
| VIT_16s0100g00970 | No hit                                               | -         |
| VIT_16s0100g00990 | Stilbene synthase 2                                  | -         |
| VIT_16s0100g01000 | Stilbene synthase 4                                  | -         |
| VIT_16s0100g01010 | Stilbene synthase                                    | AT5G13930 |
| VIT_16s0100g01020 | Stilbene synthase [Vitis pseudoreticulata]           | AT5G13930 |
| VIT_16s0100g01030 | Stilbene synthase [Vitis quinquangularis]            | AT5G13930 |
| VIT_16s0100g01040 | Stilbene synthase - grape                            | AT5G13930 |
| VIT_16s0100g01060 | Stilbene synthase                                    | AT5G13930 |
| VIT_16s0100g01070 | Resveratrol synthase [Vitis vinifera]                | AT5G13930 |

|                   |                                                       |           |
|-------------------|-------------------------------------------------------|-----------|
| VIT_16s0100g01080 | No hit                                                | -         |
| VIT_17s0000g10050 | Phosphopantothenoylcysteine decarboxylase             | AT3G18030 |
| VIT_17s0000g10200 | Steroid sulfotransferase                              | AT2G03760 |
| VIT_17s0000g10210 | Unknown protein                                       | AT3G48470 |
| VIT_17s0000g10240 | Isocitrate dehydrogenase [NADP]                       | AT3G48480 |
| VIT_17s0000g10250 | Proteasome 26S regulatory subunit (RPN7)              | AT4G24820 |
| VIT_17s0000g10260 | AarF domain containing kinase                         | AT4G24810 |
| VIT_17s0000g10420 | DNA-binding protein GT-1-related                      | AT1G13450 |
| VIT_17s0000g10430 | Glyceraldehyde-3-phosphate dehydrogenase, cytosolic 3 | AT1G13440 |
| VIT_17s0119g00070 | Unknown protein                                       | AT3G17800 |
| VIT_17s0119g00080 | Organic cation transport protein OCT1                 | AT1G73220 |
| VIT_17s0119g00090 | Unknown protein                                       | AT1G73240 |

---



| <b><i>F<sub>ST</sub></i> wild &amp; Cultivated</b> |                                                               |                            |
|----------------------------------------------------|---------------------------------------------------------------|----------------------------|
| <b>Gene stable ID</b>                              | <b>Functional annotation</b>                                  | <b>Arabidopsis homolog</b> |
| VIT_02s0012g00010                                  | No hit                                                        | -                          |
| VIT_02s0012g00020                                  | Glycine-rich protein                                          | AT4G17620                  |
| VIT_02s0012g00030                                  | Unknown                                                       | -                          |
| VIT_02s0012g00040                                  | No hit                                                        | -                          |
| VIT_02s0012g00050                                  | Glycine-rich protein                                          | AT4G17620                  |
| VIT_02s0012g00060                                  | Unknown                                                       | -                          |
| VIT_02s0012g00070                                  | Unknown protein                                               | AT5G47090                  |
| VIT_02s0012g00080                                  | Casein kinase II subunit beta-4                               | AT4G17640                  |
| VIT_02s0012g00090                                  | Phosphatidylinositol-4-phosphate 5-kinase                     | AT2G35170                  |
| VIT_02s0012g00100                                  | Ribosomal protein L37a (RPL37aB) 60S                          | AT3G10950                  |
| VIT_02s0012g00110                                  | Chromatin remodeling 31                                       | AT1G05490                  |
| VIT_02s0012g00140                                  | Novel plant snare 11                                          | AT2G35190                  |
| VIT_02s0012g02570                                  | Guanine nucleotide-binding protein alpha-1 subunit            | AT1G31930                  |
| VIT_02s0012g02580                                  | No hit                                                        | -                          |
| VIT_02s0012g02590                                  | Galacturonosyltransferase 1                                   | -                          |
| VIT_02s0012g02600                                  | Octicosapeptide/Phox/Bem1p (PB1) domain-containing protein    | -                          |
| VIT_02s0012g02610                                  | SAR1 (suppressor of auxin resistance1) (Nup160)               | -                          |
| VIT_02s0012g02620                                  | PFT1 (phytochrome and flowering time 1) MED25                 | -                          |
| VIT_02s0012g02640                                  | Aspartic-type endopeptidase                                   | -                          |
| VIT_02s0012g02650                                  | Purple acid phosphatase 2 PAP2                                | -                          |
| VIT_02s0012g02660                                  | Proteasome 26S regulatory subunit (RPN9)                      | AT5G45620                  |
| VIT_02s0012g02670                                  | Unknown protein                                               | AT1G31940                  |
| VIT_02s0012g02680                                  | No hit                                                        | -                          |
| VIT_02s0012g02690                                  | No hit                                                        | -                          |
| VIT_02s0012g02700                                  | Unknown                                                       | -                          |
| VIT_02s0012g02710                                  | Unknown                                                       | -                          |
| VIT_02s0012g02720                                  | RPM1 (resistance to p. syringae pv maculicola 1)              | AT3G07040                  |
| VIT_02s0012g02760                                  | Methionyl-tRNA synthetase                                     | AT4G13780                  |
| VIT_02s0012g02770                                  | ABC transporter g family pleiotropic drug resistance 12 PDR12 | AT1G15520                  |
| VIT_02s0012g02780                                  | Cytochrome b5 domain-containing protein                       | AT4G14965                  |
| VIT_02s0012g02790                                  | Secretory carrier membrane protein (SCAMP4)                   | AT1G32050                  |
| VIT_02s0012g02800                                  | No hit                                                        | -                          |
| VIT_02s0012g02810                                  | CYP76C4                                                       | AT2G45550                  |
| VIT_02s0012g02820                                  | Geraniol 10-hydroxylase                                       | AT2G45550                  |
| VIT_02s0012g02830                                  | UDP-glucosyl transferase                                      | AT3G02100                  |
| VIT_02s0012g02840                                  | No hit                                                        | -                          |
| VIT_02s0154g00010                                  | Auxin-responsive SAUR11                                       | AT3G60690                  |

|                   |                                                                      |           |
|-------------------|----------------------------------------------------------------------|-----------|
| VIT_02s0154g00020 | Vascular related NAC-domain protein 4                                | AT1G12260 |
| VIT_02s0154g00030 | No hit                                                               | -         |
| VIT_02s0154g00040 | Thylakoid lumenal protein                                            | AT1G12250 |
| VIT_02s0154g00050 | Glycosyl hydrolase family 5                                          | AT1G13130 |
| VIT_02s0154g00060 | Thylakoid lumenal protein                                            | -         |
| VIT_02s0154g00070 | Abnormal floral organs                                               | AT2G45190 |
| VIT_02s0154g00080 | Multi-copper oxidase (SKU5)                                          | AT4G12420 |
| VIT_02s0154g00090 | Vacuolar invertase 2, GIN2                                           | AT1G12240 |
| VIT_02s0154g00100 | Transaldolase totaL2                                                 | AT1G12230 |
| VIT_02s0154g00110 | Trehalose-6-phosphate phosphatase (AtTPPA)                           | AT4G12430 |
| VIT_02s0154g00120 | Unknown                                                              | AT4G22600 |
| VIT_02s0154g00130 | Exostosin (Xyloglucan galactosyltransferase KATAMARI 1)              | AT4G22580 |
| VIT_02s0154g00140 | 3-oxoacyl-[acyl-carrier-protein] synthase 3 A, chloroplast precursor | AT1G62640 |
| VIT_02s0154g00150 | PLATZ transcription factor                                           | AT3G60670 |
| VIT_02s0154g00160 | flavin-containing monooxygenase family protein / FMO family protein  | AT1G62600 |
| VIT_02s0154g00170 | flavin-containing monooxygenase 3                                    | -         |
| VIT_02s0154g00180 | flavin-containing monooxygenase 3                                    | AT1G62600 |
| VIT_02s0154g00190 | flavin-containing monooxygenase 3                                    | AT1G62620 |
| VIT_02s0154g00200 | Unknown protein                                                      | AT1G12120 |
| VIT_02s0154g00210 | WRKY DNA-binding protein 21                                          | AT2G30590 |
| VIT_02s0154g00220 | Zinc finger (C2H2 type) family                                       | AT1G62520 |
| VIT_02s0154g00230 | Phosphatidic acid phosphatase / PAP2                                 | AT4G22550 |
| VIT_02s0154g00240 | Oxysterol binding protein                                            | AT4G22540 |
| VIT_02s0154g00250 | Oxysterol binding protein                                            | AT4G22540 |
| VIT_02s0154g00260 | Nitrate transporter                                                  | AT1G12110 |
| VIT_02s0154g00270 | No hit                                                               | -         |
| VIT_02s0154g00280 | Arachidonic acid-induced DEA1                                        | AT1G12090 |
| VIT_02s0154g00290 | Extensin                                                             | AT4G12510 |
| VIT_02s0154g00300 | Small nuclear ribonucleoprotein Sm D3                                | AT1G12090 |
| VIT_02s0154g00310 | Protease inhibitor/seed storage/lipid transfer protein (LTP)         | AT1G62500 |
| VIT_02s0154g00320 | Protease inhibitor/seed storage/lipid transfer protein (LTP)         | AT2G45180 |
| VIT_02s0154g00330 | Unknown protein                                                      | AT5G47570 |
| VIT_02s0154g00340 | No hit                                                               | -         |
| VIT_02s0154g00350 | L-lactate dehydrogenase A                                            | AT4G17260 |
| VIT_02s0154g00360 | No hit                                                               | -         |
| VIT_02s0154g00370 | YbaK/prolyl-tRNA synthetase associated region                        | AT4G16510 |
| VIT_02s0154g00380 | Unknown                                                              | -         |
| VIT_02s0154g00390 | Autophagy 8f (APG8f)                                                 | AT4G16520 |
| VIT_02s0154g00400 | Scarecrow transcription factor 6 (SCL6)                              | AT4G00150 |

|                   |                                                       |           |
|-------------------|-------------------------------------------------------|-----------|
| VIT_02s0154g00410 | Unknown protein                                       | AT5G47580 |
| VIT_02s0154g00420 | No hit                                                | -         |
| VIT_02s0154g00430 | Unknown                                               | -         |
| VIT_02s0154g00440 | Unknown protein                                       | AT5G47580 |
| VIT_02s0154g00450 | Zinc knuckle                                          | -         |
| VIT_02s0154g00460 | Unknown protein                                       | AT4G16530 |
| VIT_02s0154g00470 | No hit                                                | -         |
| VIT_02s0154g00480 | Heat shock protein MTSHP                              | AT4G25200 |
| VIT_02s0154g00490 | Heat shock 22 kDa protein mitochondrial               | AT4G25200 |
| VIT_02s0154g00500 | VAP27-1 (VAMP/synaptobrevin-associated protein 27-1)  | AT3G60600 |
| VIT_02s0154g00510 | SEC14 cytosolic factor                                | AT5G47510 |
| VIT_02s0154g00520 | Aspartyl protease                                     | AT4G16563 |
| VIT_02s0154g00530 | Histidine triad nucleotide binding protein 3          | AT4G16566 |
| VIT_02s0154g00540 | Protein arginine N-methyltransferase                  | AT4G16570 |
| VIT_02s0154g00550 | DnaJ homolog, subfamily C, member 11                  | AT2G35720 |
| VIT_02s0154g00560 | No hit                                                | -         |
| VIT_02s0154g00580 | Unknown                                               | -         |
| VIT_02s0154g00590 | Unknown                                               | -         |
| VIT_02s0154g00600 | Pectinesterase family                                 | AT5G47500 |
| VIT_02s0154g00610 | Pex19 protein                                         | AT5G17550 |
| VIT_02s0154g00620 | Unknown                                               | -         |
| VIT_02s0236g00010 | Unknown                                               | -         |
| VIT_02s0236g00020 | Unknown                                               | -         |
| VIT_02s0236g00030 | Unknown                                               | -         |
| VIT_02s0236g00040 | Peptidyl-prolyl cis-trans isomerase, cyclophilin type | AT4G17070 |
| VIT_02s0236g00050 | Unknown                                               | -         |
| VIT_02s0236g00060 | Unknown                                               | -         |
| VIT_02s0236g00070 | Unknown                                               | -         |
| VIT_02s0236g00080 | Ribosomal protein P0 acidic                           | -         |
| VIT_02s0236g00090 | Unknown                                               | -         |
| VIT_02s0236g00100 | Unknown                                               | -         |
| VIT_02s0236g00110 | No hit                                                | -         |
| VIT_02s0236g00120 | Unknown                                               | -         |
| VIT_02s0236g00130 | SNF1-related protein kinase SRK2F                     | AT4G33950 |
| VIT_02s0236g00140 | Calcineurin B 1                                       | -         |
| VIT_02s0236g00150 | Calcineurin B 1                                       | AT4G17615 |
| VIT_02s0236g00160 | Serine/threonine Phosphatase 7                        | -         |
| VIT_02s0236g00170 | No hit                                                | -         |
| VIT_02s0241g00070 | Zinc finger (DHHC type)                               | AT3G60800 |
| VIT_02s0241g00080 | Glycine-rich protein-like                             | AT4G22740 |

|                   |                                                   |           |
|-------------------|---------------------------------------------------|-----------|
| VIT_02s0241g00090 | Translation release factor                        | AT1G62850 |
| VIT_02s0241g00100 | Unknown protein                                   | AT2G45360 |
| VIT_02s0241g00110 | Aminomethyltransferase                            | AT4G12130 |
| VIT_02s0241g00120 | Receptor protein kinase                           | AT4G22730 |
| VIT_02s0241g00130 | No hit                                            | -         |
| VIT_02s0241g00140 | Calmodulin (A)                                    | AT1G12310 |
| VIT_02s0241g00150 | No hit                                            | -         |
| VIT_02s0241g00160 | Esterase/lipase/thioesterase family               | AT4G12230 |
| VIT_02s0241g00170 | Zinc finger (C2H2 type) family                    | AT4G12240 |
| VIT_02s0241g00180 | UDP-D- glucuronate 4-epimerase 5 GAE5             | AT4G12250 |
| VIT_02s0241g00190 | No hit                                            | -         |
| VIT_02s0488g00010 | H (+)-ATPase 4 AHA4                               | AT5G62670 |
| VIT_02s0488g00020 | Palmitoyl-protein thioesterase 1 precursor        | AT3G60340 |
| VIT_02s0488g00030 | No hit                                            | -         |
| VIT_02s0488g00040 | Pentatricopeptide repeat-containing protein       | -         |
| VIT_02s0488g00050 | Dual specificity phosphatase                      | -         |
| VIT_04s0008g00030 | Unknown                                           | -         |
| VIT_04s0008g00050 | Ribosomal protein L5-1 60S                        | -         |
| VIT_04s0008g00060 | Proteasome 26S regulatory subunit S5A (RPN10)     | -         |
| VIT_04s0008g00080 | No hit                                            | -         |
| VIT_04s0008g00130 | Avr9/Cf-9 rapidly elicited protein 146            | AT1G52140 |
| VIT_04s0008g00160 | Casein kinase                                     | AT2G25760 |
| VIT_04s0008g00170 | Retrotransposon protein, Unclassified             | AT1G15215 |
| VIT_04s0008g00180 | NADP-dependent malic enzyme                       | AT1G79750 |
| VIT_04s0008g00190 | ATP-dependent protease La (LON) domain-containing | AT2G25740 |
| VIT_04s0008g00200 | Tryptophan-tRNA ligase                            | AT2G25840 |
| VIT_04s0008g00210 | Histidine-containing phosphotransferase           | AT3G16360 |
| VIT_04s0008g00220 | IAA6                                              | AT3G16500 |
| VIT_04s0008g00230 | Amino acid permease 8                             | AT1G10010 |
| VIT_04s0008g00240 | Amino acid permease 6                             | AT5G49630 |
| VIT_04s0008g00250 | Amino acid permease 6                             | AT5G49630 |
| VIT_04s0008g00260 | Amino acid permease 6                             | AT5G49630 |
| VIT_04s0008g00270 | Elongation factor 1-alpha (EF-1-alpha)            | AT5G60390 |
| VIT_04s0008g00280 | Amino acid permease 1                             | AT1G58360 |
| VIT_04s0008g00290 | Clavata1 receptor kinase (CLV1)                   | AT5G25930 |
| VIT_04s0008g00300 | Clavata1 receptor kinase (CLV1)                   | AT5G25930 |
| VIT_04s0008g00310 | Clavata1 receptor kinase (CLV1)                   | AT5G25930 |
| VIT_04s0008g00320 | Leucine-rich repeat family protein                | -         |
| VIT_04s0008g00330 | Clavata1 receptor kinase (CLV1)                   | AT5G25930 |
| VIT_04s0008g00340 | Clavata1 receptor kinase (CLV1)                   | AT5G25930 |

|                   |                                                    |           |
|-------------------|----------------------------------------------------|-----------|
| VIT_04s0008g00350 | Clavata1 receptor kinase (CLV1)                    | AT5G25930 |
| VIT_04s0008g00370 | Clavata1 receptor kinase (CLV1)                    | AT5G25930 |
| VIT_04s0008g00380 | No hit                                             | -         |
| VIT_04s0008g00390 | Clavata1 receptor kinase (CLV1)                    | AT5G25930 |
| VIT_04s0008g00400 | Clavata1 receptor kinase (CLV1)                    | AT5G25930 |
| VIT_04s0008g00410 | Clavata1 receptor kinase (CLV1)                    | AT5G25930 |
| VIT_04s0008g00420 | Clavata1 receptor kinase (CLV1)                    | AT5G25930 |
| VIT_04s0008g00430 | Clavata1 receptor kinase (CLV1)                    | AT5G25930 |
| VIT_04s0008g00440 | Clavata1 receptor kinase (CLV1)                    | AT5G25930 |
| VIT_04s0008g00450 | Haloacid dehalogenase hydrolase                    | AT2G25870 |
| VIT_04s0008g00460 | Unknown protein                                    | AT5G56550 |
| VIT_04s0008g00470 | Early nodulin Enod93 protein                       | -         |
| VIT_04s0008g00480 | Pentatricopeptide (PPR) repeat-containing          | AT5G48910 |
| VIT_04s0008g00490 | Profilin 5 (PRO5) (PRF3)                           | AT5G56600 |
| VIT_04s0008g00510 | Derlin-1                                           | AT4G29330 |
| VIT_04s0008g00520 | 6-phosphofructokinase                              | AT4G26270 |
| VIT_04s0008g00530 | Serine/threonine-protein kinase Aurora-1           | AT4G32830 |
| VIT_04s0008g00540 | Oleosin OLE-3                                      | AT2G25890 |
| VIT_04s0008g00550 | Unknown protein                                    | AT1G20890 |
| VIT_04s0008g00560 | Tetratricopeptide repeat (TPR)-containing          | AT4G32820 |
| VIT_04s0008g00570 | Glu-tRNA(Gln) amidotransferase subunit C           | AT4G32915 |
| VIT_04s0008g00600 | RNA polymerase sigma factor SIGC                   | AT3G53920 |
| VIT_04s0008g00610 | Zinc finger (CCCH-type) family protein             | AT2G19810 |
| VIT_04s0008g00620 | Myb domain protein 68                              | AT5G65790 |
| VIT_04s0008g00630 | SNF7.2                                             | -         |
| VIT_04s0008g00640 | Epsin N-terminal homology (ENTH) domain-containing | AT5G11710 |
| VIT_04s0008g00650 | 3'-5' exonuclease domain-containing protein        | AT2G25910 |
| VIT_04s0008g00660 | Early flowering 3                                  | AT2G25930 |
| VIT_04s0008g00670 | DD1A protein                                       | AT5G25950 |
| VIT_04s0008g00680 | Unknown protein                                    | AT4G32930 |
| VIT_04s0008g00690 | Unknown protein                                    | AT5G11730 |
| VIT_04s0008g00700 | No hit                                             | -         |
| VIT_04s0008g00710 | Unknown                                            | -         |
| VIT_04s0008g00720 | Vacuolar processing enzyme gamma                   | AT4G32940 |
| VIT_04s0008g00730 | Unknown protein                                    | AT3G20430 |
| VIT_04s0008g00740 | Protein phosphatase 2C                             | AT5G26010 |
| VIT_04s0008g00750 | Unknown protein                                    | AT4G32960 |
| VIT_04s0008g00760 | Thioredoxin Trp26                                  | AT2G25950 |
| VIT_04s0008g00770 | Glycine hydroxymethyltransferase                   | AT4G32520 |
| VIT_04s0008g00780 | Unknown                                            | -         |

|                   |                                                                           |           |
|-------------------|---------------------------------------------------------------------------|-----------|
| VIT_04s0008g00790 | Ribosomal protein L28 (RPL28C) 60S                                        | AT2G19730 |
| VIT_04s0008g00800 | Ferrochelatase-2                                                          | AT5G26030 |
| VIT_04s0008g00810 | ATP synthase g subunit mitochondrial                                      | AT4G29480 |
| VIT_04s0008g00820 | KH domain-containing protein                                              | AT2G25970 |
| VIT_04s0008g00830 | NADH dehydrogenase (ubiquinone) Fe-S protein 7                            | AT5G11770 |
| VIT_04s0008g00840 | Ser/Thr specific protein phosphatase 2A B regulatory subunit beta isoform | AT1G17720 |
| VIT_04s0008g00850 | Unknown                                                                   | -         |
| VIT_04s0008g00860 | Ndr family protein                                                        | AT5G11790 |
| VIT_04s0008g00870 | Phosphoethanolamine/phosphocholine phosphatase                            | AT1G17710 |
| VIT_04s0008g00880 | Homeobox gene 1                                                           | AT4G32980 |
| VIT_04s0008g00890 | Abscisic acid receptor PYL2 RCAR14                                        | AT2G26040 |
| VIT_04s0008g00900 | MYB divaricata                                                            | AT5G56840 |
| VIT_04s0008g00910 | Histone deacetylase protein (HDA2)                                        | AT5G26040 |
| VIT_04s0008g00920 | Clavata1 receptor kinase (CLV1)                                           | AT5G25930 |
| VIT_04s0008g00930 | Alpha-expansin 6 precursor                                                | -         |
| VIT_04s0008g00950 | Calcineurin B protein 10                                                  | AT4G33000 |
| VIT_04s0008g00960 | Calcineurin B protein 10                                                  | AT4G33000 |
| VIT_04s0008g00970 | Translation initiation factor eIF-4A                                      | -         |
| VIT_04s0008g00980 | Translation initiation factor eIF-4A                                      | -         |
| VIT_04s0008g00990 | Translation initiation factor eIF-4A                                      | AT3G13920 |
| VIT_04s0008g01000 | EIF-4A3                                                                   | AT3G13920 |
| VIT_04s0008g01010 | No hit                                                                    | -         |
| VIT_04s0008g01020 | Unknown protein                                                           | AT5G11970 |
| VIT_04s0008g01030 | Unknown protein                                                           | AT5G11960 |
| VIT_04s0008g01040 | Lysine decarboxylase                                                      | AT5G11950 |
| VIT_04s0008g01050 | Unknown                                                                   | -         |
| VIT_04s0008g01060 | Substrate carrier, Mitochondrial                                          | AT1G14560 |
| VIT_04s0008g01070 | Calmodulin-binding region IQD6                                            | AT2G26190 |
| VIT_04s0008g01080 | Calmodulin-binding region IQD6                                            | AT2G26180 |
| VIT_04s0008g01090 | CYP706A12                                                                 | AT2G26170 |
| VIT_04s0008g01100 | CYP706A12                                                                 | AT2G26170 |
| VIT_04s0008g01110 | Heat shock transcription factor A6B                                       | AT2G26150 |
| VIT_04s0008g01120 | Glutaredoxin                                                              | AT4G33040 |
| VIT_04s0008g01130 | Solute carrier family 25                                                  | AT5G56450 |
| VIT_04s0008g01140 | Beta-fructosidase (BFRUCT1)                                               | AT3G13790 |
| VIT_04s0008g01150 | Beta-fructosidase (BFRUCT1)                                               | AT3G13790 |
| VIT_04s0008g01160 | Indeterminate(ID)-domain 7                                                | AT3G13810 |
| VIT_04s0008g01170 | FtsH protease that is localized to the mitochondrion                      | AT2G26140 |
| VIT_04s0008g01180 | Esterase                                                                  | AT5G11910 |
| VIT_04s0008g01190 | UDP-sulfoquinovose synthase SQD1                                          | AT4G33030 |

|                   |                                                |           |
|-------------------|------------------------------------------------|-----------|
| VIT_04s0008g01200 | Eukaryotic translation initiation factor SUI1  | AT5G11900 |
| VIT_04s0008g01210 | Delta-8 sphingolipid desaturase                | AT2G46210 |
| VIT_04s0008g01220 | RKL1 (Receptor-like kinase 1)                  | AT1G68400 |
| VIT_04s0008g01230 | Harpin-induced protein                         | AT1G17620 |
| VIT_04s0008g01240 | SAG18 (Senescence associated gene 18)          | AT5G11870 |
| VIT_04s0008g01250 | Unknown                                        | -         |
| VIT_04s0008g01260 | Zinc transporter ZIP4                          | AT1G10970 |
| VIT_04s0008g01270 | Beta-1,3-galactosyltransferase 6               | AT2G26100 |
| VIT_04s0008g01280 | No hit                                         | -         |
| VIT_04s0008g01290 | CGA1 (cytokinin-responsive GATA factor 1)      | AT4G26150 |
| VIT_04s0008g01300 | Glycine dehydrogenase                          | AT4G33010 |
| VIT_04s0008g01310 | MAP3K delta-1 protein kinase                   | AT5G11850 |
| VIT_04s0008g01320 | Unknown protein                                | AT5G11840 |
| VIT_04s0008g01330 | RTE1 (reversion-to-ethylene sensitivity1)      | AT2G26070 |
| VIT_04s0008g01340 | Unknown protein                                | AT5G11810 |
| VIT_04s0008g01350 | Conserved oligomeric Golgi complex component 8 | AT5G11980 |
| VIT_04s0008g01360 | Tassel serine threonine kinase 1               | AT5G12000 |
| VIT_04s0008g01370 | Peptidyl-prolyl cis-trans isomerase SDCCAG10   | AT4G33060 |
| VIT_04s0008g01380 | Unknown protein                                | AT5G12010 |
| VIT_04s0008g01390 | RNA recognition motif (RRM)-containing protein | AT1G21312 |
| VIT_04s0008g01400 | Protein kinase MK6                             | AT4G33080 |
| VIT_04s0008g01410 | Ran-binding protein 1 RanBP1                   | AT5G58590 |
| VIT_04s0008g01420 | HAB2 (Homology to ABI2)                        | AT1G17550 |
| VIT_04s0008g01430 | APM1 (Aminopeptidase M1)                       | AT4G33090 |
| VIT_04s0008g01440 | UPF0203 protein                                | AT4G33100 |
| VIT_04s0008g01450 | Cyclopropane-fatty-acyl-phospholipid synthase  | AT4G33110 |
| VIT_04s0008g01460 | Unknown protein                                | AT5G26160 |
| VIT_04s0008g01470 | WRKY DNA-binding protein 50                    | AT5G26170 |
| VIT_04s0008g01480 | NOL1/NOP2/sun family protein                   | AT5G26180 |
| VIT_04s0008g01490 | Heat shock protein 17.6 kDa class II           | AT5G12020 |
| VIT_04s0008g01500 | Heat shock protein 17.6 kDa class II           | AT5G12020 |
| VIT_04s0008g01510 | Heat shock protein 17.6 kDa class II           | AT5G12020 |
| VIT_04s0008g01520 | Heat shock protein 17.6 kDa class II           | AT5G12020 |
| VIT_04s0008g01530 | Small molecular heat shock protein 17.5        | AT5G12020 |
| VIT_04s0008g01540 | No hit                                         | -         |
| VIT_04s0008g01550 | Small molecular heat shock protein 17.5        | AT5G12020 |
| VIT_04s0008g01560 | Small molecular heat shock protein 17.5        | AT5G12020 |
| VIT_04s0008g01570 | Heat shock protein 17.6 kDa class II           | AT5G12020 |
| VIT_04s0008g01580 | Heat shock protein 17.6 kDa class II           | AT5G12020 |
| VIT_04s0008g01590 | Heat shock protein 17.6 kDa class II           | AT5G12020 |

|                   |                                      |           |
|-------------------|--------------------------------------|-----------|
| VIT_04s0008g01610 | Heat shock protein 17.6 kDa class II | -         |
| VIT_04s0008g01620 | Heat shock protein 17.6 kDa class II | -         |
| VIT_04s0008g01630 | No hit                               | -         |
| VIT_04s0008g01640 | Ankyrin repeat                       | -         |
| VIT_04s0008g01650 | Ankyrin repeat                       | AT5G51160 |
| VIT_04s0008g01660 | Carrier protein, Mitochondrial       | AT1G72820 |
| VIT_04s0008g01670 | PHD finger protein alfin             | AT5G26210 |
| VIT_04s0008g01680 | EMB2745                              | AT5G39710 |
| VIT_04s0008g01690 | Carbon-nitrogen hydrolase            | AT5G12040 |
| VIT_04s0008g01700 | Unknown protein                      | AT1G54200 |
| VIT_04s0008g01710 | MAP3K delta-1 protein kinase         | AT4G38470 |
| VIT_04s0008g01720 | Mechanosensitive ion channel         | AT5G12080 |
| VIT_04s0008g01730 | PSBX (photosystem II subunit X)      | -         |
| VIT_04s0008g01740 | Spermine synthase ACAULIS5           | AT5G19530 |
| VIT_04s0008g01750 | Ribosomal protein S3 (RPS3C) 40S     | AT5G35530 |
| VIT_04s0008g01760 | PEX10 (peroxin 10)                   | AT2G26350 |
| VIT_04s0008g01770 | Molecular chaperone DnaJ             | AT5G21430 |
| VIT_04s0008g01780 | Transposon protein, putative, CACTA  | -         |
| VIT_04s0008g01790 | No hit                               | -         |
| VIT_04s0008g01800 | Myb domain protein 7                 | AT4G38620 |
| VIT_04s0008g01810 | Myb domain protein 4                 | AT4G38620 |
| VIT_04s0008g01820 | TT2 (transparent testa 2)            | AT5G35550 |
| VIT_04s0008g01830 | Myb domain protein 32                | AT4G34990 |
| VIT_04s0008g01840 | TT2 (transparent testa 2)            | AT5G35550 |
| VIT_04s0008g01850 | Trihelix DNA-binding protein (GT2)   | AT1G76880 |
| VIT_04s0008g01860 | CYP72A58                             | AT3G14690 |
| VIT_04s0008g01870 | ATMYB66/WER/WER1 (WEREWOLF 1)        | AT5G14750 |
| VIT_04s0008g01880 | Cytokinin dehydrogenase 7            | AT5G21482 |
| VIT_04s0008g01890 | F-box family protein (FBL15)         | AT4G33210 |
| VIT_04s0008g01900 | Unknown protein                      | AT2G26340 |
| VIT_04s0008g01910 | ferredoxin-related                   | AT1G02180 |
| VIT_04s0008g01920 | F-box/LRR-repeat protein 20          | AT2G06040 |
| VIT_04s0008g01940 | Unknown                              | -         |
| VIT_04s0008g01950 | YGGT                                 | AT5G21920 |
| VIT_04s0008g01960 | Copper-transporting ATPase PAA2      | AT5G21930 |
| VIT_04s0008g01970 | ER (ERECTA)                          | AT2G26330 |
| VIT_04s0008g01980 | MADS-box agamous-like 30             | -         |
| VIT_04s0008g01990 | Myosin-like protein XI-I             | AT4G33200 |
| VIT_04s0008g02000 | Unknown protein                      | AT5G21940 |
| VIT_04s0008g02010 | Endo-1,4-beta-glucanase              | AT3G43860 |



|                   |                                                     |           |
|-------------------|-----------------------------------------------------|-----------|
| VIT_04s0008g02020 | Cellulase                                           | AT3G43860 |
| VIT_04s0008g02030 | Unknown protein                                     | AT2G26310 |
| VIT_04s0008g02040 | Heterotrimeric G protein alpha subunit              | AT2G26300 |
| VIT_04s0008g02050 | Hydrolase, alpha/beta fold                          | AT4G33180 |
| VIT_04s0008g02070 | Avr9/Cf-9 induced kinase 1                          | AT2G05940 |
| VIT_04s0008g02080 | GCR1 (G-protein-coupled receptor 1)                 | AT1G48270 |
| VIT_04s0008g02090 | Copper transporter 5                                | AT1G72510 |
| VIT_04s0008g02100 | CID7 damaged DNA binding                            | AT2G26280 |
| VIT_04s0008g02110 | No hit                                              | -         |
| VIT_04s0008g02120 | EMB2758 (embryo defective 2758)                     | AT4G33170 |
| VIT_04s0008g02140 | EMB2261 (embryo defective 2261)                     | AT4G33170 |
| VIT_04s0008g02150 | DCL3 (DICER-like 3)                                 | AT3G43920 |
| VIT_04s0008g02170 | DCL3 (DICER-like 3)                                 | AT3G43920 |
| VIT_04s0008g02180 | BRCT domain-containing protein                      | AT3G43930 |
| VIT_04s0008g02190 | Glutathione synthase S6 modification                | -         |
| VIT_04s0008g02200 | 3-beta-hydroxy-delta5-steroid dehydrogenase         | AT2G26260 |
| VIT_04s0008g02210 | RPD1 (root primordium defective 1)                  | AT5G21970 |
| VIT_04s0008g02220 | Sterile alpha motif (SAM) domain-containing protein | AT2G45700 |
| VIT_04s0008g02230 | AP2 domain-containing transcription factor ORA47    | AT1G19210 |
| VIT_04s0008g02240 | Ubiquitin thiolesterase                             | -         |
| VIT_04s0008g02250 | Beta-ketoacyl-CoA synthase                          | AT2G26250 |
| VIT_04s0008g02260 | Dimethylaniline monooxygenase (N-oxide forming) 2   | AT1G19250 |
| VIT_04s0008g02270 | Hydroxyproline-rich glycoprotein                    | AT5G21280 |
| VIT_04s0008g02280 | Unknown protein                                     | AT3G43540 |
| VIT_04s0008g02290 | ABI3-interacting protein 2                          | AT5G20910 |
| VIT_04s0008g02300 | Pyruvate dehydrogenase E1 beta subunit              | AT5G50850 |
| VIT_04s0008g02310 | ABI3-interacting protein 2, AIP2                    | AT5G20910 |
| VIT_04s0008g02320 | Coatomer subunit beta                               | AT4G31480 |
| VIT_04s0008g02330 | Protein tyrosine phosphatase                        | AT5G10700 |
| VIT_04s0008g02340 | Exocyst subunit EXO70 protein                       | AT4G31540 |
| VIT_04s0008g02350 | No hit                                              | -         |
| VIT_04s0008g02360 | No hit                                              | -         |
| VIT_04s0008g02370 | Pentatricopeptide (PPR) repeat-containing protein   | AT5G10690 |
| VIT_04s0008g02380 | Kelch repeat-containing F-box protein               | AT2G24540 |
| VIT_04s0008g02390 | Zinc finger (C3HC4-type ring finger)                | AT5G24870 |
| VIT_04s0008g02400 | No hit                                              | -         |
| VIT_04s0008g02410 | Unknown protein                                     | AT4G31440 |
| VIT_04s0008g02420 | No hit                                              | -         |
| VIT_04s0008g02440 | Unknown protein                                     | AT5G10710 |
| VIT_04s0008g02450 | Unknown protein                                     | AT5G25500 |

|                   |                                                      |           |
|-------------------|------------------------------------------------------|-----------|
| VIT_04s0008g02460 | H <sup>+</sup> -transporting ATPase, Plasma membrane | AT2G24520 |
| VIT_04s0008g02470 | No hit                                               | -         |
| VIT_04s0008g02480 | Unknown protein                                      | AT4G31430 |
| VIT_04s0008g02490 | Adagio protein 1                                     | AT5G57360 |
| VIT_04s0008g02500 | Hydroxyproline-rich glycoprotein LKP2                | AT2G18910 |
| VIT_04s0008g02510 | Receptor kinase homolog LRK10                        | AT1G70250 |
| VIT_04s0008g02520 | ATP binding protein                                  | AT1G34300 |
| VIT_04s0008g02530 | ATP binding protein                                  | AT1G34300 |
| VIT_04s0008g02540 | Zinc finger (C2H2 type) family                       | AT4G31420 |
| VIT_04s0008g02550 | 4-coumarate-CoA ligase                               | AT4G31410 |
| VIT_04s0008g02560 | AarF domain containing kinase                        | AT4G31390 |
| VIT_04s0008g02570 | Replicon protein A (ATRPA2/ROR1/RPA2)                | AT2G24490 |
| VIT_04s0008g02580 | V-type H <sup>+</sup> -transporting ATPase subunit A | AT1G78900 |
| VIT_04s0008g02590 | Selenoprotein                                        | AT4G31360 |
| VIT_04s0008g02600 | fasciclin arabinogalactan-protein (FLA14)            | AT3G12660 |
| VIT_04s0008g02610 | FPF1 (flowering promoting factor 1)                  | AT5G10625 |
| VIT_04s0008g02620 | Small nuclear ribonucleoprotein                      | AT4G18372 |
| VIT_04s0008g02630 | Unknown protein                                      | AT2G19160 |
| VIT_04s0008g02640 | PAP/fibrillin family                                 | AT5G19940 |
| VIT_04s0008g02650 | Unknown protein                                      | AT5G10620 |
| VIT_04s0008g02660 | Calmodulin-binding protein                           | AT2G43040 |
| VIT_04s0008g02670 | Cryptochrome DASH                                    | AT5G24850 |
| VIT_04s0008g02680 | No hit                                               | -         |
| VIT_04s0008g02690 | ELM2 domain-containing protein                       | AT2G19260 |
| VIT_04s0008g02700 | TRNA (guanine-N (1)-)-methyltransferase              | AT5G24840 |
| VIT_04s0008g02710 | NAC domain containing protein 39                     | AT2G24430 |
| VIT_04s0008g02720 | Myosin heavy chain                                   | AT4G31340 |
| VIT_04s0008g02730 | No hit                                               | -         |
| VIT_04s0008g02740 | AarF domain containing kinase                        | AT5G24810 |
| VIT_04s0008g02750 | BZIP transcription factor BZO2H2                     | AT5G24800 |
| VIT_04s0008g02760 | Unknown protein                                      | AT4G31330 |
| VIT_04s0008g02770 | Syntaxin-related protein KNOLLE                      | AT1G08560 |
| VIT_04s0008g02780 | RBR1 (retinoblastoma-related 1)                      | AT3G12280 |
| VIT_04s0008g02790 | Short-chain dehydrogenase/reductase (SDR)            | AT5G15940 |
| VIT_04s0008g02800 | SAUR_D                                               | AT2G24400 |
| VIT_04s0008g02810 | Chaperone protein dnaJ                               | AT2G24395 |
| VIT_04s0008g02820 | Glycosyltransferase family protein 47                | -         |
| VIT_04s0008g02830 | Galactokinase like protein                           | AT4G16130 |
| VIT_04s0008g02840 | Avirulence induced gene (AIG)                        | AT2G24390 |
| VIT_04s0008g02850 | Proteasome 20S beta subunit A (PBA1) (PRCD)          | AT4G31300 |

|                   |                                                          |           |
|-------------------|----------------------------------------------------------|-----------|
| VIT_04s0008g02860 | Cation transport protein chaC                            | AT4G31290 |
| VIT_04s0008g02870 | Transcription factor                                     | AT4G31270 |
| VIT_04s0008g02880 | Extracellular ligand-gated ion channel                   | AT2G21080 |
| VIT_04s0008g02890 | Receptor kinase                                          | AT4G31250 |
| VIT_04s0008g02900 | Protein disulfide isomerase                              | AT4G31240 |
| VIT_04s0008g02910 | Tassel serine threonine kinase 1                         | AT2G24370 |
| VIT_04s0008g02920 | Desiccation protein PCC13-62 precursor                   | AT1G47980 |
| VIT_04s0008g02930 | Oligouridylate binding protein 1B UBP1B                  | AT1G17370 |
| VIT_04s0008g02950 | DNA topoisomerase I                                      | AT4G31210 |
| VIT_04s0008g02960 | CYP706A12                                                | AT5G36110 |
| VIT_04s0008g02970 | Calmodulin-binding protein                               | AT2G43040 |
| VIT_04s0008g02980 | Lupeol synthase                                          | AT1G78955 |
| VIT_04s0008g02990 | Cycloartenol synthase                                    | -         |
| VIT_04s0008g03000 | Cycloartenol synthase                                    | AT1G78950 |
| VIT_04s0008g03010 | Aspartyl-tRNA synthetase                                 | AT4G31180 |
| VIT_04s0008g03020 | Serine/threonine/tyrosine kinase DSK2                    | AT2G24360 |
| VIT_04s0008g03030 | RNA recognition motif (RRM)-containing                   | AT2G24350 |
| VIT_04s0008g03040 | RNA recognition motif (RRM)-containing                   | AT2G24350 |
| VIT_04s0008g03050 | Acetylglutamate kinase                                   | AT3G57560 |
| VIT_04s0008g03060 | Transducin protein                                       | AT4G31160 |
| VIT_04s0008g03070 | No hit                                                   | -         |
| VIT_04s0008g03080 | Endonuclease V family protein                            | AT4G31150 |
| VIT_04s0008g03090 | Unknown protein                                          | AT4G31130 |
| VIT_04s0008g03100 | Unknown protein                                          | AT4G31130 |
| VIT_04s0008g03110 | EMB1611                                                  | AT2G34780 |
| VIT_04s0008g03120 | Protein arginine N-methyltransferase 5                   | AT4G31120 |
| VIT_04s0008g03130 | Unknown protein                                          | -         |
| VIT_04s0008g03140 | Unknown                                                  | -         |
| VIT_04s0008g03150 | S-adenosyl-L-methionine-dependent methyltransferase mraW | AT5G10910 |
| VIT_04s0008g03160 | G protein protein gamma subunit (AGG2)                   | -         |
| VIT_04s0008g03170 | Ubiquitin-specific protease 26 (UBP26)                   | AT3G49600 |
| VIT_04s0008g03180 | Unknown protein                                          | AT4G20325 |
| VIT_04s0008g03190 | F-box family protein (FBX13)                             | AT4G33160 |
| VIT_04s0008g03200 | Lachrymatory factor synthase                             | AT4G32870 |
| VIT_04s0008g03210 | Lachrymatory factor synthase                             | AT4G32870 |
| VIT_04s0008g03220 | Lysophospholipase                                        | AT5G11650 |
| VIT_04s0008g03230 | Unknown protein                                          | AT5G25840 |
| VIT_04s0008g03240 | BAM2 (big apical meristem 2)                             | AT2G25790 |
| VIT_04s0008g03250 | Homeobox gene 8                                          | AT4G32880 |
| VIT_04s0008g03260 | Thioredoxin domain containing 14                         | AT5G11640 |

|                   |                                                                                  |           |
|-------------------|----------------------------------------------------------------------------------|-----------|
| VIT_04s0008g03270 | GATA transcription factor 11                                                     | AT5G25830 |
| VIT_04s0008g03280 | No hit                                                                           | -         |
| VIT_04s0008g03290 | Peptidyl-tRNA hydrolase 2                                                        | AT4G32900 |
| VIT_04s0008g03300 | SWIM zinc finger family (MAPKKK)                                                 | AT5G11620 |
| VIT_04s0008g03310 | Pentatricopeptide (PPR) repeat                                                   | AT1G11290 |
| VIT_04s0008g03320 | UVB-resistance protein                                                           | AT5G11580 |
| VIT_04s0008g03330 | Nucleoporin nup85                                                                | AT4G32910 |
| VIT_04s0008g03340 | No hit                                                                           | -         |
| VIT_04s0008g03350 | Unknown protein                                                                  | AT2G25800 |
| VIT_04s0008g03360 | F-box and leucine-rich repeat protein 20                                         | -         |
| VIT_04s0008g03370 | YebC                                                                             | AT2G25830 |
| VIT_04s0008g03380 | Carotenoid cleavage dioxygenase 8                                                | AT4G32810 |
| VIT_04s0008g03390 | No hit                                                                           | -         |
| VIT_04s0008g03400 | DREB sub A-4 of ERF/AP2 transcription factor                                     | AT5G11590 |
| VIT_04s0008g03410 | Unknown protein                                                                  | AT5G11600 |
| VIT_04s0008g03420 | Exostosin family protein                                                         | AT5G25820 |
| VIT_04s0008g03430 | Exostosin family                                                                 | AT5G25820 |
| VIT_04s0008g03440 | Exosome complex exonuclease RRP46                                                | AT3G46210 |
| VIT_04s0008g03450 | Lignostilbene-alpha, beta-dioxygenase and related enzymes                        | AT3G63520 |
| VIT_04s0008g03460 | Histidine kinase 1 AHK3                                                          | AT1G27320 |
| VIT_04s0008g03470 | Myb domain protein 109                                                           | -         |
| VIT_04s0008g03480 | Beta-carotene 15,15'-monooxygenase                                               | AT3G63520 |
| VIT_04s0008g03490 | Ankyrin repeat protein                                                           | -         |
| VIT_04s0008g03500 | Ankyrin                                                                          | AT1G10340 |
| VIT_04s0008g03510 | Lignostilbene-alpha, beta-dioxygenase and related enzymes                        | AT3G63520 |
| VIT_04s0008g03520 | Ring-H2 finger protein ATL4J                                                     | -         |
| VIT_04s0008g03530 | Ankyrin repeat                                                                   | AT1G10340 |
| VIT_04s0043g00680 | No hit                                                                           | -         |
| VIT_04s0043g00690 | ARR22 Type A                                                                     | AT3G04280 |
| VIT_04s0043g00700 | PTAC3 (plastid transcriptionally active3)                                        | AT3G04260 |
| VIT_04s0043g00710 | Hypoxia up-regulated 1 HSP70                                                     | AT4G16660 |
| VIT_04s0043g00720 | Transketolase                                                                    | AT2G34590 |
| VIT_04s0043g00730 | formamidopyrimidine-DNA glycosylase 1                                            | AT1G52500 |
| VIT_04s0043g00740 | Cytoplasmic FMR1 interacting protein                                             | AT5G18410 |
| VIT_04s0043g00750 | No hit                                                                           | -         |
| VIT_04s0043g00760 | UDP-N-acetylglucosamine--peptide N-acetylglucosaminyltransferase SEC             | AT3G04240 |
| VIT_04s0043g00770 | Pentatricopeptide (PPR) repeat-containing protein                                | AT5G18390 |
| VIT_04s0043g00780 | Unknown                                                                          | -         |
| VIT_04s0043g00790 | ribulose-1,5 biphosphate carboxylase oxygenase large subunit N-methyltransferase | AT1G01920 |

|                   |                                                                         |           |
|-------------------|-------------------------------------------------------------------------|-----------|
| VIT_04s0043g00800 | 2OG-Fe(II) oxygenase                                                    | AT2G36690 |
| VIT_04s0043g00810 | No hit                                                                  | -         |
| VIT_04s0043g00820 | Syntaxin 1B/2/3/4                                                       | AT2G18260 |
| VIT_04s0043g00830 | Unknown protein                                                         | AT3G04160 |
| VIT_04s0043g00840 | Armadillo/beta-catenin repeat protein / U-box domain-containing protein | AT3G07360 |
| VIT_04s0043g00850 | Unknown protein                                                         | AT5G18310 |
| VIT_04s0043g00860 | Unknown protein                                                         | AT2G38430 |
| VIT_04s0043g00870 | Unknown protein                                                         | AT1G08530 |
| VIT_04s0043g00880 | Tyrosine decarboxylase                                                  | -         |
| VIT_13s0019g01410 | OBP3 (OBF-binding protein 3)                                            | AT5G02460 |
| VIT_13s0019g01430 | Heat shock protein 70                                                   | AT5G02500 |
| VIT_13s0019g01440 | No hit                                                                  | -         |
| VIT_13s0019g01450 | Unknown protein                                                         | AT3G04020 |
| VIT_13s0019g01470 | Geranylgeranyltransferase type I beta subunit                           | AT2G39550 |
| VIT_13s0019g01490 | C2 domain-containing protein                                            | AT3G55470 |
| VIT_13s0019g01510 | Unknown protein                                                         | AT2G39690 |
| VIT_13s0019g01530 | Adaptor-related protein complex 3, beta 2 subunit                       | AT3G55480 |
| VIT_13s0019g01570 | Unknown protein                                                         | AT5G54440 |
| VIT_13s0019g01590 | Pentatricopeptide repeat-containing protein                             | -         |
| VIT_13s0019g01600 | No hit                                                                  | -         |
| VIT_13s0019g01610 | XH/XS domain-containing protein                                         | AT3G48670 |
| VIT_13s0019g01620 | No hit                                                                  | -         |
| VIT_13s0019g01640 | Unknown protein                                                         | AT1G13790 |
| VIT_13s0019g01650 | Alpha-expansin 6 precursor                                              | AT2G39700 |
| VIT_13s0019g01670 | Telomeric DNA binding protein 1                                         | AT5G13820 |
| VIT_13s0019g01700 | Scarecrow transcription factor 14 (SCL14)                               | AT1G07530 |
| VIT_13s0019g01710 | Scarecrow transcription factor 14 (SCL14)                               | AT1G07530 |
| VIT_13s0019g01740 | Scarecrow transcription factor 14 (SCL14)                               | AT1G07530 |
| VIT_13s0019g01780 | Scarecrow transcription factor 14 (SCL14)                               | AT1G07530 |
| VIT_13s0019g01790 | Scarecrow transcription factor 14 (SCL14)                               | AT1G07530 |
| VIT_13s0019g01810 | Scarecrow transcription factor 14 (SCL14)                               | AT1G07530 |
| VIT_13s0019g01820 | Cell division protein methyltransferase FtsJ                            | AT5G13830 |
| VIT_13s0019g01840 | Cell division cycle 20-like protein 1                                   | AT5G13840 |
| VIT_13s0019g01860 | Actin-related protein 5                                                 | AT3G12380 |
| VIT_13s0019g01870 | No hit                                                                  | -         |
| VIT_13s0019g01890 | DVL11/RTFL8 (ROTUNDIFOLIA like 8)                                       | AT2G39705 |
| VIT_13s0019g01900 | FK506-binding protein 4/5                                               | AT3G55520 |
| VIT_13s0019g01920 | Laccase                                                                 | AT5G60020 |
| VIT_13s0019g01930 | Laccase                                                                 | AT5G60020 |
| VIT_13s0019g01940 | Laccase                                                                 | AT5G60020 |

|                   |                                                                  |           |
|-------------------|------------------------------------------------------------------|-----------|
| VIT_13s0019g01960 | Zinc finger (C3HC4-type ring finger)                             | AT3G55530 |
| VIT_13s0019g01970 | No hit                                                           | -         |
| VIT_13s0019g01980 | Aspartic proteinase nepenthesin-2 precursor                      | AT2G39710 |
| VIT_13s0019g01990 | Phospholipid/glycerol acyltransferase                            | AT5G06090 |
| VIT_13s0019g02000 | PUMILIO 1 (APUM1)                                                | AT2G29200 |
| VIT_13s0019g02010 | SRG1 (senescence-related gene 1)                                 | AT3G21420 |
| VIT_13s0019g02020 | Thaumatococcus                                                   | AT5G02140 |
| VIT_13s0019g02030 | HAT dimerisation domain-containing protein                       | -         |
| VIT_13s0019g02040 | Lectin protein kinase                                            | AT3G55550 |
| VIT_13s0019g02050 | Ribulose biphosphate carboxylase/oxygenase activase, chloroplast | AT2G39730 |
| VIT_13s0019g02060 | Lateral organ boundaries domain protein 33 (LBD33)               | AT5G06080 |
| VIT_13s0019g02070 | Phosphoribosylformylglycinamide synthase, chloroplast precursor  | -         |
| VIT_13s0019g02080 | DNA-binding protein                                              | AT3G55560 |
| VIT_13s0019g02090 | Thylakoid lumenal 15 kDa protein 1                               | AT2G44920 |
| VIT_13s0019g02100 | No hit                                                           | -         |
| VIT_13s0019g02110 | fringe-related protein                                           | AT2G37730 |
| VIT_13s0019g02120 | Zinc finger (C2H2 type) family                                   | AT2G37740 |
| VIT_13s0019g02130 | Tropinone reductase                                              | AT5G06060 |
| VIT_13s0019g02140 | Tropinone reductase                                              | AT5G06060 |
| VIT_13s0019g02150 | Laccase                                                          | AT5G60020 |
| VIT_13s0019g02160 | Laccase                                                          | AT5G60020 |
| VIT_13s0019g02170 | Laccase                                                          | AT5G06060 |
| VIT_13s0019g02180 | Tropinone reductase                                              | AT5G06060 |
| VIT_13s0019g02190 | No hit                                                           | -         |
| VIT_13s0019g02200 | Protein phosphatase 2CA AHG3 PP2CA                               | AT3G11410 |
| VIT_13s0019g02210 | Sterol 4-alpha-methyl-oxidase 1 (SMO1)                           | AT1G07420 |
| VIT_13s0019g02220 | No hit                                                           | -         |
| VIT_13s0019g02230 | PAP/25A associated domain containing protein                     | AT2G39740 |
| VIT_13s0019g02240 | Ribosomal protein S7 (RPS7B) 40S                                 | AT3G02560 |
| VIT_13s0019g02250 | Ankyrin                                                          | AT2G39750 |
| VIT_13s0019g02260 | BTB-POZ and math Domain 3 ATBPM3                                 | AT2G39760 |
| VIT_13s0019g02270 | Unknown protein                                                  | AT3G55570 |
| VIT_13s0019g02280 | Regulator of chromosome condensation (RCC1)                      | AT3G55580 |
| VIT_13s0019g02290 | Wall-associated receptor kinase-like 20                          | AT5G02070 |
| VIT_13s0019g02300 | Wall-associated receptor kinase-like 20                          | AT5G02070 |
| VIT_13s0019g02310 | Translation initiation factor eIF-3 subunit 4                    | AT3G11400 |
| VIT_13s0019g02320 | No hit                                                           | -         |
| VIT_13s0019g02340 | Unknown protein                                                  | AT3G53850 |
| VIT_13s0019g02350 | Glycoprotein, Mitochondrial                                      | AT3G55605 |

|                   |                                                              |           |
|-------------------|--------------------------------------------------------------|-----------|
| VIT_13s0019g02360 | Pyrroline-5-carboxylate synthetase                           | AT3G55610 |
| VIT_13s0019g02370 | Yip1 domain, member 2                                        | AT2G39805 |
| VIT_13s0019g02380 | Exostosin                                                    | -         |
| VIT_13s0019g02390 | Dihydrofolate synthetase                                     | AT5G05980 |
| VIT_13s0019g02400 | Transducin protein                                           | AT5G05970 |
| VIT_13s0019g02410 | Serine/threonine protein phosphatase PP1                     | AT2G39840 |
| VIT_13s0019g02430 | LIM domain containing protein                                | AT2G39830 |
| VIT_13s0019g02440 | Mitochondrial substrate carrier family protein               | AT3G53940 |
| VIT_13s0019g02450 | BEL1-like homeodomain protein 9 LSN (LARSON)                 | AT5G02030 |
| VIT_13s0019g02460 | Proton-dependent oligopeptide transport (POT) family protein | AT2G37900 |
| VIT_13s0019g02470 | RAB GTPase RABA2B                                            | AT1G07410 |
| VIT_13s0019g02480 | Subtilisin serine endopeptidase (XSP1)                       | AT4G00230 |
| VIT_13s0019g02490 | Subtilisin protease C1                                       | AT5G59190 |
| VIT_13s0019g02500 | No hit                                                       | -         |
| VIT_13s0019g02510 | CCR4-NOT transcription complex, subunit 4                    | -         |
| VIT_13s0019g02520 | Subtilisin protease C1                                       | AT5G58830 |
| VIT_13s0019g02530 | Subtilisin protease C1                                       | AT5G59190 |
| VIT_13s0019g02540 | Subtilisin protease C1                                       | AT5G59190 |
| VIT_13s0019g02550 | Subtilisin protease C1                                       | AT5G59100 |
| VIT_13s0019g02560 | Subtilisin protease C1                                       | AT5G59100 |
| VIT_13s0019g02580 | Subtilisin protease C1                                       | AT5G59100 |
| VIT_13s0019g02590 | Subtilisin protease C1                                       | AT5G59190 |
| VIT_13s0019g02600 | Subtilisin protease C1                                       | AT5G59120 |
| VIT_13s0019g02610 | Subtilisin protease C1                                       | AT5G59190 |
| VIT_13s0019g02620 | Subtilisin protease C1                                       | AT5G59190 |
| VIT_13s0019g02630 | Photosystem II PsbA                                          | ATCG00020 |
| VIT_13s0019g02640 | Subtilisin protease C1                                       | AT5G59190 |
| VIT_13s0019g02650 | U4/U6 small nuclear ribonucleoprotein SNU13                  | AT5G20160 |
| VIT_13s0019g02660 | Unknown protein                                              | -         |
| VIT_13s0019g02680 | Unknown                                                      | -         |
| VIT_13s0019g02690 | Protease inhibitor/seed storage/lipid transfer protein (LTP) | AT3G53980 |
| VIT_13s0019g02700 | MEE60 (maternal effect embryo arrest 60)                     | AT5G05950 |
| VIT_13s0019g02710 | Rho guanyl-nucleotide exchange factor ROPGEF5                | AT5G05940 |
| VIT_13s0019g02720 | Guanylyl cyclase (GC1)                                       | AT5G05930 |
| VIT_13s0019g02730 | Unknown protein                                              | AT3G54000 |
| VIT_13s0019g02740 | Heat shock protein 17.6 kDa class I                          | AT5G59720 |
| VIT_13s0019g02750 | No hit                                                       | -         |
| VIT_13s0019g02760 | Heat shock protein 17.6 kDa class I                          | AT5G59720 |
| VIT_13s0019g02770 | Heat shock protein 17.6 kDa class I                          | AT5G59720 |
| VIT_13s0019g02780 | Heat shock protein 17.6 kDa class I                          | AT5G59720 |

|                   |                                               |           |
|-------------------|-----------------------------------------------|-----------|
| VIT_13s0019g02810 | Glucuronosyl transferase                      | AT3G11340 |
| VIT_13s0019g02820 | Heat shock protein 18.2 kDa class I           | AT5G59720 |
| VIT_13s0019g02830 | No hit                                        | -         |
| VIT_13s0019g02840 | Heat shock protein 18.2 kDa class I           | AT5G59720 |
| VIT_13s0019g02850 | Heat shock protein 17.6 kDa class I           | AT5G59720 |
| VIT_13s0019g02860 | UDP-glucuronosyl and UDP-glucosyl transferase | AT3G55700 |
| VIT_13s0019g02870 | No hit                                        | -         |
| VIT_13s0019g02880 | UDP-glucuronosyl/UDP-glucosyl transferase     | AT3G11340 |
| VIT_13s0019g02890 | Glucosyltransferase-2                         | AT1G22360 |
| VIT_13s0019g02900 | Chaperone                                     | AT1G53540 |
| VIT_13s0019g02910 | Cis-zeatin O-beta-D-glucosyltransferase       | AT1G22400 |
| VIT_13s0019g02920 | Small heat-shock protein Cytosolic class I    | -         |
| VIT_13s0019g02930 | Heat shock protein 17.6 kDa class I           | -         |
| VIT_13s0019g02940 | Cis-zeatin O-beta-D-glucosyltransferase       | AT1G22400 |
| VIT_13s0019g02950 | UGT76C2 (UDP-glucosyl transferase 76C2)       | AT3G11340 |
| VIT_13s0019g02960 | UGT76C2 (UDP-glucosyl transferase 76C2)       | AT3G11340 |
| VIT_13s0019g02980 | No hit                                        | -         |
| VIT_13s0019g02990 | Cis-zeatin O-beta-D-glucosyltransferase       | AT1G22360 |
| VIT_13s0019g03000 | Heat shock protein 17.6 kDa class I           | -         |
| VIT_13s0019g03010 | Heat shock protein 17.6 kDa class I           | -         |
| VIT_13s0019g03020 | Glucosyltransferase-2                         | AT1G22360 |
| VIT_13s0019g03030 | Chaperone                                     | AT5G59720 |
| VIT_13s0019g03040 | Indole-3-acetate beta-glucosyltransferase     | AT1G22360 |
| VIT_13s0019g03050 | Heat shock protein 17.6 kDa class I           | -         |
| VIT_13s0019g03060 | Glucosyltransferase-2                         | AT1G22360 |
| VIT_13s0019g03070 | Heat shock protein 17.6 kDa class I           | -         |
| VIT_13s0019g03080 | No hit                                        | -         |
| VIT_13s0019g03090 | Heat shock protein class I (HSP17.8-CI)       | -         |
| VIT_13s0019g03100 | Cis-zeatin O-beta-D-glucosyltransferase       | AT1G22400 |
| VIT_13s0019g03110 | Heat shock protein 17.6 kDa class I           | -         |
| VIT_13s0019g03120 | Glucosyltransferase-2                         | AT1G22400 |
| VIT_13s0019g03130 | Glucosyltransferase-2                         | AT1G22400 |
| VIT_13s0019g03140 | Heat shock protein 17.6 kDa class I           | -         |
| VIT_13s0019g03150 | Membrane protein                              | -         |
| VIT_13s0019g03160 | Heat shock protein 17.6 kDa class I           | -         |
| VIT_13s0019g03170 | Heat shock protein 16.9 kDa class I           | AT3G46230 |
| VIT_13s0019g03180 | Unknown protein                               | AT5G05840 |
| VIT_13s0019g03190 | Zinc finger (C3HC4-type ring finger)          | AT5G05830 |
| VIT_13s0019g03200 | Myb domain protein 109                        | AT3G55730 |
| VIT_13s0019g03210 | Lectin-like protein                           | AT5G01090 |



|                   |                                                        |           |
|-------------------|--------------------------------------------------------|-----------|
| VIT_13s0019g03220 | Proline transporter 1 (ProT1)                          | AT2G39890 |
| VIT_13s0019g03230 | Unknown protein                                        | -         |
| VIT_13s0019g03240 | Syntaxin 18                                            | AT1G51740 |
| VIT_13s0019g03250 | Auxin-independent growth promoter                      | AT2G37980 |
| VIT_13s0019g03260 | Ribosomal protein L35a (RPL35aC) 60S                   | AT1G07070 |
| VIT_13s0019g03270 | Phosphate translocator protein2, Plastidic             | AT3G11320 |
| VIT_13s0019g03280 | LIM domain containing protein                          | AT3G55770 |
| VIT_13s0019g03290 | Unknown protein                                        | AT2G39910 |
| VIT_13s0019g03300 | Glycosyl hydrolase family 17                           | -         |
| VIT_13s0019g03310 | Transposon protein                                     | AT5G05800 |
| VIT_13s0019g03320 | Acid phosphatase class B                               | AT2G39920 |
| VIT_13s0019g03330 | Adenylosuccinate lyase                                 | AT1G36280 |
| VIT_13s0019g03340 | No hit                                                 | -         |
| VIT_13s0019g03350 | Sedoheptulose-1,7-bisphosphatase (SBPase), Chloroplast | -         |
| VIT_13s0019g03360 | Laccase                                                | -         |
| VIT_13s0019g03370 | Myb family                                             | -         |
| VIT_13s0019g03380 | Coronatine-insensitive protein 1                       | AT2G39940 |
| VIT_13s0019g03390 | Unknown protein                                        | AT2G39950 |
| VIT_13s0019g03400 | Signal peptidase complex subunit 2                     | AT2G39960 |
| VIT_13s0019g03410 | Peroxisomal membrane protein (PMP36)                   | AT2G39970 |
| VIT_13s0019g03420 | C2 domain-containing protein                           | AT1G07310 |
| VIT_13s0019g03430 | Anthocyanin 5-aromatic acyltransferase                 | AT2G39980 |
| VIT_13s0019g03450 | Unknown protein                                        | AT3G55820 |
| VIT_13s0019g03460 | Homeodomain transcription factor 5                     | AT3G11260 |
| VIT_13s0019g03470 | Translation initiation factor eIF-3 subunit 5          | AT2G39990 |
| VIT_13s0019g03480 | HAD superfamily hydrolase                              | AT3G45740 |
| VIT_13s0019g03490 | Zinc finger (CCCH-type) family protein                 | AT2G20280 |
| VIT_13s0019g03510 | Zinc finger (CCCH-type) family protein                 | AT2G20280 |
| VIT_13s0019g03520 | No hit                                                 | -         |
| VIT_13s0019g03530 | No hit                                                 | -         |
| VIT_13s0019g03540 | Regulator of nonsense transcripts 2 UPF2               | AT2G39260 |
| VIT_13s0019g03550 | APETALA2 (AP2) floral homeotic protein                 | AT4G36920 |
| VIT_13s0019g03560 | Unknown protein                                        | AT5G13610 |
| VIT_13s0019g03570 | Unknown protein                                        | AT3G11760 |
| VIT_13s0019g03580 | Unknown                                                | -         |
| VIT_13s0019g03590 | Catalytic                                              | AT3G54970 |
| VIT_13s0019g03600 | Nuclear transcription factor Ysubunit B-8              | AT2G37060 |
| VIT_13s0019g03610 | RNA recognition motif (RRM)-containing protein         | AT3G54770 |
| VIT_13s0019g03620 | PWWP domain-containing protein                         | AT3G09670 |
| VIT_13s0019g03630 | Unknown                                                | -         |

|                   |                                                    |           |
|-------------------|----------------------------------------------------|-----------|
| VIT_13s0019g03640 | Ribosomal protein S23 (RPS23B) 40S                 | AT5G02960 |
| VIT_13s0019g03650 | RARE-cold-inducible 2A                             | AT2G38905 |
| VIT_13s0019g03660 | Unknown protein                                    | AT5G51960 |
| VIT_13s0019g03670 | Unknown protein                                    | AT5G63220 |
| VIT_13s0019g03680 | Unknown protein                                    | AT2G35820 |
| VIT_13s0019g03690 | fertility restorer salt-inducible                  | AT2G16880 |
| VIT_13s0019g03700 | Lateral organ boundaries protein 1                 | AT1G07900 |
| VIT_13s0019g03710 | Lateral organ boundaries protein 1                 | AT1G07900 |
| VIT_13s0019g03720 | Lateral organ boundaries protein 11                | AT2G28500 |
| VIT_13s0019g03730 | No hit                                             | -         |
| VIT_13s0019g03750 | Lateral organ boundaries protein 11                | AT2G28500 |
| VIT_13s0019g03760 | Lateral organ boundaries protein 11                | AT2G28500 |
| VIT_13s0019g03770 | DNA-directed RNA polymerase subunit beta'          | -         |
| VIT_13s0019g03780 | Lateral organ boundaries protein 11                | AT2G28500 |
| VIT_13s0019g03800 | Lateral organ boundaries protein 1                 | AT1G07900 |
| VIT_13s0019g03810 | Lateral organ boundaries protein 1                 | AT1G07900 |
| VIT_13s0019g03820 | Lateral organ boundaries protein 11                | AT2G28500 |
| VIT_13s0019g03830 | Lateral organ boundaries protein 11                | AT2G28500 |
| VIT_13s0019g03840 | Lateral organ boundaries protein 1                 | AT1G07900 |
| VIT_13s0019g03860 | F-type H <sup>+</sup> -transporting ATPase d chain | AT3G52300 |
| VIT_13s0019g03870 | Substrate carrier, Mitochondrial                   | AT2G35800 |
| VIT_13s0019g03880 | DnaJ homolog, subfamily C, member 19               | AT2G35795 |
| VIT_13s0019g03890 | Calmodulin binding protein                         | AT5G03040 |
| VIT_13s0019g03910 | Unknown                                            | -         |
| VIT_13s0019g03920 | Elongation factor 1-alpha 1                        | AT5G60390 |
| VIT_13s0019g03930 | No hit                                             | -         |
| VIT_13s0019g03940 | Unknown protein                                    | AT2G35790 |
| VIT_13s0019g03950 | DNA-binding bromodomain-containing                 | AT2G34900 |
| VIT_13s0019g03960 | Alpha-taxilin                                      | AT5G50840 |
| VIT_13s0019g03970 | Ribosomal protein P0 (RPP0A) acidic 60S            | AT2G40010 |
| VIT_13s0019g03980 | Transcription initiation factor TFIIF beta subunit | AT3G52270 |
| VIT_13s0019g03990 | Unknown protein                                    | AT4G25030 |
| VIT_13s0019g04000 | Pseudouridine synthase, RluA                       | AT3G52260 |
| VIT_13s0019g04010 | Myb family transcription factor                    | AT3G52250 |
| VIT_13s0019g04020 | CTP synthase                                       | AT3G12670 |
| VIT_13s0019g04030 | Serine carboxypeptidase SCPL27                     | AT3G07990 |
| VIT_13s0019g04040 | Serine carboxypeptidase 28 (SCPL28)                | AT2G35770 |
| VIT_13s0019g04050 | TET6 (tetraspanin6)                                | AT3G12090 |
| VIT_13s0019g04060 | MLO1                                               | AT1G61560 |
| VIT_13s0019g04070 | MLO1                                               | AT2G39200 |

|                   |                                                          |           |
|-------------------|----------------------------------------------------------|-----------|
| VIT_13s0019g04080 | Protein transport protein Sec61 subunit beta             | AT5G60460 |
| VIT_13s0019g04090 | Ubiquitin-conjugating enzyme E2 C                        | AT1G50490 |
| VIT_13s0019g04100 | Zinc finger (C3HC4-type ring finger)                     | AT2G37150 |
| VIT_13s0019g04110 | Retrotransposon protein                                  | -         |
| VIT_13s0019g04120 | Rhomboid                                                 | AT3G07950 |
| VIT_13s0019g04130 | AarF domain containing kinase                            | AT2G39190 |
| VIT_13s0019g04140 | LHCA1                                                    | AT3G54890 |
| VIT_13s0019g04150 | Receptor protein kinase CRINKLY4 precursor               | AT2G39180 |
| VIT_13s0019g04160 | Protein kinase                                           | AT1G16670 |
| VIT_13s0019g04170 | Para-aminobenzoate (PABA) synthase                       | AT2G28880 |
| VIT_13s0019g04180 | Aminodeoxychorismate synthase/glutamine amidotransferase | AT2G28880 |
| VIT_13s0019g04190 | Chorismate synthase 1, chloroplast precursor             | AT1G48850 |
| VIT_13s0019g04200 | Patatin                                                  | AT3G54950 |
| VIT_13s0019g04210 | No hit                                                   | -         |
| VIT_13s0019g04220 | Tryptophan/tyrosine permease family                      | AT5G19500 |
| VIT_13s0019g04230 | V-type H <sup>+</sup> -transporting ATPase subunit G     | AT3G01390 |
| VIT_13s0019g04240 | Protein disulfide-isomerase A1                           | AT5G60640 |
| VIT_13s0019g04250 | Unknown protein                                          | AT5G14990 |
| VIT_13s0019g04260 | Monoglyceride lipase                                     | AT5G19290 |
| VIT_13s0019g04270 | No hit                                                   | -         |
| VIT_13s0019g04280 | Aquaporin PIP2B                                          | AT2G37170 |
| VIT_13s0019g04290 | No hit                                                   | -         |
| VIT_13s0019g04300 | Ribosomal protein L12 (RPL12A) 60S                       | AT2G37190 |
| VIT_13s0019g04310 | DCP2 (decapping 2)                                       | AT5G13570 |
| VIT_17s0000g05170 | No hit                                                   | -         |
| VIT_17s0000g05180 | Unknown                                                  | -         |
| VIT_17s0000g05190 | Unknown protein                                          | AT3G26850 |
| VIT_17s0000g05200 | NLI interacting factor (NIF) family protein              | AT3G29760 |
| VIT_17s0000g05210 | LNG1 (LONGIFOLIA1)                                       | AT1G74160 |
| VIT_17s0000g05220 | TCP family transcription factor TCP5                     | AT5G60970 |
| VIT_17s0000g05230 | Unknown protein                                          | AT5G08060 |
| VIT_17s0000g05240 | Nuclear transport factor 2 (NTF2)                        | AT5G60980 |
| VIT_17s0000g05250 | Unknown protein                                          | AT5G08050 |
| VIT_17s0000g05260 | Unknown protein                                          | -         |
| VIT_17s0000g05270 | Unknown protein                                          | AT4G14840 |
| VIT_17s0000g05280 | UPF0737 protein AFP3                                     | -         |
| VIT_17s0000g05290 | Pre-mRNA cleavage complex II protein Clp1                | AT5G11010 |
| VIT_17s0000g05300 | Pre-mRNA cleavage complex II protein Clp1                | AT5G11010 |
| VIT_17s0000g05310 | Pre-mRNA cleavage complex II protein Clp1                | AT5G11010 |
| VIT_17s0000g05320 | IFA binding protein                                      | AT1G74830 |

|                   |                                                                       |           |
|-------------------|-----------------------------------------------------------------------|-----------|
| VIT_17s0000g05330 | Serine/threonine protein phosphatase PP2A-5 catalytic subunit (PP2A5) | AT1G10430 |
| VIT_17s0000g05350 | 5-formyltetrahydrofolate cycloligase                                  | AT5G13050 |
| VIT_17s0000g05360 | Germin                                                                | AT1G18980 |
| VIT_17s0000g05370 | MYC ZCW32 (bigpetal, bigpetalub)                                      | AT5G62610 |
| VIT_17s0000g05380 | Dynein light chain LC8-type                                           | AT5G20110 |
| VIT_17s0000g05390 | Unknown protein                                                       | AT3G47850 |
| VIT_17s0000g05400 | Myb domain protein 35                                                 | AT3G28470 |
| VIT_17s0000g05410 | Galactosyltransferase                                                 | AT1G74800 |
| VIT_17s0000g05420 | AAA-type ATPase family                                                | AT3G28510 |
| VIT_17s0000g05430 | Aminoacyl-tRNA synthetase                                             | AT1G18950 |
| VIT_17s0000g05440 | Unknown protein                                                       | AT1G74790 |
| VIT_17s0000g05450 | ELF5 (early flowering 5)                                              | AT5G62640 |
| VIT_17s0000g05460 | Nodulin                                                               | AT1G74780 |
| VIT_17s0000g05470 | Nodulin                                                               | AT1G74780 |
| VIT_17s0000g05480 | EMB2454 (embryo defective 2454)                                       | AT1G18920 |
| VIT_17s0000g05490 | Lateral organ boundaries domain family protein (LBD27)                | AT3G47870 |
| VIT_17s0000g05500 | Cysteine endopeptidase                                                | AT3G47910 |
| VIT_17s0000g05510 | Pentatricopeptide (PPR) repeat-containing protein                     | AT1G74750 |
| VIT_17s0000g05520 | Calcium-dependent protein kinase 30 CPK30                             | AT1G18890 |
| VIT_17s0000g05530 | DnaJ homolog, subfamily B, member 4                                   | AT3G47940 |
| VIT_17s0000g05540 | H (+)-ATPase 11 AHA11                                                 | AT5G62670 |
| VIT_17s0000g05550 | Proton-dependent oligopeptide transport (POT) family protein          | AT5G62680 |
| VIT_17s0000g05560 | Proton-dependent oligopeptide transport (POT) family protein          | AT5G28470 |
| VIT_17s0000g05570 | Receptor protein kinase                                               | AT5G62710 |
| VIT_17s0000g05580 | Isopiperitenol dehydrogenase                                          | AT2G47140 |
| VIT_17s0000g05600 | (-)-isopiperitenol dehydrogenase                                      | AT2G47140 |
| VIT_17s0000g05610 | Isopiperitenol dehydrogenase                                          | AT2G47140 |
| VIT_17s0000g05620 | Integral membrane HPP family protein                                  | AT5G62720 |
| VIT_17s0000g05630 | Homeodomain leucine zipper protein HB-1                               | AT3G01470 |
| VIT_17s0000g05640 | Nitrate transporter 1:2                                               | AT1G69850 |
| VIT_17s0000g05650 | Unknown protein                                                       | AT1G74730 |
| VIT_17s0000g05660 | Polygalacturonase GH28                                                | AT1G23460 |
| VIT_17s0000g05670 | Polygalacturonase GH28                                                | AT3G15720 |
| VIT_17s0000g05680 | Band 7 family                                                         | AT5G62740 |
| VIT_17s0000g05690 | Isochorismate synthase 1, chloroplast precursor                       | AT3G01280 |
| VIT_17s0000g05700 | Phosphoribosylanthranilate transferase                                | AT1G74720 |
| VIT_17s0000g05710 | Unknown                                                               | -         |
| VIT_17s0000g05720 | No hit                                                                | -         |
| VIT_17s0000g05730 | No hit                                                                | -         |
| VIT_17s0000g05740 | Pectate lyase, N-terminal                                             | AT3G01270 |

|                   |                                                                   |           |
|-------------------|-------------------------------------------------------------------|-----------|
| VIT_17s0000g05750 | Isochorismate synthase (ICS1/SID2) (ICS2)                         | AT1G18870 |
| VIT_17s0000g05760 | Nuclear protein ZAP                                               | AT5G62760 |
| VIT_17s0000g05770 | Nuclear ribonuclease Z                                            | AT1G74700 |
| VIT_17s0000g05780 | Unknown protein                                                   | AT1G18850 |
| VIT_17s0000g05790 | Cupin, RmlC-type                                                  | AT5G39890 |
| VIT_17s0000g05800 | Delta-1-pyrroline-5-carboxylate dehydrogenase (P5CDH)             | AT5G62530 |
| VIT_17s0000g05810 | WRKY DNA-binding protein 72                                       | AT5G15130 |
| VIT_17s0000g05820 | Ubiquitin-conjugating enzyme E2 A                                 | AT2G02760 |
| VIT_17s0000g05830 | Unknown protein                                                   | AT5G62550 |
| VIT_17s0000g05840 | Calmodulin binding IQD31 (IQ-domain 31)                           | AT1G74690 |
| VIT_17s0000g05850 | ATATH1 (ABC2 homolog1)                                            | AT3G47730 |
| VIT_17s0000g05860 | ATATH6 (ABC2 homolog 6)                                           | AT3G47780 |
| VIT_17s0000g05870 | Aldose 1-epimerase protein                                        | AT3G47800 |
| VIT_17s0000g05880 | Calcineurin phosphoesterase                                       | AT3G47810 |
| VIT_17s0000g05890 | Protein kinase APK1B                                              | AT2G02800 |
| VIT_17s0000g05900 | Basic helix-loop-helix (bHLH) family                              | AT1G74500 |
| VIT_17s0000g05910 | No hit                                                            | -         |
| VIT_17s0000g05920 | Kelch repeat-containing F-box protein                             | AT1G74510 |
| VIT_17s0000g05930 | No hit                                                            | -         |
| VIT_17s0000g05940 | Chromosome structural maintenance protein MAG2                    | AT3G47700 |
| VIT_17s0000g05950 | PRE1 (Paclobutrazol resistance1)                                  | AT3G28857 |
| VIT_17s0000g05960 | Pectinesterase family                                             | -         |
| VIT_17s0000g05970 | Ribosomal protein S9 (RPS9C) 40S                                  | AT5G39850 |
| VIT_17s0000g05980 | Zinc finger protein / regulator of chromosome condensation (RCC1) | AT5G19420 |
| VIT_17s0000g05990 | ABA-responsive protein (HVA22a)                                   | AT1G74520 |
| VIT_17s0000g06000 | Basic helix-loop-helix (bHLH) family                              | AT3G47640 |
| VIT_17s0000g06010 | Unknown protein                                                   | AT1G74530 |
| VIT_17s0000g06020 | TCP family transcription factor TCP14                             | AT3G47620 |
| VIT_17s0000g06030 | Nucleosome assembly protein (NAP-related) NRP2                    | AT1G74560 |
| VIT_17s0000g06040 | Phytochrome kinase substrate 1                                    | AT1G18810 |
| VIT_17s0000g06050 | Ankyrin protein kinase                                            | AT1G26850 |
| VIT_17s0000g06060 | Transcription regulator/ zinc ion binding                         | AT3G47610 |
| VIT_17s0000g06070 | No hit                                                            | -         |
| VIT_17s0000g06080 | No hit                                                            | -         |
| VIT_17s0000g06090 | Pentatricopeptide (PPR) repeat-containing protein                 | AT1G74580 |
| VIT_17s0000g06100 | Pentatricopeptide (PPR) repeat-containing protein                 | AT1G74600 |
| VIT_17s0000g06110 | Glutathione S-transferase 9 GSTU9                                 | AT5G62480 |
| VIT_17s0000g06120 | Glutathione S-transferase 9 GSTU9                                 | AT5G62480 |
| VIT_17s0000g06130 | Glutathione S-transferase 9 GSTU9                                 | AT5G62480 |
| VIT_17s0000g06140 | Glutathione S-transferase 9 GSTU9                                 | AT5G62480 |

|                   |                                                        |           |
|-------------------|--------------------------------------------------------|-----------|
| VIT_17s0000g06150 | Glutathione S-transferase 9 GSTU9                      | AT5G62480 |
| VIT_17s0000g06170 | Pentatricopeptide (PPR) repeat-containing              | AT1G74630 |
| VIT_17s0000g06180 | Hydrolase, alpha/beta fold                             | AT1G74640 |
| VIT_17s0000g06190 | Myb domain protein 94                                  | AT1G74650 |
| VIT_17s0000g06200 | Mini zinc finger 1 MIF1                                | AT1G74660 |
| VIT_17s0000g06210 | GASA like                                              | AT1G74670 |
| VIT_17s0000g06220 | Exostosin                                              | AT1G74680 |
| VIT_17s0000g06230 | Zinc finger (C3HC4-type ring finger)                   | AT5G62460 |
| VIT_17s0000g06240 | Unknown protein                                        | AT5G62440 |
| VIT_17s0000g06250 | RWP-RK domain-containing protein                       | AT1G18790 |
| VIT_17s0000g06260 | Pentatricopeptide (PPR) repeat-containing protein      | AT3G47530 |
| VIT_17s0000g06270 | Malate dehydrogenase precursor                         | AT3G47520 |
| VIT_17s0000g06280 | Geranylgeranyl reductase                               | AT1G74470 |
| VIT_17s0000g06290 | Lipase GDSL                                            | AT1G74460 |
| VIT_17s0000g06300 | No hit                                                 | -         |
| VIT_17s0000g06310 | Cycling DOF factor 2                                   | AT3G47500 |
| VIT_17s0000g06320 | Endonuclease                                           | AT3G47490 |
| VIT_17s0000g06330 | Lipoate protein ligase                                 | AT3G29010 |
| VIT_17s0000g06340 | MADS-box agamous-like 30                               | AT1G18750 |
| VIT_17s0000g06350 | LHCA4 (Photosystem I light harvesting complex gene 4)  | AT3G47470 |
| VIT_17s0000g06360 | Alpha-expansin 3                                       | AT1G69530 |
| VIT_17s0000g06370 | Thioredoxin 2                                          | AT1G08570 |
| VIT_17s0000g06380 | YGL010w                                                | AT1G18720 |
| VIT_17s0000g06390 | Pentatricopeptide (PPR) repeat-containing protein      | AT1G59720 |
| VIT_17s0000g06400 | NAC domain containing protein 100                      | AT5G61430 |
| VIT_17s0000g06410 | MYB transcription factor MIXTA-like 2                  | AT3G01140 |
| VIT_17s0000g06420 | Galactosyl transferase GMA12/MNN10                     | AT1G18700 |
| VIT_17s0000g06430 | Peptidyl-prolyl cis-trans isomerase NIMA-interacting 4 | AT1G26550 |
| VIT_17s0000g06440 | Galactoside 2-alpha-L-fucosyltransferase               | AT2G03220 |
| VIT_17s0000g06450 | Ribulose-phosphate 3-epimerase, chloroplast precursor  | AT5G61410 |
| VIT_17s0000g06460 | Zinc finger (C3HC4-type ring finger)                   | AT1G74410 |
| VIT_17s0000g06470 | Pentatricopeptide (PPR) repeat-containing protein      | AT5G61400 |
| VIT_17s0000g06480 | Pentatricopeptide (PPR) repeat-containing protein      | -         |
| VIT_17s0000g06490 | MKK5                                                   | -         |
| VIT_17s0000g06500 | Pentatricopeptide (PPR) repeat-containing              | AT5G66520 |
| VIT_17s0000g06510 | Exonuclease                                            | AT5G61390 |
| VIT_17s0000g06520 | Timing of CAB expression 1                             | AT5G61380 |
| VIT_17s0000g06530 | No hit                                                 | -         |
| VIT_17s0000g06540 | Exonuclease                                            | -         |
| VIT_17s0000g06550 | Exonuclease                                            | -         |

|                   |                                                          |           |
|-------------------|----------------------------------------------------------|-----------|
| VIT_17s0000g06560 | Retrovirus Pol polyprotein from transposon TNT 1-94      | AT3G29785 |
| VIT_17s0000g06570 | Timing of CAB expression 1 protein                       | AT5G61380 |
| VIT_17s0000g06580 | Vesicle transport v-SNARE 11                             | AT5G39510 |
| VIT_17s0000g06590 | Galactosyl transferase GMA12/MNN10                       | AT1G74380 |
| VIT_17s0000g06600 | No hit                                                   | -         |
| VIT_17s0000g06610 | Zinc finger (C3HC4-type ring finger)                     | AT1G18660 |
| VIT_17s0000g06620 | Protein kinase pto                                       | AT5G61350 |
| VIT_17s0000g06630 | Unknown protein                                          | AT5G61340 |
| VIT_17s0000g06640 | formin-2                                                 | AT2G25050 |
| VIT_17s0000g06650 | IBS1 (impaired in baba-induced sterility 1)              | AT1G18670 |
| VIT_17s0000g06660 | HNH endonuclease domain-containing protein               | AT1G18680 |
| VIT_17s0000g06670 | Translation initiation factor eIF-5A                     | AT1G13950 |
| VIT_17s0000g06680 | Unknown protein                                          | AT2G03350 |
| VIT_17s0000g06690 | Unknown                                                  | -         |
| VIT_17s0000g06700 | No hit                                                   | -         |
| VIT_17s0000g06710 | Leucine-rich repeat transmembrane protein kinase         | AT1G74360 |
| VIT_17s0000g06720 | No hit                                                   | -         |
| VIT_17s0000g06730 | No hit                                                   | -         |
| VIT_17s0000g06740 | Zinc finger (C2H2 type) family                           | -         |
| VIT_17s0000g06750 | Unknown protein                                          | AT3G25400 |
| VIT_17s0000g06760 | Unknown protein                                          | AT1G69360 |
| VIT_17s0000g06770 | Pentatricopeptide (PPR) repeat-containing protein        | AT2G02980 |
| VIT_17s0000g06780 | Dimethylaniline monooxygenase                            | AT5G07800 |
| VIT_17s0000g06790 | flavin-containing monooxygenase                          | AT5G07800 |
| VIT_17s0000g06800 | Unknown protein                                          | -         |
| VIT_17s0000g06810 | Myb family transcription factor / ELM2 domain-containing | AT1G26580 |
| VIT_17s0000g06820 | Zinc finger (C2H2 type) family                           | AT1G26610 |
| VIT_17s0000g06830 | Zinc finger (C2H2 type) family                           | -         |
| VIT_17s0000g06840 | Unknown protein                                          | AT5G07890 |
| VIT_17s0000g06850 | No hit                                                   | -         |
| VIT_17s0000g06860 | SNAP25ous protein SNAP30                                 | AT5G61210 |
| VIT_17s0000g06870 | Oxidoreductase, acting on NADH or NADPH                  | AT5G61220 |
| VIT_17s0000g06880 | Heparanase protein 2 precursor                           | AT5G07830 |
| VIT_17s0000g06890 | Unknown protein                                          | -         |
| VIT_17s0000g06900 | DNA helicase SNF2 domain-containing protein              | AT5G07810 |
| VIT_17s0000g06920 | Remorin                                                  | -         |
| VIT_17s0000g06930 | Unfertilized embryo sac 10 UNE10                         | AT4G00050 |
| VIT_17s0000g06940 | LAP4 protein                                             | AT5G07910 |
| VIT_17s0000g06950 | DEAH (Asp-Glu-Ala-His) box polypeptide 16                | AT1G32490 |
| VIT_17s0000g06960 | UDP-glucose 6-dehydrogenase                              | AT5G15490 |

|                   |                                               |           |
|-------------------|-----------------------------------------------|-----------|
| VIT_17s0000g06970 | Diacylglycerol kinase 1                       | AT5G07920 |
| VIT_17s0000g06980 | Ribosomal protein S19 (RPS19C) 40S            | AT5G61170 |
| VIT_17s0000g06990 | Ribosomal protein L2                          | ATCG01310 |
| VIT_17s0000g07000 | VIP4                                          | AT5G61150 |
| VIT_17s0000g07010 | 5-azacytidine resistance                      | -         |
| VIT_17s0000g07020 | Cis-zeatin O-beta-D-glucosyltransferase       | AT3G02100 |
| VIT_17s0000g07030 | Cis-zeatin O-beta-D-glucosyltransferase       | AT3G02100 |
| VIT_17s0000g07060 | UDP-glucosyltransferase HRA25                 | AT3G02100 |
| VIT_17s0000g07070 | UDP-glucuronosyl and UDP-glucosyl transferase | AT3G02100 |
| VIT_17s0000g07080 | UDP-glucosyltransferase HRA25                 | AT3G02100 |
| VIT_17s0000g07090 | UDP-glucuronosyl and UDP-glucosyl transferase | AT3G02100 |
| VIT_17s0000g07100 | UDP-glucosyltransferase HRA25                 | AT3G02100 |
| VIT_17s0000g07120 | Unknown protein                               | AT5G07960 |
| VIT_17s0000g07130 | Unknown protein                               | AT5G07950 |
| VIT_17s0000g07140 | Unknown protein                               | AT5G07950 |

---



**F<sub>ST</sub> Wine & Table**

| <b>Gene stable ID</b> | <b>Functional annotation</b>                              | <b>Arabidopsis homolog</b> |
|-----------------------|-----------------------------------------------------------|----------------------------|
| VIT_01s0011g00010     | Transcription initiation factor IIE (TFIIE) alpha subunit | AT1G03280                  |
| VIT_01s0011g00030     | ACT domain containing protein (ACR4)                      | AT1G69040                  |
| VIT_01s0011g00040     | No hit                                                    | -                          |
| VIT_01s0011g00050     | Heat shock protein binding                                | AT1G69060                  |
| VIT_01s0011g00060     | No hit                                                    | -                          |
| VIT_01s0011g00070     | Nucleolar complex protein 14 nop14                        | AT1G69070                  |
| VIT_01s0011g00080     | Universal stress protein (USP) family protein             | AT2G03720                  |
| VIT_01s0011g00090     | Zinc finger (C3HC4-type ring finger)                      | AT5G15790                  |
| VIT_01s0011g00100     | MADS-box APETALA 1                                        | AT1G69120                  |
| VIT_01s0011g00110     | SEPALLATA1                                                | AT5G15800                  |
| VIT_01s0011g00120     | Unknown protein                                           | AT1G69160                  |
| VIT_01s0011g00130     | Squamosa promoter-binding protein 6 (SPL6)                | AT1G69170                  |
| VIT_01s0011g00140     | CRABS CLAW                                                | AT1G69180                  |
| VIT_01s0011g00150     | Unknown protein                                           | AT1G26330                  |
| VIT_01s0011g00160     | Alpha-1,4-glucan-protein synthase                         | AT3G08900                  |
| VIT_01s0011g00170     | Brassinosteroid-6-oxidase [Vitis vinifera]                | AT5G38970                  |
| VIT_01s0011g00190     | Brassinosteroid-6-oxidase [Vitis vinifera]                | AT3G30180                  |
| VIT_01s0011g00210     | Cytochrome b5 isoform Cb5-D                               | AT1G26340                  |
| VIT_01s0011g00230     | Dihydropterin pyrophosphokinase /dihydropteroate synthase | AT4G30000                  |
| VIT_01s0011g00240     | Fructokinase-2                                            | AT1G69200                  |
| VIT_01s0011g00250     | 6-phosphogluconolactonase                                 | AT1G13700                  |
| VIT_01s0011g00280     | feronia receptor-like kinase                              | AT3G51550                  |
| VIT_01s0011g00290     | Unknown protein                                           | AT1G69210                  |
| VIT_01s0011g00300     | SIK1 (serine/threonine kinase 1)                          | AT1G69220                  |
| VIT_01s0011g00340     | Glycosyl hydrolase family 28 protein                      | AT1G78400                  |
| VIT_01s0011g00350     | CYP78A5                                                   | AT1G13710                  |
| VIT_01s0011g00370     | SP1L2 (SPIRAL2)                                           | -                          |
| VIT_01s0011g00380     | SP1L1 (SPIRAL1-like1)                                     | AT3G29770                  |
| VIT_01s0011g00390     | Asparagine synthase                                       | AT2G03667                  |
| VIT_01s0011g00400     | Nuclear transport factor 2 (NTF2)                         | AT5G60980                  |
| VIT_01s0011g00410     | Nuclear transport factor 2 (NTF2)                         | AT1G13740                  |
| VIT_01s0011g00420     | RPK1 (receptor-like protein kinase 1)                     | AT3G02130                  |
| VIT_01s0011g00440     | Unknown                                                   | -                          |
| VIT_01s0011g00450     | Magnesium transporter CorA                                | AT2G03620                  |
| VIT_01s0011g00460     | Unknown protein                                           | AT5G61040                  |
| VIT_01s0011g00470     | Metallophosphatase                                        | AT1G13750                  |
| VIT_01s0011g00490     | Pentatricopeptide (PPR) repeat-containing protein         | AT1G69290                  |

|                   |                                                                      |           |
|-------------------|----------------------------------------------------------------------|-----------|
| VIT_01s0011g00500 | RUS1 (Root uvb sensitive 1)                                          | AT1G13770 |
| VIT_01s0011g00510 | Unknown protein                                                      | AT1G26750 |
| VIT_01s0011g00520 | Pentatricopeptide (PPR) repeat-containing                            | AT1G26500 |
| VIT_01s0011g00530 | Ureide permease 2 (AtUPS2)                                           | AT2G03530 |
| VIT_01s0011g00540 | SPFH domain-containing protein 2 precursor band 7 family             | AT2G03510 |
| VIT_01s0011g00550 | Hydrolase, alpha/beta fold family                                    | AT1G13820 |
| VIT_01s0011g00570 | Glucan endo-1,3-beta-glucosidase 3 precursor                         | -         |
| VIT_01s0011g00580 | Pentatricopeptide (PPR) repeat-containing protein                    | AT1G26460 |
| VIT_01s0011g00590 | Acclimation of photosynthesis to environment                         | AT5G46110 |
| VIT_01s0011g00600 | Acclimation of photosynthesis to environment                         | AT5G46110 |
| VIT_01s0011g00610 | Unknown protein                                                      | AT1G26470 |
| VIT_04s0008g04590 | CXE carboxylesterase                                                 | AT3G27320 |
| VIT_04s0008g04600 | Expansin family protein (EXPR3)                                      | -         |
| VIT_04s0008g04610 | PDE247 (pigment defective 247)                                       | AT2G20540 |
| VIT_04s0008g04620 | Expansin family protein (EXPR3)                                      | -         |
| VIT_04s0008g04630 | Pentatricopeptide repeat-containing protein                          | AT2G20540 |
| VIT_04s0008g04640 | Pentatricopeptide repeat-containing protein                          | AT2G20540 |
| VIT_04s0008g04670 | Blight-associated protein p12 precursor                              | -         |
| VIT_04s0008g04680 | No hit                                                               | -         |
| VIT_04s0008g04690 | Proteasome 26S AAA-ATPase subunit (RPT6a)                            | AT5G19990 |
| VIT_04s0008g04700 | Histone H2A variant 3 HTA9                                           | AT1G52740 |
| VIT_04s0008g04710 | Beta-ketoacyl-CoA synthase                                           | AT2G26640 |
| VIT_04s0008g04720 | Endonuclease/exonuclease/phosphatase family protein                  | AT5G11350 |
| VIT_04s0008g04730 | Unknown protein                                                      | AT2G25605 |
| VIT_04s0008g04740 | GCN5 N-acetyltransferase (GNAT)                                      | AT5G11340 |
| VIT_04s0008g04750 | Monoxygenase                                                         | AT5G11330 |
| VIT_04s0008g04760 | V-type H <sup>+</sup> -transporting ATPase 21kDa proteolipid subunit | AT4G32530 |
| VIT_04s0008g04770 | Zinc finger protein VAR3, chloroplastic                              | -         |
| VIT_04s0008g04780 | Protein phosphatase 2C DBP                                           | AT2G25620 |
| VIT_04s0008g04790 | ABC transporter g family pleiotropic drug resistance 12 PDR12        | AT1G15520 |
| VIT_04s0008g04800 | Transferase                                                          | AT4G29250 |
| VIT_04s0008g04810 | Unknown                                                              | ATCG00480 |
| VIT_04s0008g04820 | ABC transporter g family pleiotropic drug resistance 12 PDR12        | AT1G15520 |
| VIT_04s0008g04830 | ABC transporter g family pleiotropic drug resistance 12 PDR12        | AT1G15520 |
| VIT_04s0008g04840 | ABC transporter g family pleiotropic drug resistance 12 PDR12        | AT4G00980 |
| VIT_04s0008g04860 | No hit                                                               | -         |
| VIT_04s0008g04870 | flavin monooxygenase-like protein                                    | AT5G11320 |
| VIT_04s0008g04880 | Indole-3-acetic acid-amido synthetase GH3.1                          | -         |
| VIT_04s0008g04890 | WD-40 repeat protein (LEUNIG)                                        | AT4G32551 |
| VIT_04s0008g04900 | WD-40 repeat protein (LEUNIG)                                        | AT4G32551 |

|                   |                                                                |           |
|-------------------|----------------------------------------------------------------|-----------|
| VIT_04s0008g04910 | WD-40 repeat protein (LEUNIG)                                  | AT4G32551 |
| VIT_04s0008g04920 | 2-oxoglutarate-dependent dioxygenase                           | AT1G52820 |
| VIT_04s0008g04930 | Paramyosin                                                     | AT4G32560 |
| VIT_04s0008g04940 | Gibberellin 3beta-hydroxylase3                                 | AT1G15550 |
| VIT_04s0008g04950 | TIFY 8                                                         | AT4G32570 |
| VIT_04s0008g04960 | Pentatricopeptide (PPR) repeat-containing protein              | AT5G11310 |
| VIT_04s0008g04970 | 1-deoxy-D-xylulose-5-phosphate synthase, chloroplast precursor | AT5G11380 |
| VIT_04s0008g04980 | Boron transporter-like protein 4                               | AT1G15460 |
| VIT_04s0008g04990 | Potassium channel AKT1                                         | AT2G26650 |
| VIT_04s0008g05000 | Ubiquinol-cytochrome c reductase subunit 7                     | AT4G32470 |
| VIT_04s0008g05010 | Unknown protein                                                | AT5G11420 |
| VIT_04s0008g05020 | Ras GTP-binding protein (RAN3)                                 | AT5G20020 |
| VIT_04s0008g05030 | Ras GTP-binding protein (RAN3)                                 | AT5G55190 |
| VIT_04s0008g05040 | Agenet domain-containing protein                               | AT4G32440 |
| VIT_04s0008g05050 | Pentatricopeptide (PPR) repeat-containing protein              | AT3G54980 |
| VIT_04s0008g05060 | C-5 cytosine-specific DNA methylase                            | AT5G25480 |
| VIT_04s0008g05070 | Pentatricopeptide (PPR) repeat-containing                      | AT2G25580 |
| VIT_04s0008g05080 | Ammonium transporter 2                                         | AT2G38290 |
| VIT_04s0008g05090 | Peptidyl-prolyl isomerase D (cyclophilin D)                    | AT4G32420 |
| VIT_04s0008g05100 | Cytochrome c oxidase subunit Vb                                | AT3G15640 |
| VIT_04s0008g05110 | Unknown                                                        | -         |
| VIT_04s0008g05120 | Phospholipase/carboxylesterase                                 | AT5G20060 |
| VIT_04s0008g05130 | TSO1 (chinese for 'ugly')                                      | AT3G22780 |
| VIT_04s0008g05140 | TSO1 (chinese for 'ugly')                                      | AT3G22780 |
| VIT_04s0008g05150 | Zinc finger (Ran-binding)                                      | AT3G15680 |
| VIT_04s0008g05160 | Unknown protein                                                | AT4G31980 |
| VIT_04s0008g05170 | Unknown protein                                                | AT4G31980 |
| VIT_04s0008g05180 | Ankyrin                                                        | AT5G11280 |
| VIT_04s0008g05190 | Overexpressor of cationic peroxidase 3 (OCP3)                  | AT5G11270 |
| VIT_04s0008g05200 | No hit                                                         | -         |
| VIT_04s0008g05210 | BZIP protein HY5 (HY5)                                         | AT5G11260 |
| VIT_04s0008g05220 | Cellulose synthase CESA1                                       | AT4G32410 |
| VIT_04s0008g05240 | Brittle 1 protein                                              | AT4G32400 |
| VIT_04s0008g05250 | Expansin family protein (EXPR3)                                | AT2G18660 |
| VIT_04s0008g05260 | Unknown                                                        | -         |
| VIT_04s0008g05270 | ATPase AFG1                                                    | AT2G25530 |
| VIT_04s0008g05280 | CRR2 (chlororespiratory reduction 2)                           | AT4G21065 |
| VIT_04s0008g05290 | No hit                                                         | -         |
| VIT_04s0008g05300 | Phosphate translocator                                         | AT4G32390 |
| VIT_04s0008g05310 | Nod-factor receptor 1b                                         | AT1G51940 |

|                   |                                                                   |           |
|-------------------|-------------------------------------------------------------------|-----------|
| VIT_04s0008g05320 | Concanavalin A lectin                                             | AT5G10530 |
| VIT_04s0008g05330 | DEAD box RNA helicase RH15                                        | AT5G11200 |
| VIT_04s0008g05340 | Bundle-sheath defective protein 2                                 | AT3G47650 |
| VIT_04s0008g05350 | Serine hydrolase [Vitis vinifera]                                 | AT5G16080 |
| VIT_04s0008g05360 | Serine hydrolase [Vitis vinifera]                                 | AT5G16080 |
| VIT_04s0008g05370 | Serine hydrolase [Vitis vinifera]                                 | AT5G16080 |
| VIT_04s0008g05380 | Serine hydrolase [Vitis vinifera]                                 | AT5G16080 |
| VIT_04s0008g05390 | Carboxyesterase17 CXE17                                           | AT5G16080 |
| VIT_04s0008g05400 | Serine hydrolase [Vitis vinifera]                                 | AT5G16080 |
| VIT_04s0008g05410 | Serine hydrolase [Vitis vinifera]                                 | AT5G16080 |
| VIT_04s0008g05420 | SPX2 (SYG1/Pho81/XPR1) domain-containing protein SPX2             | AT2G26660 |
| VIT_04s0008g05430 | RDR6 (RNA-dependent RNA polymerase 6)                             | AT3G49500 |
| VIT_04s0008g05440 | Ethylene-responsive transcription factor SHINE 3                  | AT5G11190 |
| VIT_04s0008g05450 | Phospholipase D alpha 1 precursor (PLD 1) (Choline phosphatase 1) | AT3G15730 |
| VIT_04s0008g05460 | Unknown protein                                                   | AT5G25360 |
| VIT_04s0008g05470 | EIN3-binding F-box protein 2                                      | AT2G25490 |
| VIT_04s0008g05480 | BRI1-KD interacting protein 118                                   | AT4G32330 |
| VIT_04s0008g05490 | L-ascorbate peroxidase.                                           | AT4G32320 |
| VIT_04s0008g05500 | S-receptor kinase                                                 | AT4G32300 |
| VIT_04s0008g05510 | SYNC1 protein, related                                            | AT3G11760 |
| VIT_04s0008g05520 | Unknown protein                                                   | AT3G24150 |
| VIT_04s0008g05530 | Unknown protein                                                   | AT4G32290 |
| VIT_04s0008g05540 | Clathrin assembly protein 2                                       | AT2G25430 |
| VIT_04s0008g05550 | SHR5-receptor-like kinase                                         | AT1G56130 |
| VIT_04s0008g05560 | IAA29                                                             | AT4G32280 |
| VIT_04s0008g05570 | UDP-glucuronic acid/UDP-N-acetylgalactosamine transporter         | AT4G32272 |
| VIT_04s0008g05580 | Unknown protein                                                   | AT4G32270 |
| VIT_04s0008g05590 | F-type H <sup>+</sup> -transporting ATPase b chain CfoII          | AT4G32260 |
| VIT_04s0008g05600 | KEG (keep on going)                                               | AT4G32250 |
| VIT_04s0008g05610 | Centromeric protein                                               | AT4G32190 |
| VIT_04s0008g05620 | Adenine phosphoribosyltransferase                                 | AT5G11160 |
| VIT_04s0008g05630 | Phox                                                              | AT2G25350 |
| VIT_04s0008g05640 | Protease inhibitor/seed storage/lipid transfer protein (LTP)      | AT4G12510 |
| VIT_04s0008g05650 | Vesicle-associated membrane protein 7                             | AT4G32150 |
| VIT_04s0008g05670 | FAR1-related sequence 6                                           | AT1G52520 |
| VIT_04s0008g05680 | No hit                                                            | -         |
| VIT_04s0008g05690 | Meprin and TRAFy domain-containing protein                        | AT2G25320 |
| VIT_04s0044g01000 | Pectinesterase family                                             | AT5G09760 |
| VIT_04s0044g01010 | Pectinesterase family                                             | AT5G09760 |
| VIT_04s0044g01020 | Pectinesterase family                                             | AT5G09760 |

|                   |                                                |           |
|-------------------|------------------------------------------------|-----------|
| VIT_04s0044g01030 | Pectinesterase family                          | AT5G09760 |
| VIT_04s0044g01040 | Basic helix-loop-helix (bHLH) family           | -         |
| VIT_04s0044g01060 | Leaf senescence related protein-like           | AT1G48880 |
| VIT_04s0044g01070 | Leaf senescence related protein-like           | AT1G48880 |
| VIT_04s0044g01080 | Pentatricopeptide (PPR) repeat                 | AT5G04780 |
| VIT_04s0044g01090 | Chromatin assembly factor-2 (FASCIATA2) (FAS2) | AT5G64630 |
| VIT_04s0044g01100 | Invertase/pectin methylesterase inhibitor      | AT5G64620 |
| VIT_04s0044g01110 | Alcohol dehydrogenase 6                        | AT1G77120 |
| VIT_04s0044g01120 | Alcohol dehydrogenase 2 [Vitis vinifera]       | AT1G77120 |
| VIT_04s0044g01130 | Alcohol dehydrogenase 2 [Vitis vinifera]       | AT1G77120 |
| VIT_04s0044g01140 | RNA-binding protein Y14                        | AT1G51510 |
| VIT_04s0044g01150 | Aminotransferase, class V                      | -         |
| VIT_04s0044g01160 | Aminotransferase, class V                      | -         |
| VIT_04s0044g01170 | Aminotransferase, class V                      | -         |
| VIT_04s0044g01180 | Cell division protease FtsH                    | AT5G64580 |
| VIT_04s0044g01190 | Maternal effect embryo arrest 50               | AT4G00231 |
| VIT_04s0044g01200 | Auxin-independent growth promoter              | AT5G64600 |
| VIT_04s0044g01210 | Phosphatidylinositol 4-kinase                  | AT5G64070 |
| VIT_04s0044g01220 | NAC domain containing protein 103              | AT5G64060 |
| VIT_04s0044g01230 | Unknown                                        | -         |
| VIT_04s0044g01240 | PRLI-interacting factor G                      | AT2G13690 |
| VIT_04s0044g01250 | No hit                                         | -         |
| VIT_04s0044g01260 | SEU3B protein                                  | AT1G43850 |
| VIT_04s0044g01270 | Calcineurin phosphoesterase                    | AT1G48120 |
| VIT_04s0044g01280 | Beta-1,3-glucan synthase                       | AT2G13680 |
| VIT_04s0044g01290 | MAP3Ka                                         | AT1G53570 |
| VIT_04s0044g01300 | DNA cross-link repair protein                  | AT1G19025 |
| VIT_04s0044g01310 | NADH-plastoquinone oxidoreductase subunit o    | AT1G74880 |
| VIT_04s0044g01320 | ABCNAP13                                       | AT4G33460 |
| VIT_04s0044g01330 | GDP-mannose transporter (GONST1)               | AT2G13650 |
| VIT_04s0044g01360 | Unknown protein                                | AT5G09310 |
| VIT_04s0044g01370 | SCL1 (scarecrow-like 1)                        | AT1G21450 |
| VIT_04s0044g01380 | Myb domain protein 52                          | AT1G73410 |
| VIT_04s0044g01410 | Photosystem I reaction center subunit N (PSAN) | AT5G64040 |
| VIT_04s0044g01420 | Polygalacturonase GH28                         | AT4G33440 |
| VIT_04s0044g01430 | Unknown protein                                | AT1G31130 |
| VIT_04s0044g01450 | Unknown protein                                | -         |
| VIT_04s0044g01460 | PUB26 (plant U- box 26)                        | -         |
| VIT_04s0044g01470 | Cation/hydrogen exchanger (CHX15)              | AT2G13620 |
| VIT_04s0044g01480 | 3'(2'),5'-bisphosphate nucleotidase            | AT5G63980 |

|                   |                                                                       |           |
|-------------------|-----------------------------------------------------------------------|-----------|
| VIT_04s0044g01490 | 2-oxoisovalerate dehydrogenase alpha subunit, mitochondrial precursor | AT5G09300 |
| VIT_04s0044g01500 | NAC domain containing protein 104                                     | AT5G64530 |
| VIT_04s0044g01510 | Histone deacetylase HDA14                                             | AT4G33470 |
| VIT_04s0044g01520 | GA 20-oxidase 2                                                       | AT5G07200 |
| VIT_04s0044g01530 | UDP-glucuronic acid: anthocyanin glucuronosyltransferase              | AT5G65550 |
| VIT_04s0044g01540 | UDP-glucuronic acid: anthocyanin glucuronosyltransferase              | AT5G65550 |
| VIT_04s0044g01550 | Pentatricopeptide repeat                                              | AT1G52640 |
| VIT_04s0044g01560 | Protein kinase                                                        | AT1G77280 |
| VIT_04s0044g01570 | DNA topoisomerase III alpha                                           | AT5G63920 |
| VIT_06s0080g00210 | Histone deacetylase protein (HDA8)                                    | AT1G08460 |
| VIT_06s0080g00220 | No hit                                                                | -         |
| VIT_06s0080g00230 | Unknown protein                                                       | AT2G27590 |
| VIT_06s0080g00240 | DTDP-glucose 4-6-dehydratase                                          | AT1G08200 |
| VIT_06s0080g00250 | Sialyltransferase                                                     | AT1G08280 |
| VIT_06s0080g00260 | Seed maturation protein PM38                                          | AT5G22470 |
| VIT_06s0080g00270 | Zinc finger (C2H2 type) protein (WIP3)                                | AT1G08290 |
| VIT_06s0080g00280 | Bile acid sodium symporter                                            | AT3G56160 |
| VIT_06s0080g00290 | TFL1 (Terminal flower 1)                                              | AT2G27550 |
| VIT_06s0080g00300 | Pentatricopeptide (PPR) repeat-containing                             | AT5G48910 |
| VIT_06s0080g00310 | Esterase/lipase/thioesterase family protein                           | AT5G22460 |
| VIT_06s0080g00320 | Esterase/lipase/thioesterase                                          | AT5G22460 |
| VIT_06s0080g00330 | Esterase/lipase/thioesterase family protein                           | AT1G08310 |
| VIT_06s0080g00340 | ABI5 (ABA insensitive 5)                                              | AT3G44460 |
| VIT_06s0080g00350 | Myo-inositol-1-phosphate synthase                                     | AT5G22450 |
| VIT_06s0080g00360 | BZIP transcription factor                                             | AT1G08320 |
| VIT_06s0080g00370 | F-box domain containing protein                                       | AT1G67190 |
| VIT_06s0080g00390 | Endomembrane protein 70 protein                                       | AT1G08350 |
| VIT_06s0080g00400 | Ribosomal protein L10A (RPL10aA) 60S                                  | AT1G08360 |
| VIT_06s0080g00410 | ferredoxin                                                            | AT2G27510 |
| VIT_06s0080g00420 | Glucan endo-1,3-beta-glucosidase 7 precursor                          | AT2G27500 |
| VIT_06s0080g00430 | No hit                                                                | -         |
| VIT_06s0080g00440 | Ribosomal protein S9                                                  | AT3G49080 |
| VIT_06s0080g00450 | Calcium-binding protein CML                                           | AT2G27480 |
| VIT_06s0080g00460 | Nuclear transcription factor Ysubunit B related                       | AT2G27470 |
| VIT_06s0080g00470 | RNA-binding region RNP-1                                              | AT3G52660 |
| VIT_06s0080g00500 | Unknown                                                               | -         |
| VIT_06s0080g00510 | Sec23/sec24 transport family                                          | AT2G27460 |
| VIT_06s0080g00530 | Aspartyl-tRNA synthetase                                              | AT5G56680 |
| VIT_06s0080g00540 | Unknown protein                                                       | -         |
| VIT_06s0080g00550 | EIF-4A3                                                               | AT3G19760 |

|                   |                                                               |           |
|-------------------|---------------------------------------------------------------|-----------|
| VIT_06s0080g00560 | Beta-alanine synthase                                         | AT2G27450 |
| VIT_06s0080g00570 | Unknown protein                                               | AT5G22390 |
| VIT_06s0080g00580 | Rac GTPase activating protein 1                               | AT5G22400 |
| VIT_06s0080g00590 | Harpin-induced protein                                        | AT3G44380 |
| VIT_06s0080g00600 | No hit                                                        | -         |
| VIT_06s0080g00610 | No hit                                                        | -         |
| VIT_06s0080g00630 | No hit                                                        | -         |
| VIT_06s0080g00640 | No hit                                                        | -         |
| VIT_07s0005g03470 | Structural maintenance of chromosomes (SMC1)                  | AT3G54670 |
| VIT_07s0005g03490 | VHS domain-containing protein                                 | AT1G06210 |
| VIT_07s0005g03500 | Serine-type peptidase                                         | AT1G06200 |
| VIT_07s0005g03510 | SAP protein BP-73 E1-E2_ATPase                                | AT1G06190 |
| VIT_07s0005g03520 | Armadillo/beta-catenin repeat family protein                  | AT3G54790 |
| VIT_07s0005g03530 | Ribulose biphosphate carboxylase, large chain                 | AT2G31160 |
| VIT_07s0005g03540 | Plastid-specific 50S ribosomal protein 6                      | AT5G17870 |
| VIT_07s0005g03570 | Arabinose-5-phosphate isomerase                               | AT3G54690 |
| VIT_07s0005g03580 | Transcription factor jumonji (jmj) / zinc finger (C5HC2 type) | AT1G08620 |
| VIT_07s0005g03590 | NADH dehydrogenase subunit 7                                  | -         |
| VIT_07s0005g03600 | Transcription factor jumonji (jmj) / zinc finger (C5HC2 type) | AT1G08620 |
| VIT_07s0005g03610 | NAC domain-containing protein 74                              | AT4G28530 |
| VIT_07s0005g03620 | Serine/threonine kinase 19 isoform 1 STK19                    | AT2G20495 |
| VIT_07s0005g03630 | Ankyrin                                                       | AT1G04430 |
| VIT_07s0005g03640 | Asparagine N-glycosyltransferase                              | AT4G21150 |
| VIT_07s0005g03660 | Non-intrinsic ABC protein 4                                   | AT1G03900 |
| VIT_07s0005g03670 | CHR8 (chromatin remodeling 8)                                 | AT2G18760 |
| VIT_07s0005g03680 | CCR4-NOT complex subunit CAF16                                | AT1G03905 |
| VIT_07s0005g03690 | Protein kinase MK6                                            | AT4G14350 |
| VIT_07s0005g03700 | Scarecrow transcription factor 23 (SCL23)                     | AT3G54220 |
| VIT_07s0005g03710 | Casein Kinase I-like 10                                       | AT3G23340 |
| VIT_07s0005g03720 | VPS2.3 SNF7                                                   | AT1G03950 |
| VIT_07s0005g03730 | Protein phosphatase 2 (formerly 2A), regulatory subunit B"    | AT5G44090 |
| VIT_07s0005g03740 | RabGAP/TBC domain-containing protein                          | AT2G20440 |
| VIT_07s0005g03750 | RIC7 (ROP-interactive crib motif-containing protein 7)        | AT4G28560 |
| VIT_07s0005g03760 | Phytochelatin synthase 1 (PCS1)                               | AT5G44070 |
| VIT_07s0005g03770 | Expansin-A7                                                   | -         |
| VIT_07s0005g03780 | Alcohol oxidase                                               | AT4G28570 |
| VIT_07s0005g03790 | Succinyl-CoA ligase beta-chain                                | AT2G20420 |
| VIT_07s0005g03800 | Unknown protein                                               | AT4G28590 |
| VIT_07s0005g03810 | Unknown protein                                               | AT5G44060 |
| VIT_07s0005g03820 | Acyl-[acyl-carrier-protein] desaturase                        | -         |

|                   |                                                        |           |
|-------------------|--------------------------------------------------------|-----------|
| VIT_07s0005g03830 | Calmodulin-binding protein                             | AT4G28600 |
| VIT_07s0005g03840 | Transcription termination factor mitochondrial mTERF   | AT5G07900 |
| VIT_07s0005g03850 | No hit                                                 | -         |
| VIT_07s0005g03860 | Transcription termination factor mitochondrial mTERF   | AT5G07900 |
| VIT_07s0005g03870 | Transcription termination factor mitochondrial mTERF   | -         |
| VIT_07s0005g03880 | Transcription termination factor mitochondrial mTERF   | -         |
| VIT_07s0005g03890 | Transcription termination factor mitochondrial mTERF   | -         |
| VIT_07s0005g03900 | Rho GDP-dissociation inhibitor 1                       | AT3G07880 |
| VIT_07s0005g03910 | Phosphatidylcholine-sterol O-acyltransferase           | AT1G04010 |
| VIT_07s0005g03930 | Developmental protein DAG, plastid                     | AT2G33430 |
| VIT_07s0005g03940 | ATBARD1/BARD1 (breast cancer associated ring 1)        |           |
| VIT_07s0005g03950 | Ankyrin                                                | AT3G54070 |
| VIT_07s0005g03960 | Peptide transporter protein 3                          | AT5G46050 |
| VIT_07s0005g03970 | Peptide transporter protein 3                          | AT5G46050 |
| VIT_07s0005g03980 | RNA-binding protein Musashi                            | AT4G14300 |
| VIT_07s0005g03990 | Unknown protein                                        | AT1G04030 |
| VIT_07s0005g04000 | No hit                                                 | -         |
| VIT_07s0005g04020 | Leucine Rich Repeat receptor-like kinase               | AT4G08850 |
| VIT_07s0005g04040 | Leucine Rich Repeat receptor-like kinase               | AT4G08850 |
| VIT_07s0005g04050 | Leucine Rich Repeat receptor-like kinase               | AT4G08850 |
| VIT_07s0005g04060 | Leucine Rich Repeat receptor-like kinase               | AT4G08850 |
| VIT_07s0005g04070 | Leucine Rich Repeat receptor-like kinase               | AT4G08850 |
| VIT_07s0005g04080 | Leucine Rich Repeat receptor-like kinase               | AT4G08850 |
| VIT_07s0005g04100 | Leucine Rich Repeat receptor-like kinase               | AT4G08850 |
| VIT_07s0005g04110 | Cellulose synthase CESA4                               | AT5G44030 |
| VIT_07s0005g04120 | PHR1 (phosphate starvation response 1)                 | AT4G28610 |
| VIT_07s0005g04130 | Acid phosphatase class B                               | AT5G44020 |
| VIT_07s0005g04150 | Ribosomal protein L23 (RPL23C) 60S                     | AT3G04400 |
| VIT_07s0005g04180 | Glutathione S-transferase                              | AT5G44000 |
| VIT_07s0005g04190 | Histone-lysine N-methyltransferase SUVR4               | AT3G04380 |
| VIT_07s0005g04200 | No hit                                                 | -         |
| VIT_07s0005g04210 | No hit                                                 | -         |
| VIT_07s0005g04220 | Receptor-like protein kinase                           | AT1G04520 |
| VIT_07s0005g04230 | No hit                                                 | -         |
| VIT_07s0005g04240 | Import receptor subunit TOM22 homolog 2, Mitochondrial | AT5G43970 |
| VIT_07s0005g06180 | RPM1 (resistance to p. syringae pv maculicola 1)       | AT3G07040 |
| VIT_07s0005g06190 | NADH dehydrogenase (ubiquinone) flavoprotein 2         | AT4G02580 |
| VIT_07s0005g06200 | RPM1 (resistance to p. syringae pv maculicola 1)       | AT3G07040 |
| VIT_07s0005g06210 | RPM1 (resistance to p. syringae pv maculicola 1)       | AT3G07040 |
| VIT_07s0005g06220 | RPM1 (resistance to p. syringae pv maculicola 1)       | AT3G07040 |



|                   |                                                                    |           |
|-------------------|--------------------------------------------------------------------|-----------|
| VIT_07s0005g06240 | R protein MLA10                                                    | AT3G07040 |
| VIT_07s0005g06250 | R protein MLA10                                                    | AT3G07040 |
| VIT_07s0005g06260 | No hit                                                             | -         |
| VIT_07s0005g06280 | No hit                                                             | -         |
| VIT_07s0005g06290 | Cytochrome b5 isoform Cb5-C                                        | AT2G32720 |
| VIT_07s0005g06300 | Phototropic-responsive NPH3                                        | AT5G48800 |
| VIT_07s0005g06310 | BSD domain-containing protein                                      | AT3G24820 |
| VIT_07s0005g06340 | Cyclin dependent kinase inhibitor KIP-related protein 3            | AT5G48820 |
| VIT_07s0005g06350 | Photosystem II 47 kDa protein                                      | ATCG00680 |
| VIT_07s0005g06360 | E3 ubiquitin-protein ligase PRT1                                   | AT3G24800 |
| VIT_07s0005g06370 | No hit                                                             | -         |
| VIT_07s0005g06380 | LUG (LEUNIG)                                                       | AT2G32700 |
| VIT_07s0005g06390 | No hit                                                             | -         |
| VIT_07s0005g06400 | No hit                                                             | -         |
| VIT_07s0005g06410 | High-affinity K <sup>+</sup> transporter 1 (HKT1)                  | -         |
| VIT_07s0005g06420 | Thioredoxin family                                                 | AT3G07090 |
| VIT_07s0005g06430 | Unknown                                                            | -         |
| VIT_07s0005g06440 | Drug/metabolite transporter DMT family transporter                 | AT3G07080 |
| VIT_12s0028g00550 | No hit                                                             | -         |
| VIT_12s0028g00560 | Unknown                                                            | -         |
| VIT_12s0028g00570 | Vacuolar protein sorting 16 VCL1 (vacuoleless 1)                   | AT2G38020 |
| VIT_12s0028g00590 | 3-hydroxyisobutyryl-CoA hydrolase                                  | AT1G06550 |
| VIT_12s0028g00610 | Aspartyl protease                                                  | AT3G59080 |
| VIT_12s0028g00630 | Hydroxyacylglutathione hydrolase 3                                 | AT1G53580 |
| VIT_12s0028g00640 | NOL1/NOP2/sun                                                      | AT1G06560 |
| VIT_12s0028g00670 | Zinc knuckle                                                       | -         |
| VIT_12s0028g00680 | No hit                                                             | -         |
| VIT_12s0028g00690 | Auxin responsive SAUR protein                                      | -         |
| VIT_12s0028g00710 | 4-hydroxyphenylpyruvate dioxygenase                                | AT1G06570 |
| VIT_12s0028g00720 | Unknown protein                                                    | AT1G06590 |
| VIT_12s0028g00740 | Unknown protein                                                    | AT1G06590 |
| VIT_12s0028g00810 | Unknown protein                                                    | AT1G06590 |
| VIT_12s0028g00830 | Pleckstrin (PH) domain-containing protein                          | AT2G30880 |
| VIT_12s0028g00860 | NAC domain-containing protein 42                                   | AT2G43000 |
| VIT_12s0028g00900 | No hit                                                             | -         |
| VIT_12s0028g00910 | No hit                                                             | -         |
| VIT_12s0028g00920 | Glutathione S-transferase 9 GSTF9                                  | AT2G30860 |
| VIT_12s0028g00930 | Glutathione S-transferase 9 GSTF9                                  | AT2G30860 |
| VIT_12s0028g00940 | Electron transfer flavoprotein alpha-subunit precursor (Alpha-ETF) | AT1G06660 |
| VIT_12s0028g00960 | Phytoene synthase, chloroplast precursor                           | AT5G17230 |

|                   |                                                              |           |
|-------------------|--------------------------------------------------------------|-----------|
| VIT_12s0028g00980 | Myb family                                                   | AT2G40260 |
| VIT_12s0028g01000 | Unknown protein                                              | AT4G19645 |
| VIT_12s0028g01010 | Unknown                                                      | -         |
| VIT_12s0028g01020 | No hit                                                       | -         |
| VIT_12s0028g01030 | Unknown                                                      | -         |
| VIT_12s0028g01040 | Protein kinase                                               | AT3G57750 |
| VIT_12s0028g01050 | Helicase in vascular tissue and TAPETUM                      | AT2G30800 |
| VIT_12s0028g01060 | No hit                                                       | -         |
| VIT_12s0028g01070 | WD-repeat protein 26                                         | AT5G08560 |
| VIT_12s0028g01080 | Photosystem II oxygen-evolving complex precursor, 23kda PSBP | AT1G06680 |
| VIT_12s0028g01090 | Reticulon family protein (RTNLB5)                            | AT3G10260 |
| VIT_12s0028g01100 | Aldo/keto reductase                                          | AT1G06690 |
| VIT_12s0028g01110 | Phytochrome- interacting factor 5 PIL6                       | AT2G43010 |
| VIT_12s0028g01120 | Amine oxidase                                                | AT2G43020 |
| VIT_12s0028g01130 | No hit                                                       | -         |
| VIT_12s0028g01140 | Pentatricopeptide (PPR) repeat-containing protein            | AT3G59040 |
| VIT_12s0055g00750 | Pentatricopeptide (PPR) repeat-containing protein            | AT3G62470 |
| VIT_12s0055g00760 | No hit                                                       | -         |
| VIT_12s0055g00770 | SWAP (Suppressor-of-White-APricot)                           | AT4G31200 |
| VIT_12s0055g00780 | VPS20.2 SNF7                                                 | AT5G09260 |
| VIT_12s0055g00790 | Clathrin assembly protein 3                                  | AT4G02650 |
| VIT_12s0055g00800 | Arachidonic acid-induced DEA1                                | AT1G12090 |
| VIT_12s0055g00810 | Cationic peroxidase                                          | AT4G25980 |
| VIT_12s0055g00820 | Serine carboxypeptidase II                                   | AT5G42240 |
| VIT_12s0055g00830 | Methyltransferase                                            | AT3G26410 |
| VIT_12s0055g00840 | Sucrose-6-phosphate phosphatase                              | AT2G35840 |
| VIT_12s0055g00850 | Nodulin                                                      | AT3G43660 |
| VIT_12s0055g00860 | Nodulin                                                      | AT1G76800 |
| VIT_12s0055g00870 | Nodulin                                                      | AT1G76800 |
| VIT_12s0055g00890 | No hit                                                       | -         |
| VIT_12s0055g00900 | RAE1 RNA export 1 homolog                                    | AT1G80670 |
| VIT_12s0055g00910 | Kelch repeat-containing F-box protein                        | AT1G22040 |
| VIT_12s0055g00920 | Aspartate aminotransferase                                   | AT2G13810 |
| VIT_12s0055g00930 | Heavy-metal-associated domain-containing protein             | AT2G28660 |
| VIT_12s0055g00940 | Sulfate transporter 1.2                                      | AT1G78000 |
| VIT_12s0055g00950 | Receptor-like kinase 902                                     | AT2G26730 |
| VIT_12s0055g00960 | Unknown                                                      | -         |
| VIT_12s0055g00970 | Pentatricopeptide repeat                                     | AT2G15630 |
| VIT_12s0055g00980 | Peroxidase precursor                                         | AT5G39580 |
| VIT_12s0055g00990 | Peroxidase                                                   | AT5G64120 |

|                   |                                                               |           |
|-------------------|---------------------------------------------------------------|-----------|
| VIT_12s0055g01000 | Peroxidase                                                    | AT5G39580 |
| VIT_12s0055g01010 | Peroxidase                                                    | AT5G64120 |
| VIT_12s0055g01020 | Peroxidase                                                    | AT5G39580 |
| VIT_12s0055g01030 | Peroxidase                                                    | AT5G64120 |
| VIT_14s0066g00920 | Polyribonucleotide nucleotidyltransferase                     | AT5G14580 |
| VIT_14s0066g00950 | Isocitrate dehydrogenase, chloroplast precursor               | AT5G14590 |
| VIT_14s0066g00960 | Glutaredoxin                                                  | AT5G40370 |
| VIT_14s0066g00970 | Anthranilate phosphoribosyltransferase, chloroplast precursor | AT5G17990 |
| VIT_14s0066g00980 | Unknown protein                                               | AT5G62960 |
| VIT_14s0066g00990 | TRNA methyltransferase complex GCD14 subunit                  | AT5G14600 |
| VIT_14s0066g01000 | Phosphate/phosphoenolpyruvate translocator                    | AT3G01550 |
| VIT_14s0066g01010 | Myb domain protein 98                                         | AT4G18770 |
| VIT_14s0066g01020 | DEAD box RNA helicase 1                                       | AT3G01540 |
| VIT_14s0066g01030 | Tubulin gamma complex component 2                             | AT5G17410 |
| VIT_14s0066g01040 | Cytosine methyltransferase (DRM2)                             | AT5G14620 |
| VIT_14s0066g01050 | Glycogen synthase kinase 3 beta                               | AT5G14640 |
| VIT_14s0066g01060 | Polygalacturonase GH28                                        | AT5G14650 |
| VIT_14s0066g01070 | Peptide deformylase, chloroplast precursor                    | AT5G14660 |
| VIT_14s0066g01080 | ADP-ribosylation factor A1B                                   | AT5G14670 |
| VIT_14s0066g01090 | Myb domain protein 24                                         | AT5G40350 |
| VIT_14s0066g01100 | Monodehydroascorbate reductase, cytoplasmic isoform 2         | AT3G27820 |
| VIT_14s0066g01110 | Ribosomal protein L12-1, chloroplast (CL12-A) 50S             | AT3G27830 |
| VIT_14s0066g01120 | PWWP domain-containing protein                                | AT5G40340 |
| VIT_14s0066g01130 | Universal stress protein A                                    | AT5G14680 |
| VIT_14s0066g01140 | Unknown protein                                               | -         |
| VIT_14s0066g01150 | Cinnamoyl-CoA reductase                                       | AT5G14700 |
| VIT_14s0066g01160 | Unknown protein                                               | AT5G14710 |
| VIT_14s0066g01170 | MAP4K alpha1                                                  | AT5G14720 |
| VIT_14s0066g01180 | Phospholipid-transporting ATPase                              | AT3G27870 |
| VIT_14s0066g01190 | Unknown protein                                               | AT3G27880 |
| VIT_14s0066g01200 | Protein kinase beta-1 subunit 5'-AMP-activated                | AT3G01510 |
| VIT_14s0066g01210 | Carbonic anhydrase, chloroplast precursor                     | AT3G01500 |
| VIT_14s0066g01220 | ATMYB66/WER/WER1 (WEREWOLF 1)                                 | AT5G14750 |
| VIT_14s0066g01230 | Unknown protein                                               | AT3G27930 |
| VIT_14s0066g01240 | L-aspartate oxidase                                           | AT5G14760 |
| VIT_14s0066g01250 | Alpha-L-fucosidase 2 precursor                                | -         |
| VIT_14s0066g01260 | Lipase GDSL                                                   | AT3G27950 |
| VIT_14s0066g01270 | Alpha-L-fucosidase 2 precursor                                | AT5G14450 |
| VIT_14s0066g01280 | Kinesin light chain                                           | AT3G27960 |
| VIT_14s0066g01290 | Exonuclease                                                   | AT3G27970 |

|                   |                                                               |           |
|-------------------|---------------------------------------------------------------|-----------|
| VIT_14s0066g01300 | Unknown protein                                               | AT2G36330 |
| VIT_14s0066g01310 | CAAX farnesyltransferase beta subunit                         | AT5G40280 |
| VIT_14s0066g01320 | formate dehydrogenase (FDH)                                   | AT5G14780 |
| VIT_14s0066g01330 | No hit                                                        | -         |
| VIT_14s0066g01340 | DNA-binding protein                                           | AT1G23750 |
| VIT_14s0066g01350 | No hit                                                        | -         |
| VIT_14s0066g01360 | No hit                                                        | -         |
| VIT_14s0066g01370 | No hit                                                        | -         |
| VIT_14s0066g01380 | Calcium homeostasis regulator CHoR1                           | AT3G55250 |
| VIT_14s0066g01390 | Metal-dependent phosphohydrolase HD domain-containing protein | AT5G40270 |
| VIT_14s0066g01400 | MLK/Raf-related protein kinase 1                              | AT3G01490 |
| VIT_14s0066g01410 | Peptidylprolyl isomerase                                      | AT3G01480 |
| VIT_14s0066g01420 | Nodulin MtN3 family                                           | AT3G28007 |
| VIT_14s0066g01430 | Unknown protein                                               | AT2G23470 |
| VIT_14s0066g01440 | Homeodomain leucine zipper protein HB-1                       | AT3G01470 |
| VIT_14s0066g01450 | MBD9 (methyl-CPG-binding Domain 9)                            | AT3G01460 |
| VIT_14s0066g01460 | HEAT repeat-containing protein                                | AT5G14790 |
| VIT_14s0066g01470 | Binding                                                       | -         |
| VIT_14s0066g01480 | Cis-zeatin O-beta-D-glucosyltransferase                       | AT5G14860 |
| VIT_14s0066g01490 | UDP-glucuronosyl and UDP-glucosyl transferase                 | AT2G16890 |
| VIT_14s0066g01500 | UDP-glucuronosyl and UDP-glucosyl transferase                 | AT2G16890 |
| VIT_14s0066g01520 | UDP-glucuronosyl and UDP-glucosyl transferase                 | AT5G14860 |
| VIT_14s0066g01530 | No hit                                                        | -         |
| VIT_14s0066g01540 | Serine/threonine kinase SYMRK                                 | AT1G49100 |
| VIT_14s0066g01550 | Aldehyde dehydrogenase 1 precursor                            | AT1G23800 |
| VIT_14s0066g01560 | Cyclic nucleotide-gated ion channel 18                        | AT5G14870 |
| VIT_14s0066g01570 | Unknown protein                                               | AT1G23840 |
| VIT_14s0066g01580 | K <sup>+</sup> uptake permease 6                              | AT5G14880 |
| VIT_14s0066g01590 | NHL repeat-containing protein                                 | AT1G70280 |
| VIT_14s0066g01600 | NHL repeat-containing protein                                 | AT5G14890 |
| VIT_14s0066g01610 | Zinc finger (C3HC4-type ring finger)                          | AT5G40250 |
| VIT_14s0066g01620 | Hypoxia-responsive                                            | AT3G48030 |
| VIT_14s0066g01630 | UVH3 (ultraviolet hypersensitive 3)                           | AT3G28030 |
| VIT_14s0066g01640 | Nodulin MtN21 family                                          | AT5G40230 |
| VIT_14s0066g01650 | Nodulin MtN21 family                                          | AT3G28050 |
| VIT_14s0066g01660 | DegP protease                                                 | AT5G40200 |
| VIT_14s0066g01670 | Alpha-dioxygenase                                             | AT3G01420 |
| VIT_14s0066g01680 | No hit                                                        | -         |
| VIT_14s0066g01690 | Pathogen-inducible alpha-dioxygenase                          | AT3G01420 |
| VIT_14s0066g01700 | Calmodulin binding protein                                    | AT5G40190 |

|                   |                                                          |           |
|-------------------|----------------------------------------------------------|-----------|
| VIT_14s0066g01710 | Leaf senescence protein                                  | AT3G28150 |
| VIT_14s0066g01720 | Bromo-adjacenty (BAH) domain-containing protein          | AT3G48050 |
| VIT_14s0066g01730 | Cellulose synthase CSLC04                                | AT3G28180 |
| VIT_14s0066g01740 | Unknown protein                                          | AT1G22270 |
| VIT_14s0066g01750 | EMB506 ankyrin repeat protein                            | AT5G40160 |
| VIT_14s0066g01780 | Heavy-metal-associated domain-containing protein         | AT5G14910 |
| VIT_14s0066g01790 | GASA like                                                | AT5G14920 |
| VIT_14s0066g01800 | Phosphatidylinositolglycan class N (PIG-N)               | AT3G01380 |
| VIT_14s0066g01810 | SAG101 (senescence-associated gene 101)                  | AT5G14930 |
| VIT_14s0066g01820 | SAG101 (senescence-associated gene 101)                  | AT5G14930 |
| VIT_14s0066g01830 | SAG101 (senescence-associated gene 101)                  | AT5G14930 |
| VIT_14s0066g01840 | SAG101 (senescence-associated gene 101)                  | AT5G14930 |
| VIT_18s0001g14060 | Transposon protein, CACTA, En/Spm sub-class              | AT3G11290 |
| VIT_18s0001g14070 | Unknown                                                  | -         |
| VIT_18s0001g14080 | Diphthine synthase (DPH5)                                | AT4G31790 |
| VIT_18s0001g14090 | Molecular chaperone DnaJ                                 | AT1G75690 |
| VIT_18s0001g14100 | ABA-responsive protein (HVA22) HVA22H                    | AT5G42560 |
| VIT_18s0001g14110 | Transcription factor E2F/dimerisation partner (TDP) E2F2 | AT1G47870 |
| VIT_18s0001g14120 | Translation initiation factor eIF-3 subunit 3            | AT2G45730 |
| VIT_18s0001g14130 | Zinc finger (C2H2 type) family                           | AT1G75710 |
| VIT_18s0001g14140 | No hit                                                   | -         |
| VIT_18s0001g14150 | No hit                                                   | -         |
| VIT_18s0001g14160 | Heat-and acid-stable phosphoprotein                      | -         |
| VIT_18s0001g14170 | Cyclin-dependent protein kinase regulator CYCB2_4        | AT1G76310 |
| VIT_18s0001g14180 | Armadillo/beta-catenin repeat family protein             | AT5G42340 |
| VIT_18s0001g14190 | Unknown                                                  | -         |
| VIT_18s0001g14200 | No hit                                                   | -         |
| VIT_18s0001g14210 | Unknown protein                                          | AT1G75720 |
| VIT_18s0001g14230 | Hexokinase                                               | AT1G47840 |
| VIT_18s0001g14240 | Adaptor-related protein complex 2, sigma 1 sub           | AT1G47830 |
| VIT_18s0001g14250 | Unknown protein                                          | -         |
| VIT_18s0001g14260 | No hit                                                   | -         |
| VIT_18s0001g14270 | Gibberellin-regulated protein 1 (GASA1)                  | AT1G75750 |
| VIT_18s0001g14280 | ER lumen protein retaining receptor                      | AT1G75760 |
| VIT_18s0001g14290 | Invertase-like protein                                   | AT4G34860 |
| VIT_18s0001g14300 | Cytomatrix protein                                       | AT1G19980 |
| VIT_18s0001g14310 | Flavonone- 3-hydroxylase                                 | AT3G51240 |
| VIT_18s0001g14320 | Unknown protein                                          | AT1G19990 |
| VIT_18s0001g14330 | No hit                                                   | -         |
| VIT_18s0001g14340 | No hit                                                   | -         |

|                   |                                                            |           |
|-------------------|------------------------------------------------------------|-----------|
| VIT_18s0001g14350 | No hit                                                     | -         |
| VIT_18s0001g14360 | Tubulin beta-1 chain                                       | AT1G75780 |
| VIT_18s0001g14370 | No hit                                                     | -         |
| VIT_18s0001g14380 | Brain and reproductive organ-expressed protein             | AT5G42470 |
| VIT_18s0001g14390 | Transducin protein                                         | AT3G06880 |
| VIT_18s0001g14400 | Peptidyl-prolyl cis-trans isomerase ROC5 (rotamase CYP 5)  | AT4G34870 |
| VIT_18s0001g14410 | Unknown protein                                            | AT1G30755 |
| VIT_18s0001g14420 | Unknown                                                    | -         |
| VIT_18s0001g14430 | Unknown                                                    | -         |
| VIT_18s0001g14440 | Molecular chaperone DnaJ                                   | AT4G36040 |
| VIT_18s0001g14450 | Ferredoxin: nadp+ Oxidoreductase PETH                      | AT5G66190 |
| VIT_18s0001g14460 | Unknown protein                                            | AT4G24175 |
| VIT_18s0001g14470 | No hit                                                     | -         |
| VIT_18s0001g14480 | Thaumatococcus SCUTL1                                      | AT1G20030 |
| VIT_18s0001g14490 | Thaumatococcus                                             | AT4G24180 |
| VIT_18s0001g14500 | SHD (shepherd)                                             | AT4G24190 |
| VIT_18s0001g14510 | Ribosomal protein L28                                      | AT4G31460 |
| VIT_18s0001g14520 | Unknown protein                                            | AT1G75810 |
| VIT_18s0001g14530 | Ubiquitin-protein ligase CIP8 (COP1-interacting protein 8) | AT5G64920 |
| VIT_18s0001g14540 | DEAD-box ATP-dependent RNA helicase 28                     | AT4G16630 |
| VIT_18s0001g14550 | Unknown protein                                            | AT4G24200 |
| VIT_18s0001g14560 | Unknown                                                    | -         |
| VIT_18s0001g14580 | Kinesin family member 18/19                                | AT1G20060 |
| VIT_18s0001g14590 | ATSYTC/NTMC2T1.3/NTMC2TYPE1.3/SYTC                         | AT5G04220 |
| VIT_18s0001g14600 | Pentatricopeptide (PPR) repeat-containing protein          | -         |
| VIT_18s0001g14610 | Clavata1 receptor kinase (CLV1)                            | AT1G75820 |
| VIT_18s0001g14620 | Ribosomal protein S16                                      | -         |
| VIT_18s0001g14630 | ATSYTB/NTMC2T1.2/NTMC2TYPE1.2/SYTB                         | AT1G20080 |
| VIT_18s0001g14640 | No hit                                                     | -         |
| VIT_18s0001g14650 | DNA-directed RNA polymerase I subunit A12                  | -         |
| VIT_18s0001g14660 | P-glycoprotein 13                                          | AT1G27940 |
| VIT_18s0001g14670 | Rac-like GTP-binding protein RAC1                          | AT1G75840 |
| VIT_18s0001g14680 | Vacuolar protein sorting 35                                | AT1G75850 |
| VIT_18s0001g14690 | Protein kinase                                             | AT1G77280 |
| VIT_18s0001g14700 | Unknown                                                    | -         |
| VIT_18s0001g14710 | Ketol-acid reductoisomerase precursor                      | AT3G58610 |
| VIT_18s0001g14720 | Ankyrin repeat family protein                              | -         |
| VIT_18s0001g14730 | Glutaredoxin                                               | AT5G42150 |
| VIT_18s0001g14740 | Protein binding                                            | -         |
| VIT_18s0001g14750 | Zinc finger (FYVE type) VPS19                              | AT1G20110 |

|                   |                                                  |           |
|-------------------|--------------------------------------------------|-----------|
| VIT_18s0001g14760 | Lipase 3 (EXL3) family II extracellular          | AT1G75900 |
| VIT_18s0001g14770 | Lipase 3 (EXL3) family II extracellular          | AT1G75900 |
| VIT_18s0001g14780 | Lipase 3 (EXL3) family II extracellular          | AT1G75900 |
| VIT_18s0001g14790 | Lipase 3 (EXL3) family II extracellular          | AT1G75900 |
| VIT_18s0001g14800 | Lipase 3 (EXL3) family II extracellular          | AT1G75900 |
| VIT_18s0001g14810 | Lipase 3 (EXL3) family II extracellular          | AT1G75900 |
| VIT_18s0001g14840 | Nickel ion transporter                           | AT2G16800 |
| VIT_18s0001g14850 | Unknown protein                                  | AT1G11320 |
| VIT_18s0001g14860 | SKP1                                             | AT5G42190 |
| VIT_18s0001g14870 | Subtilisin-type protease precursor               | AT1G20160 |
| VIT_18s0001g14880 | Unknown protein                                  | AT4G22000 |
| VIT_18s0001g14890 | ABA-responsive element-binding protein 3 (AREB3) | -         |
| VIT_18s0001g14900 | La domain-containing protein                     | AT4G35890 |
| VIT_18s0001g14910 | Mannitol dehydrogenase                           | AT4G39330 |
| VIT_18s0001g14920 | Unknown protein                                  | AT1G20180 |
| VIT_18s0001g14930 | Unknown protein                                  | AT1G75980 |
| VIT_18s0001g14940 | Pentatricopeptide (PPR) repeat-containing        | AT3G26540 |
| VIT_18s0001g14950 | EMB2170 (embryo defective 2170)                  | AT1G76980 |
| VIT_18s0001g14960 | Pentatricopeptide (PPR) repeat-containing        | AT1G77010 |
| VIT_18s0001g14970 | Pentatricopeptide (PPR) repeat-containing        | AT1G43980 |
| VIT_18s0001g14980 | 3-methyl-2-oxobutanoate dehydrogenase            | AT1G21400 |
| VIT_18s0001g14990 | Dual-specific kinase DSK1                        | AT3G13690 |
| VIT_18s0001g15000 | ACT domain containing protein (ACR4)             | AT1G76990 |
| VIT_18s0001g15010 | F-box and leucine-rich repeat protein 1          | AT1G77000 |
| VIT_18s0001g15020 | DnaJ homolog, subfamily A, member 4              | AT1G77020 |
| VIT_18s0001g15050 | Protein phosphatase 2C                           | AT1G43900 |
| VIT_18s0001g15060 | No hit                                           | -         |
| VIT_18s0001g15070 | No hit                                           | -         |
| VIT_18s0001g15080 | No hit                                           | -         |
| VIT_18s0001g15090 | RAB GTPase RAB18                                 | AT1G43890 |
| VIT_18s0001g15100 | flavin-containing monooxygenase, putative        | AT1G48910 |
| VIT_18s0001g15110 | Flavin-containing monooxygenases                 | AT1G21430 |
| VIT_18s0001g15120 | Unknown protein                                  | AT4G19950 |
| VIT_18s0001g15130 | WD40 repeat protein                              | -         |
| VIT_18s0001g15140 | Unknown                                          | -         |
| VIT_18s0001g15150 | Unknown protein                                  | -         |
| VIT_18s0001g15160 | S-adenosylmethionine sythetase 2                 | AT4G01850 |
| VIT_18s0001g15170 | S-adenosylmethionine sythetase 2                 | AT4G01850 |
| VIT_18s0001g15180 | No hit                                           | -         |
| VIT_18s0001g15190 | flavin-containing monooxygenase, putative        | AT1G48910 |

|                   |                                                           |           |
|-------------------|-----------------------------------------------------------|-----------|
| VIT_18s0001g15200 | SIK1 (serine/threonine kinase 1)                          | -         |
| VIT_18s0001g15220 | Unknown protein                                           | AT1G31130 |
| VIT_18s0001g15230 | Unknown                                                   | -         |
| VIT_18s0001g15240 | Blue (type 1) copper domain                               | AT2G02850 |
| VIT_18s0001g15250 | Unknown                                                   | -         |
| VIT_18s0001g15260 | Myb domain protein 52                                     | AT1G17950 |
| VIT_18s0001g15270 | SCL1 (scarecrow-like 1)                                   | AT1G21450 |
| VIT_18s0001g15280 | RNA exonuclease 1                                         | AT5G25800 |
| VIT_18s0001g15290 | Ribosome maturation protein SDO1                          | AT1G43860 |
| VIT_18s0001g15300 | No hit                                                    | -         |
| VIT_18s0001g15310 | Thioredoxin M-type                                        | AT3G15360 |
| VIT_18s0001g15320 | SEU3B protein                                             | AT1G43850 |
| VIT_18s0001g15330 | SWEET1                                                    | AT1G21460 |
| VIT_18s0001g15340 | Pentatricopeptide (PPR) repeat-containing protein         | -         |
| VIT_18s0001g15350 | Pentatricopeptide (PPR) repeat-containing protein         | AT3G21470 |
| VIT_18s0001g15360 | Thylakoid luminal 29.8 kDa protein                        | AT1G77090 |
| VIT_18s0001g15370 | Exostosin family protein                                  | AT1G21480 |
| VIT_18s0001g15380 | No hit                                                    | -         |
| VIT_18s0001g15390 | Gaiacol peroxidase                                        | AT4G25980 |
| VIT_18s0001g15400 | KOW domain-containing transcription factor family protein | AT4G08350 |
| VIT_18s0001g15410 | Alcohol dehydrogenase 1                                   | AT1G77120 |
| VIT_18s0001g15420 | Auxin efflux carrier protein 6                            | AT1G77110 |
| VIT_18s0001g15430 | Alliin lyase                                              | -         |
| VIT_18s0001g15450 | Alcohol dehydrogenase 3                                   | AT1G77120 |
| VIT_18s0001g15460 | Stearyl acyl carrier protein desaturase                   | AT1G43800 |
| VIT_18s0001g15470 | Leaf senescence related protein-like                      | AT1G48880 |
| VIT_18s0001g15510 | Unknown                                                   | -         |
| VIT_18s0001g15520 | Leaf senescence protein                                   | AT1G48880 |
| VIT_18s0001g15530 | Pentatricopeptide (PPR) repeat-containing                 | AT3G09040 |
| VIT_18s0001g15540 | No hit                                                    | -         |
| VIT_18s0001g15550 | Serine carboxypeptidase II                                | AT5G42240 |
| VIT_18s0001g15560 | Unknown protein                                           | AT1G77122 |
| VIT_18s0001g15570 | Zinc finger (CCCH-type) family protein                    | AT3G18640 |
| VIT_18s0001g15580 | Glycogenin glucosyltransferase (glycogenin)               | AT1G77130 |
| VIT_18s0001g15600 | Vacuolar protein sorting 45                               | AT1G77140 |
| VIT_18s0001g15610 | Unknown                                                   | -         |
| VIT_18s0001g15620 | Receptor kinase TRKe                                      | AT3G47090 |
| VIT_18s0001g15630 | MAP kinase activating protein                             | AT1G77220 |
| VIT_18s0001g15640 | Pathogenesis-related                                      | AT1G78780 |
| VIT_18s0001g15650 | Pathogenesis related protein                              | AT1G78780 |



|                   |                                                                      |           |
|-------------------|----------------------------------------------------------------------|-----------|
| VIT_18s0001g15660 | Pathogen-related                                                     | AT1G78780 |
| VIT_18s0001g15670 | Cytoplasm protein                                                    | AT1G21370 |
| VIT_18s0001g15680 | Cellulase                                                            | AT4G24260 |
| VIT_18s0001g15690 | Endo-1,4-beta-glucanase                                              | -         |
| VIT_18s0001g15700 | GLTP3 (glycolipid transfer protein 3)                                | AT3G21260 |
| VIT_18s0001g15710 | Electron carrier/ oxidoreductase                                     | AT1G21350 |
| VIT_18s0001g15720 | Leucine Rich Repeat receptor-like kinase                             | AT3G24240 |
| VIT_18s0001g15730 | Dof zinc finger protein DOF3.5                                       | AT3G52440 |
| VIT_18s0001g15740 | No hit                                                               | -         |
| VIT_18s0001g15750 | Protein kinase Xa21                                                  | AT3G47110 |
| VIT_18s0001g15760 | Copine BON3 (BONZAI 3)                                               | -         |
| VIT_18s0001g15790 | V-type H <sup>+</sup> -transporting ATPase 16kDa proteolipid subunit | -         |
| VIT_18s0001g15800 | Protein kinase Xa21                                                  | AT3G47570 |
| VIT_18s0166g00020 | RWP-RK domain-containing protein                                     | -         |
| VIT_18s0166g00030 | No hit                                                               | -         |
| VIT_18s0166g00040 | Protein kinase Xa21                                                  | AT3G47570 |
| VIT_18s0166g00050 | EFR (EF-TU receptor)                                                 | AT3G47570 |
| VIT_18s0166g00060 | No hit                                                               | -         |
| VIT_18s0166g00070 | No hit                                                               | -         |

---

| <b>Gene stable ID</b> | <b>Functional annotation</b>                                         | <b>Arabidopsis homolog</b> |
|-----------------------|----------------------------------------------------------------------|----------------------------|
| VIT_02s0012g02590     | Galacturonosyltransferase 1                                          | -                          |
| VIT_02s0012g02600     | Octicosapeptide/Phox/Bem1p (PB1) domain-containing protein           | -                          |
| VIT_02s0012g02610     | SAR1 (suppressor of auxin resistance1) (Nup160)                      | -                          |
| VIT_02s0012g02620     | PFT1 (phytochrome and flowering time 1) MED25                        | -                          |
| VIT_02s0012g02640     | Aspartic-type endopeptidase                                          | -                          |
| VIT_02s0012g02650     | Purple acid phosphatase 2 PAP2                                       | -                          |
| VIT_02s0012g02660     | Proteasome 26S regulatory subunit (RPN9)                             | AT5G45620                  |
| VIT_02s0012g02670     | Unknown protein                                                      | AT1G31940                  |
| VIT_02s0012g02720     | RPM1 (resistance to p. syringae pv maculicola 1)                     | AT3G07040                  |
| VIT_02s0012g02760     | Methionyl-tRNA synthetase                                            | AT4G13780                  |
| VIT_02s0012g02770     | ABC transporter g family pleiotropic drug resistance 12 PDR12        | AT1G15520                  |
| VIT_02s0012g02780     | Cytochrome b5 domain-containing protein                              | AT4G14965                  |
| VIT_02s0012g02790     | Secretory carrier membrane protein (SCAMP4)                          | AT1G32050                  |
| VIT_02s0012g02800     | No hit                                                               | -                          |
| VIT_02s0012g02810     | CYP76C4                                                              | AT2G45550                  |
| VIT_02s0012g02820     | Geraniol 10-hydroxylase                                              | AT2G45550                  |
| VIT_02s0012g02830     | UDP-glucosyl transferase                                             | AT3G02100                  |
| VIT_02s0012g02840     | No hit                                                               | -                          |
| VIT_02s0154g00080     | Multi-copper oxidase (SKU5)                                          | AT4G12420                  |
| VIT_02s0154g00090     | Vacuolar invertase 2, GIN2                                           | AT1G12240                  |
| VIT_02s0154g00100     | Transaldolase totalL2                                                | AT1G12230                  |
| VIT_02s0154g00110     | Trehalose-6-phosphate phosphatase (AtTPPA)                           | AT4G12430                  |
| VIT_02s0154g00120     | Unknown                                                              | AT4G22600                  |
| VIT_02s0154g00130     | Exostosin (Xyloglucan galactosyltransferase KATAMARI 1)              | AT4G22580                  |
| VIT_02s0154g00140     | 3-oxoacyl-[acyl-carrier-protein] synthase 3 A, chloroplast precursor | AT1G62640                  |
| VIT_02s0154g00150     | PLATZ transcription factor                                           | AT3G60670                  |
| VIT_02s0154g00160     | flavin-containing monooxygenase family protein / FMO family protein  | AT1G62600                  |
| VIT_02s0154g00170     | flavin-containing monooxygenase 3                                    | -                          |
| VIT_02s0154g00180     | flavin-containing monooxygenase 3                                    | AT1G62600                  |
| VIT_02s0154g00190     | flavin-containing monooxygenase 3                                    | AT1G62620                  |
| VIT_02s0154g00200     | Unknown protein                                                      | AT1G12120                  |
| VIT_02s0154g00210     | WRKY DNA-binding protein 21                                          | AT2G30590                  |
| VIT_02s0154g00220     | Zinc finger (C2H2 type) family                                       | AT1G62520                  |
| VIT_02s0154g00230     | Phosphatidic acid phosphatase / PAP2                                 | AT4G22550                  |
| VIT_02s0154g00300     | Small nuclear ribonucleoprotein Sm D3                                | AT1G12090                  |
| VIT_02s0154g00310     | Protease inhibitor/seed storage/lipid transfer protein (LTP)         | AT1G62500                  |
| VIT_02s0154g00320     | Protease inhibitor/seed storage/lipid transfer protein (LTP)         | AT2G45180                  |

|                   |                                                      |           |
|-------------------|------------------------------------------------------|-----------|
| VIT_02s0154g00330 | Unknown protein                                      | AT5G47570 |
| VIT_02s0154g00340 | No hit                                               | -         |
| VIT_02s0154g00350 | L-lactate dehydrogenase A                            | AT4G17260 |
| VIT_02s0154g00360 | No hit                                               | -         |
| VIT_02s0154g00370 | YbaK/prolyl-tRNA synthetase associated region        | AT4G16510 |
| VIT_02s0154g00380 | Unknown                                              | -         |
| VIT_02s0154g00390 | Autophagy 8f (APG8f)                                 | AT4G16520 |
| VIT_02s0154g00400 | Scarecrow transcription factor 6 (SCL6)              | AT4G00150 |
| VIT_02s0154g00410 | Unknown protein                                      | AT5G47580 |
| VIT_02s0154g00420 | No hit                                               | -         |
| VIT_02s0154g00430 | Unknown                                              | -         |
| VIT_02s0154g00440 | Unknown protein                                      | AT5G47580 |
| VIT_02s0154g00450 | Zinc knuckle                                         | -         |
| VIT_02s0154g00460 | Unknown protein                                      | AT4G16530 |
| VIT_02s0154g00470 | No hit                                               | -         |
| VIT_02s0154g00480 | Heat shock protein MTSHP                             | AT4G25200 |
| VIT_02s0154g00490 | Heat shock 22 kDa protein mitochondrial              | AT4G25200 |
| VIT_02s0154g00500 | VAP27-1 (VAMP/synaptobrevin-associated protein 27-1) | AT3G60600 |
| VIT_02s0154g00510 | SEC14 cytosolic factor                               | AT5G47510 |
| VIT_02s0154g00520 | Aspartyl protease                                    | AT4G16563 |
| VIT_02s0154g00530 | Histidine triad nucleotide binding protein 3         | AT4G16566 |
| VIT_02s0154g00540 | Protein arginine N-methyltransferase                 | AT4G16570 |
| VIT_02s0154g00550 | DnaJ homolog, subfamily C, member 11                 | AT2G35720 |
| VIT_02s0236g00160 | Serine/threonine Phosphatase 7                       | -         |
| VIT_02s0236g00170 | No hit                                               | -         |
| VIT_02s0241g00070 | Zinc finger (DHHC type)                              | AT3G60800 |
| VIT_02s0241g00080 | Glycine-rich protein-like                            | AT4G22740 |
| VIT_02s0241g00090 | Translation release factor                           | AT1G62850 |
| VIT_02s0241g00100 | Unknown protein                                      | AT2G45360 |
| VIT_02s0241g00110 | Aminomethyltransferase                               | AT4G12130 |
| VIT_02s0241g00120 | Receptor protein kinase                              | AT4G22730 |
| VIT_02s0241g00130 | No hit                                               | -         |
| VIT_02s0241g00140 | Calmodulin (A)                                       | AT1G12310 |
| VIT_02s0241g00150 | No hit                                               | -         |
| VIT_02s0241g00160 | Esterase/lipase/thioesterase family                  | AT4G12230 |
| VIT_02s0241g00170 | Zinc finger (C2H2 type) family                       | AT4G12240 |
| VIT_02s0241g00180 | UDP-D- glucuronate 4-epimerase 5 GAE5                | AT4G12250 |
| VIT_02s0241g00190 | No hit                                               | -         |
| VIT_02s0488g00010 | H (+)-ATPase 4 AHA4                                  | AT5G62670 |
| VIT_02s0488g00020 | Palmitoyl-protein thioesterase 1 precursor           | AT3G60340 |

|                   |                                                                           |           |
|-------------------|---------------------------------------------------------------------------|-----------|
| VIT_02s0488g00030 | No hit                                                                    | -         |
| VIT_02s0488g00040 | Pentatricopeptide repeat-containing protein                               | -         |
| VIT_02s0488g00050 | Dual specificity phosphatase                                              | -         |
| VIT_04s0008g00190 | ATP-dependent protease La (LON) domain-containing                         | AT2G25740 |
| VIT_04s0008g00200 | Tryptophan-tRNA ligase                                                    | AT2G25840 |
| VIT_04s0008g00210 | Histidine-containing phosphotransferase                                   | AT3G16360 |
| VIT_04s0008g00220 | IAA6                                                                      | AT3G16500 |
| VIT_04s0008g00230 | Amino acid permease 8                                                     | AT1G10010 |
| VIT_04s0008g00240 | Amino acid permease 6                                                     | AT5G49630 |
| VIT_04s0008g00250 | Amino acid permease 6                                                     | AT5G49630 |
| VIT_04s0008g00260 | Amino acid permease 6                                                     | AT5G49630 |
| VIT_04s0008g00270 | Elongation factor 1-alpha (EF-1-alpha)                                    | AT5G60390 |
| VIT_04s0008g00280 | Amino acid permease 1                                                     | AT1G58360 |
| VIT_04s0008g00290 | Clavata1 receptor kinase (CLV1)                                           | AT5G25930 |
| VIT_04s0008g00300 | Clavata1 receptor kinase (CLV1)                                           | AT5G25930 |
| VIT_04s0008g00310 | Clavata1 receptor kinase (CLV1)                                           | AT5G25930 |
| VIT_04s0008g00320 | Leucine-rich repeat family protein                                        | -         |
| VIT_04s0008g00330 | Clavata1 receptor kinase (CLV1)                                           | AT5G25930 |
| VIT_04s0008g00340 | Clavata1 receptor kinase (CLV1)                                           | AT5G25930 |
| VIT_04s0008g00350 | Clavata1 receptor kinase (CLV1)                                           | AT5G25930 |
| VIT_04s0008g00370 | Clavata1 receptor kinase (CLV1)                                           | AT5G25930 |
| VIT_04s0008g00380 | No hit                                                                    | -         |
| VIT_04s0008g00390 | Clavata1 receptor kinase (CLV1)                                           | AT5G25930 |
| VIT_04s0008g00400 | Clavata1 receptor kinase (CLV1)                                           | AT5G25930 |
| VIT_04s0008g00410 | Clavata1 receptor kinase (CLV1)                                           | AT5G25930 |
| VIT_04s0008g00420 | Clavata1 receptor kinase (CLV1)                                           | AT5G25930 |
| VIT_04s0008g00430 | Clavata1 receptor kinase (CLV1)                                           | AT5G25930 |
| VIT_04s0008g00440 | Clavata1 receptor kinase (CLV1)                                           | AT5G25930 |
| VIT_04s0008g00450 | Haloacid dehalogenase hydrolase                                           | AT2G25870 |
| VIT_04s0008g00740 | Protein phosphatase 2C                                                    | AT5G26010 |
| VIT_04s0008g00750 | Unknown protein                                                           | AT4G32960 |
| VIT_04s0008g00760 | Thioredoxin Trp26                                                         | AT2G25950 |
| VIT_04s0008g00770 | Glycine hydroxymethyltransferase                                          | AT4G32520 |
| VIT_04s0008g00780 | Unknown                                                                   | -         |
| VIT_04s0008g00790 | Ribosomal protein L28 (RPL28C) 60S                                        | AT2G19730 |
| VIT_04s0008g00800 | Ferrochelatase-2                                                          | AT5G26030 |
| VIT_04s0008g00810 | ATP synthase g subunit mitochondrial                                      | AT4G29480 |
| VIT_04s0008g00820 | KH domain-containing protein                                              | AT2G25970 |
| VIT_04s0008g00830 | NADH dehydrogenase (ubiquinone) Fe-S protein 7                            | AT5G11770 |
| VIT_04s0008g00840 | Ser/Thr specific protein phosphatase 2A B regulatory subunit beta isoform | AT1G17720 |

|                   |                                                |           |
|-------------------|------------------------------------------------|-----------|
| VIT_04s0008g00900 | MYB divaricata                                 | AT5G56840 |
| VIT_04s0008g00910 | Histone deacetylase protein (HDA2)             | AT5G26040 |
| VIT_04s0008g00920 | Clavata1 receptor kinase (CLV1)                | AT5G25930 |
| VIT_04s0008g00930 | Alpha-expansin 6 precursor                     | -         |
| VIT_04s0008g00950 | Calcineurin B protein 10                       | AT4G33000 |
| VIT_04s0008g00960 | Calcineurin B protein 10                       | AT4G33000 |
| VIT_04s0008g00970 | Translation initiation factor eIF-4A           | -         |
| VIT_04s0008g00980 | Translation initiation factor eIF-4A           | -         |
| VIT_04s0008g00990 | Translation initiation factor eIF-4A           | AT3G13920 |
| VIT_04s0008g01000 | EIF-4A3                                        | AT3G13920 |
| VIT_04s0008g01010 | No hit                                         | -         |
| VIT_04s0008g01020 | Unknown protein                                | AT5G11970 |
| VIT_04s0008g01030 | Unknown protein                                | AT5G11960 |
| VIT_04s0008g01040 | Lysine decarboxylase                           | AT5G11950 |
| VIT_04s0008g01050 | Unknown                                        | -         |
| VIT_04s0008g01060 | Substrate carrier, Mitochondrial               | AT1G14560 |
| VIT_04s0008g01070 | Calmodulin-binding region IQD6                 | AT2G26190 |
| VIT_04s0008g01080 | Calmodulin-binding region IQD6                 | AT2G26180 |
| VIT_04s0008g01090 | CYP706A12                                      | AT2G26170 |
| VIT_04s0008g01100 | CYP706A12                                      | AT2G26170 |
| VIT_04s0008g01110 | Heat shock transcription factor A6B            | AT2G26150 |
| VIT_04s0008g01120 | Glutaredoxin                                   | AT4G33040 |
| VIT_04s0008g01130 | Solute carrier family 25                       | AT5G56450 |
| VIT_04s0008g01350 | Conserved oligomeric Golgi complex component 8 | AT5G11980 |
| VIT_04s0008g01360 | Tassel serine threonine kinase 1               | AT5G12000 |
| VIT_04s0008g01370 | Peptidyl-prolyl cis-trans isomerase SDCCAG10   | AT4G33060 |
| VIT_04s0008g01380 | Unknown protein                                | AT5G12010 |
| VIT_04s0008g01390 | RNA recognition motif (RRM)-containing protein | AT1G21312 |
| VIT_04s0008g01400 | Protein kinase MK6                             | AT4G33080 |
| VIT_04s0008g01410 | Ran-binding protein 1 RanBP1                   | AT5G58590 |
| VIT_04s0008g01420 | HAB2 (Homology to ABI2)                        | AT1G17550 |
| VIT_04s0008g01430 | APM1 (Aminopeptidase M1)                       | AT4G33090 |
| VIT_04s0008g01440 | UPF0203 protein                                | AT4G33100 |
| VIT_04s0008g01450 | Cyclopropane-fatty-acyl-phospholipid synthase  | AT4G33110 |
| VIT_04s0008g01460 | Unknown protein                                | AT5G26160 |
| VIT_04s0008g01470 | WRKY DNA-binding protein 50                    | AT5G26170 |
| VIT_04s0008g01480 | NOL1/NOP2/sun family protein                   | AT5G26180 |
| VIT_04s0008g01630 | No hit                                         | -         |
| VIT_04s0008g01640 | Ankyrin repeat                                 | -         |
| VIT_04s0008g01650 | Ankyrin repeat                                 | AT5G51160 |

|                   |                                        |           |
|-------------------|----------------------------------------|-----------|
| VIT_04s0008g01660 | Carrier protein, Mitochondrial         | AT1G72820 |
| VIT_04s0008g01670 | PHD finger protein alfin               | AT5G26210 |
| VIT_04s0008g01680 | EMB2745                                | AT5G39710 |
| VIT_04s0008g01690 | Carbon-nitrogen hydrolase              | AT5G12040 |
| VIT_04s0008g01700 | Unknown protein                        | AT1G54200 |
| VIT_04s0008g01710 | MAP3K delta-1 protein kinase           | AT4G38470 |
| VIT_04s0008g01720 | Mechanosensitive ion channel           | AT5G12080 |
| VIT_04s0008g01730 | PSBX (photosystem II subunit X)        | -         |
| VIT_04s0008g01740 | Spermine synthase ACAULIS5             | AT5G19530 |
| VIT_04s0008g01750 | Ribosomal protein S3 (RPS3C) 40S       | AT5G35530 |
| VIT_04s0008g01800 | Myb domain protein 7                   | AT4G38620 |
| VIT_04s0008g01810 | Myb domain protein 4                   | AT4G38620 |
| VIT_04s0008g01820 | TT2 (transparent testa 2)              | AT5G35550 |
| VIT_04s0008g01830 | Myb domain protein 32                  | AT4G34990 |
| VIT_04s0008g01840 | TT2 (transparent testa 2)              | AT5G35550 |
| VIT_04s0008g01850 | Trihelix DNA-binding protein (GT2)     | AT1G76880 |
| VIT_04s0008g01860 | CYP72A58                               | AT3G14690 |
| VIT_04s0008g01870 | ATMYB66/WER/WER1 (WEREWOLF 1)          | AT5G14750 |
| VIT_04s0008g01880 | Cytokinin dehydrogenase 7              | AT5G21482 |
| VIT_04s0008g01890 | F-box family protein (FBL15)           | AT4G33210 |
| VIT_04s0008g01900 | Unknown protein                        | AT2G26340 |
| VIT_04s0008g01910 | ferredoxin-related                     | AT1G02180 |
| VIT_04s0008g01920 | F-box/LRR-repeat protein 20            | AT2G06040 |
| VIT_04s0008g01940 | Unknown                                | -         |
| VIT_04s0008g01950 | YGGT                                   | AT5G21920 |
| VIT_04s0008g01960 | Copper-transporting ATPase PAA2        | AT5G21930 |
| VIT_04s0008g01970 | ER (ERECTA)                            | AT2G26330 |
| VIT_04s0008g01980 | MADS-box agamous-like 30               | -         |
| VIT_04s0008g01990 | Myosin-like protein XI-I               | AT4G33200 |
| VIT_04s0008g02000 | Unknown protein                        | AT5G21940 |
| VIT_04s0008g02010 | Endo-1,4-beta-glucanase                | AT3G43860 |
| VIT_04s0008g02020 | Cellulase                              | AT3G43860 |
| VIT_04s0008g02030 | Unknown protein                        | AT2G26310 |
| VIT_04s0008g02040 | Heterotrimeric G protein alpha subunit | AT2G26300 |
| VIT_04s0008g02050 | Hydrolase, alpha/beta fold             | AT4G33180 |
| VIT_04s0008g02070 | Avr9/Cf-9 induced kinase 1             | AT2G05940 |
| VIT_04s0008g02080 | GCR1 (G-protein-coupled receptor 1)    | AT1G48270 |
| VIT_04s0008g02090 | Copper transporter 5                   | AT1G72510 |
| VIT_04s0008g02100 | CID7 damaged DNA binding               | AT2G26280 |
| VIT_04s0008g02110 | No hit                                 | -         |

|                   |                                                     |           |
|-------------------|-----------------------------------------------------|-----------|
| VIT_04s0008g02120 | EMB2758 (embryo defective 2758)                     | AT4G33170 |
| VIT_04s0008g02140 | EMB2261 (embryo defective 2261)                     | AT4G33170 |
| VIT_04s0008g02150 | DCL3 (DICER-like 3)                                 | AT3G43920 |
| VIT_04s0008g02170 | DCL3 (DICER-like 3)                                 | AT3G43920 |
| VIT_04s0008g02180 | BRCT domain-containing protein                      | AT3G43930 |
| VIT_04s0008g02190 | Glutathione synthase S6 modification                | -         |
| VIT_04s0008g02200 | 3-beta-hydroxy-delta5-steroid dehydrogenase         | AT2G26260 |
| VIT_04s0008g02210 | RPD1 (root primordium defective 1)                  | AT5G21970 |
| VIT_04s0008g02220 | Sterile alpha motif (SAM) domain-containing protein | AT2G45700 |
| VIT_04s0008g02230 | AP2 domain-containing transcription factor ORA47    | AT1G19210 |
| VIT_04s0008g02240 | Ubiquitin thiolesterase                             | -         |
| VIT_04s0008g02250 | Beta-ketoacyl-CoA synthase                          | AT2G26250 |
| VIT_04s0008g02260 | Dimethylaniline monooxygenase (N-oxide forming) 2   | AT1G19250 |
| VIT_04s0008g02270 | Hydroxyproline-rich glycoprotein                    | AT5G21280 |
| VIT_04s0008g02280 | Unknown protein                                     | AT3G43540 |
| VIT_04s0008g02290 | ABI3-interacting protein 2                          | AT5G20910 |
| VIT_04s0008g02300 | Pyruvate dehydrogenase E1 beta subunit              | AT5G50850 |
| VIT_04s0008g02310 | ABI3-interacting protein 2, AIP2                    | AT5G20910 |
| VIT_04s0008g02320 | Coatomer subunit beta                               | AT4G31480 |
| VIT_04s0008g02330 | Protein tyrosine phosphatase                        | AT5G10700 |
| VIT_04s0008g02340 | Exocyst subunit EXO70 protein                       | AT4G31540 |
| VIT_04s0008g02650 | Unknown protein                                     | AT5G10620 |
| VIT_04s0008g02660 | Calmodulin-binding protein                          | AT2G43040 |
| VIT_04s0008g02670 | Cryptochrome DASH                                   | AT5G24850 |
| VIT_04s0008g02800 | SAUR_D                                              | AT2G24400 |
| VIT_04s0008g02810 | Chaperone protein dnaJ                              | AT2G24395 |
| VIT_04s0008g02820 | Glycosyltransferase family protein 47               | -         |
| VIT_04s0008g02830 | Galactokinase like protein                          | AT4G16130 |
| VIT_04s0008g02840 | Avirulence induced gene (AIG)                       | AT2G24390 |
| VIT_04s0008g02850 | Proteasome 20S beta subunit A (PBA1) (PRCD)         | AT4G31300 |
| VIT_04s0008g02860 | Cation transport protein chaC                       | AT4G31290 |
| VIT_04s0008g02870 | Transcription factor                                | AT4G31270 |
| VIT_04s0008g02880 | Extracellular ligand-gated ion channel              | AT2G21080 |
| VIT_04s0008g02890 | Receptor kinase                                     | AT4G31250 |
| VIT_04s0008g02900 | Protein disulfide isomerase                         | AT4G31240 |
| VIT_04s0008g02910 | Tassel serine threonine kinase 1                    | AT2G24370 |
| VIT_04s0008g02920 | Desiccation protein PCC13-62 precursor              | AT1G47980 |
| VIT_04s0008g02930 | Oligouridylylate binding protein 1B UBP1B           | AT1G17370 |
| VIT_04s0008g02950 | DNA topoisomerase I                                 | AT4G31210 |
| VIT_04s0008g02960 | CYP706A12                                           | AT5G36110 |

|                   |                                                           |           |
|-------------------|-----------------------------------------------------------|-----------|
| VIT_04s0008g03150 | S-adenosyl-L-methionine-dependent methyltransferase mraW  | AT5G10910 |
| VIT_04s0008g03160 | G protein protein gamma subunit (AGG2)                    | -         |
| VIT_04s0008g03170 | Ubiquitin-specific protease 26 (UBP26)                    | AT3G49600 |
| VIT_04s0008g03180 | Unknown protein                                           | AT4G20325 |
| VIT_04s0008g03190 | F-box family protein (FBX13)                              | AT4G33160 |
| VIT_04s0008g03200 | Lachrymatory factor synthase                              | AT4G32870 |
| VIT_04s0008g03210 | Lachrymatory factor synthase                              | AT4G32870 |
| VIT_04s0008g03220 | Lysophospholipase                                         | AT5G11650 |
| VIT_04s0008g03230 | Unknown protein                                           | AT5G25840 |
| VIT_04s0008g03240 | BAM2 (big apical meristem 2)                              | AT2G25790 |
| VIT_04s0008g03250 | Homeobox gene 8                                           | AT4G32880 |
| VIT_04s0008g03260 | Thioredoxin domain containing 14                          | AT5G11640 |
| VIT_04s0008g03270 | GATA transcription factor 11                              | AT5G25830 |
| VIT_04s0008g03280 | No hit                                                    | -         |
| VIT_04s0008g03290 | Peptidyl-tRNA hydrolase 2                                 | AT4G32900 |
| VIT_04s0008g03300 | SWIM zinc finger family (MAPKKK)                          | AT5G11620 |
| VIT_04s0008g03310 | Pentatricopeptide (PPR) repeat                            | AT1G11290 |
| VIT_04s0008g03320 | UVB-resistance protein                                    | AT5G11580 |
| VIT_04s0008g03330 | Nucleoporin nup85                                         | AT4G32910 |
| VIT_04s0008g03340 | No hit                                                    | -         |
| VIT_04s0008g03350 | Unknown protein                                           | AT2G25800 |
| VIT_04s0008g03360 | F-box and leucine-rich repeat protein 20                  | -         |
| VIT_04s0008g03370 | YebC                                                      | AT2G25830 |
| VIT_04s0008g03380 | Carotenoid cleavage dioxygenase 8                         | AT4G32810 |
| VIT_04s0008g03390 | No hit                                                    | -         |
| VIT_04s0008g03400 | DREB sub A-4 of ERF/AP2 transcription factor              | AT5G11590 |
| VIT_04s0008g03410 | Unknown protein                                           | AT5G11600 |
| VIT_04s0008g03420 | Exostosin family protein                                  | AT5G25820 |
| VIT_04s0008g03430 | Exostosin family                                          | AT5G25820 |
| VIT_04s0008g03440 | Exosome complex exonuclease RRP46                         | AT3G46210 |
| VIT_04s0008g03450 | Lignostilbene-alpha, beta-dioxygenase and related enzymes | AT3G63520 |
| VIT_04s0008g03460 | Histidine kinase 1 AHK3                                   | AT1G27320 |
| VIT_04s0008g03470 | Myb domain protein 109                                    | -         |
| VIT_04s0008g03480 | Beta-carotene 15,15'-monooxygenase                        | AT3G63520 |
| VIT_04s0008g03490 | Ankyrin repeat protein                                    | -         |
| VIT_04s0008g03500 | Ankyrin                                                   | AT1G10340 |
| VIT_04s0008g03510 | Lignostilbene-alpha, beta-dioxygenase and related enzymes | AT3G63520 |
| VIT_04s0008g03520 | Ring-H2 finger protein ATL4J                              | -         |
| VIT_04s0008g03530 | Ankyrin repeat                                            | AT1G10340 |
| VIT_04s0043g00680 | No hit                                                    | -         |



|                   |                                               |           |
|-------------------|-----------------------------------------------|-----------|
| VIT_04s0043g00690 | ARR22 Type A                                  | AT3G04280 |
| VIT_04s0043g00700 | PTAC3 (plastid transcriptionally active3)     | AT3G04260 |
| VIT_04s0043g00710 | Hypoxia up-regulated 1 HSP70                  | AT4G16660 |
| VIT_04s0043g00720 | Transketolase                                 | AT2G34590 |
| VIT_04s0043g00730 | formamidopyrimidine-DNA glycosylase 1         | AT1G52500 |
| VIT_04s0043g00740 | Cytoplasmic FMR1 interacting protein          | AT5G18410 |
| VIT_04s0043g00750 | No hit                                        | -         |
| VIT_08s0032g00450 | No hit                                        | -         |
| VIT_08s0032g01110 | Axial regulator YABBY2                        | AT1G08465 |
| VIT_08s0032g01120 | Pentatricopeptide repeat-containing protein   | -         |
| VIT_08s0032g01130 | Caffeic acid methyltransferase                | AT5G54160 |
| VIT_08s0032g01140 | Unknown protein                               | AT5G16280 |
| VIT_08s0105g00260 | Digalactosyldiacylglycerol synthase 1         | AT3G11670 |
| VIT_08s0105g00270 | NC domain-containing protein                  | AT5G06370 |
| VIT_08s0105g00280 | Ribosomal protein S8e                         | AT5G06360 |
| VIT_08s0105g00290 | Zinc finger (C3HC4-type ring finger)          | AT5G01450 |
| VIT_08s0105g00300 | Phospholipase C                               | AT3G08510 |
| VIT_08s0105g00310 | Rhodanese domain-containing protein           | AT3G08920 |
| VIT_08s0105g00330 | Enhanced silencing phenotype 4 ESP4 symplekin | AT5G01400 |
| VIT_08s0105g00340 | NLI interacting factor (NIF)                  | AT3G55960 |
| VIT_08s0105g00350 | DnaJ homolog, subfamily B, member 4           | AT3G08910 |
| VIT_08s0105g00360 | PHD finger protein alfin                      | AT5G05610 |
| VIT_08s0105g00370 | Myb family                                    | AT2G01060 |
| VIT_08s0105g00380 | Leucoanthocyanidin dioxygenase                | AT3G11180 |
| VIT_08s0105g00390 | Calcium-dependent protein kinase 13 CPK13     | AT3G51850 |
| VIT_08s0105g00400 | GT-1-like transcription factor                | AT2G38250 |
| VIT_08s0105g00410 | Transposase, IS4                              | AT5G41980 |
| VIT_08s0105g00420 | Unknown                                       | -         |
| VIT_10s0092g00490 | CYP71A12                                      | -         |
| VIT_10s0092g00500 | CYP71D10                                      | AT5G25120 |
| VIT_10s0092g00510 | CYP71D10p                                     | AT3G26310 |
| VIT_10s0092g00520 | Leucine-rich repeat family                    | -         |
| VIT_10s0092g00560 | Transducin protein                            | AT2G16405 |
| VIT_10s0092g00570 | Leucine-rich repeat family                    | AT1G56140 |
| VIT_11s0016g01900 | N-MYRISTOYLtransferase                        | AT5G57020 |
| VIT_11s0016g01910 | THO complex subunit 6                         | AT2G19430 |
| VIT_11s0016g01920 | EIF-4A3                                       | AT1G54270 |
| VIT_11s0016g01930 | Diacylglycerol acyltransferase                | AT2G19450 |
| VIT_11s0016g01940 | Unknown protein                               | AT2G19460 |
| VIT_11s0016g01950 | Casein kinase I delta                         | AT1G72710 |

|                   |                                                               |           |
|-------------------|---------------------------------------------------------------|-----------|
| VIT_11s0016g02380 | 1-aminocyclopropane-1-carboxylate oxidase 2 (ACO1)            | AT2G19590 |
| VIT_11s0016g02400 | K <sup>+</sup> efflux antiporter (KEA4)                       | AT2G19600 |
| VIT_11s0016g02410 | MYB divaricata                                                | AT5G56840 |
| VIT_11s0016g02420 | UDP-N-acetylglucosamine O-acyltransferase protein             | AT4G29540 |
| VIT_11s0016g02430 | Dual-specific kinase DSK1                                     | AT3G13690 |
| VIT_12s0055g00970 | Pentatricopeptide repeat                                      | AT2G15630 |
| VIT_12s0055g00980 | Peroxidase precursor                                          | AT5G39580 |
| VIT_12s0055g00990 | Peroxidase                                                    | AT5G64120 |
| VIT_12s0055g01000 | Peroxidase                                                    | AT5G39580 |
| VIT_12s0055g01010 | Peroxidase                                                    | AT5G64120 |
| VIT_12s0055g01020 | Peroxidase                                                    | AT5G39580 |
| VIT_12s0055g01030 | Peroxidase                                                    | AT5G64120 |
| VIT_14s0066g00920 | Polyribonucleotide nucleotidyltransferase                     | AT5G14580 |
| VIT_14s0066g00950 | Isocitrate dehydrogenase, chloroplast precursor               | AT5G14590 |
| VIT_14s0066g00960 | Glutaredoxin                                                  | AT5G40370 |
| VIT_14s0066g00970 | Anthranilate phosphoribosyltransferase, chloroplast precursor | AT5G17990 |
| VIT_14s0066g00980 | Unknown protein                                               | AT5G62960 |
| VIT_14s0066g00990 | TRNA methyltransferase complex GCD14 subunit                  | AT5G14600 |
| VIT_14s0066g01000 | Phosphate/phosphoenolpyruvate translocator                    | AT3G01550 |
| VIT_14s0066g01010 | Myb domain protein 98                                         | AT4G18770 |
| VIT_14s0066g01020 | DEAD box RNA helicase 1                                       | AT3G01540 |
| VIT_13s0019g01410 | OBP3 (OBF-binding protein 3)                                  | AT5G02460 |
| VIT_13s0019g01430 | Heat shock protein 70                                         | AT5G02500 |
| VIT_13s0019g01440 | No hit                                                        | -         |
| VIT_13s0019g01450 | Unknown protein                                               | AT3G04020 |
| VIT_13s0019g01470 | Geranylgeranyltransferase type I beta subunit                 | AT2G39550 |
| VIT_13s0019g01490 | C2 domain-containing protein                                  | AT3G55470 |
| VIT_13s0019g01510 | Unknown protein                                               | AT2G39690 |
| VIT_13s0019g01530 | Adaptor-related protein complex 3, beta 2 subunit             | AT3G55480 |
| VIT_13s0019g01570 | Unknown protein                                               | AT5G54440 |
| VIT_13s0019g01590 | Pentatricopeptide repeat-containing protein                   | -         |
| VIT_13s0019g01600 | No hit                                                        | -         |
| VIT_13s0019g01610 | XH/XS domain-containing protein                               | AT3G48670 |
| VIT_13s0019g01620 | No hit                                                        | -         |
| VIT_13s0019g01640 | Unknown protein                                               | AT1G13790 |
| VIT_13s0019g01650 | Alpha-expansin 6 precursor                                    | AT2G39700 |
| VIT_13s0019g01670 | Telomeric DNA binding protein 1                               | AT5G13820 |
| VIT_13s0019g01700 | Scarecrow transcription factor 14 (SCL14)                     | AT1G07530 |
| VIT_13s0019g01710 | Scarecrow transcription factor 14 (SCL14)                     | AT1G07530 |
| VIT_13s0019g01740 | Scarecrow transcription factor 14 (SCL14)                     | AT1G07530 |

|                   |                                              |           |
|-------------------|----------------------------------------------|-----------|
| VIT_13s0019g01780 | Scarecrow transcription factor 14 (SCL14)    | AT1G07530 |
| VIT_13s0019g01790 | Scarecrow transcription factor 14 (SCL14)    | AT1G07530 |
| VIT_13s0019g01810 | Scarecrow transcription factor 14 (SCL14)    | AT1G07530 |
| VIT_13s0019g01820 | Cell division protein methyltransferase FtsJ | AT5G13830 |
| VIT_13s0019g01840 | Cell division cycle 20-like protein 1        | AT5G13840 |
| VIT_13s0019g01860 | Actin-related protein 5                      | AT3G12380 |
| VIT_13s0019g01870 | No hit                                       | -         |
| VIT_13s0019g01890 | DVL11/RTFL8 (ROTUNDIFOLIA like 8)            | AT2G39705 |
| VIT_13s0019g01900 | FK506-binding protein 4/5                    | AT3G55520 |
| VIT_13s0019g01920 | Laccase                                      | AT5G60020 |
| VIT_13s0019g01930 | Laccase                                      | AT5G60020 |
| VIT_13s0019g01940 | Laccase                                      | AT5G60020 |
| VIT_13s0019g02120 | Zinc finger (C2H2 type) family               | AT2G37740 |
| VIT_13s0019g02130 | Tropinone reductase                          | AT5G06060 |
| VIT_13s0019g02140 | Tropinone reductase                          | AT5G06060 |
| VIT_13s0019g02150 | Laccase                                      | AT5G60020 |
| VIT_13s0019g02160 | Laccase                                      | AT5G60020 |
| VIT_13s0019g02170 | Laccase                                      | AT5G06060 |
| VIT_13s0019g02180 | Tropinone reductase                          | AT5G06060 |
| VIT_13s0019g02190 | No hit                                       | -         |
| VIT_13s0019g02200 | Protein phosphatase 2CA AHG3 PP2CA           | AT3G11410 |
| VIT_13s0019g02210 | Sterol 4-alpha-methyl-oxidase 1 (SMO1)       | AT1G07420 |
| VIT_13s0019g02220 | No hit                                       | -         |
| VIT_13s0019g02230 | PAP/25A associated domain containing protein | AT2G39740 |
| VIT_13s0019g02240 | Ribosomal protein S7 (RPS7B) 40S             | AT3G02560 |
| VIT_13s0019g03090 | Heat shock protein class I (HSP17.8-CI)      | -         |
| VIT_13s0019g03100 | Cis-zeatin O-beta-D-glucosyltransferase      | AT1G22400 |
| VIT_13s0019g03110 | Heat shock protein 17.6 kDa class I          | -         |
| VIT_13s0019g03120 | Glucosyltransferase-2                        | AT1G22400 |
| VIT_13s0019g03130 | Glucosyltransferase-2                        | AT1G22400 |
| VIT_13s0019g03140 | Heat shock protein 17.6 kDa class I          | -         |
| VIT_13s0019g03150 | Membrane protein                             | -         |
| VIT_13s0019g03160 | Heat shock protein 17.6 kDa class I          | -         |
| VIT_13s0019g03170 | Heat shock protein 16.9 kDa class I          | AT3G46230 |
| VIT_13s0019g03180 | Unknown protein                              | AT5G05840 |
| VIT_13s0019g03190 | Zinc finger (C3HC4-type ring finger)         | AT5G05830 |
| VIT_13s0019g03200 | Myb domain protein 109                       | AT3G55730 |
| VIT_13s0019g03210 | Lectin-like protein                          | AT5G01090 |
| VIT_13s0019g03220 | Proline transporter 1 (ProT1)                | AT2G39890 |
| VIT_13s0019g03230 | Unknown protein                              | -         |

|                   |                                                        |           |
|-------------------|--------------------------------------------------------|-----------|
| VIT_13s0019g03240 | Syntaxin 18                                            | AT1G51740 |
| VIT_13s0019g03250 | Auxin-independent growth promoter                      | AT2G37980 |
| VIT_13s0019g03260 | Ribosomal protein L35a (RPL35aC) 60S                   | AT1G07070 |
| VIT_13s0019g03270 | Phosphate translocator protein2, Plastidic             | AT3G11320 |
| VIT_13s0019g03280 | LIM domain containing protein                          | AT3G55770 |
| VIT_13s0019g03290 | Unknown protein                                        | AT2G39910 |
| VIT_13s0019g03300 | Glycosyl hydrolase family 17                           | -         |
| VIT_13s0019g03310 | Transposon protein                                     | AT5G05800 |
| VIT_13s0019g03320 | Acid phosphatase class B                               | AT2G39920 |
| VIT_13s0019g03330 | Adenylosuccinate lyase                                 | AT1G36280 |
| VIT_13s0019g03340 | No hit                                                 | -         |
| VIT_13s0019g03350 | Sedoheptulose-1,7-bisphosphatase (SBPase), Chloroplast | -         |
| VIT_13s0019g03360 | Laccase                                                | -         |
| VIT_13s0019g03370 | Myb family                                             | -         |
| VIT_13s0019g03380 | Coronatine-insensitive protein 1                       | AT2G39940 |
| VIT_13s0019g03390 | Unknown protein                                        | AT2G39950 |
| VIT_13s0019g03400 | Signal peptidase complex subunit 2                     | AT2G39960 |
| VIT_13s0019g03410 | Peroxisomal membrane protein (PMP36)                   | AT2G39970 |
| VIT_13s0019g03420 | C2 domain-containing protein                           | AT1G07310 |
| VIT_13s0019g03430 | Anthocyanin 5-aromatic acyltransferase                 | AT2G39980 |
| VIT_13s0019g03450 | Unknown protein                                        | AT3G55820 |
| VIT_13s0019g03460 | Homeodomain transcription factor 5                     | AT3G11260 |
| VIT_13s0019g03470 | Translation initiation factor eIF-3 subunit 5          | AT2G39990 |
| VIT_13s0019g03480 | HAD superfamily hydrolase                              | AT3G45740 |
| VIT_13s0019g03490 | Zinc finger (CCCH-type) family protein                 | AT2G20280 |
| VIT_13s0019g03510 | Zinc finger (CCCH-type) family protein                 | AT2G20280 |
| VIT_13s0019g03700 | Lateral organ boundaries protein 1                     | AT1G07900 |
| VIT_13s0019g03710 | Lateral organ boundaries protein 1                     | AT1G07900 |
| VIT_13s0019g03720 | Lateral organ boundaries protein 11                    | AT2G28500 |
| VIT_13s0019g03730 | No hit                                                 | -         |
| VIT_13s0019g03750 | Lateral organ boundaries protein 11                    | AT2G28500 |
| VIT_13s0019g03760 | Lateral organ boundaries protein 11                    | AT2G28500 |
| VIT_13s0019g03770 | DNA-directed RNA polymerase subunit beta'              | -         |
| VIT_13s0019g03780 | Lateral organ boundaries protein 11                    | AT2G28500 |
| VIT_13s0019g03800 | Lateral organ boundaries protein 1                     | AT1G07900 |
| VIT_13s0019g03810 | Lateral organ boundaries protein 1                     | AT1G07900 |
| VIT_13s0019g03820 | Lateral organ boundaries protein 11                    | AT2G28500 |
| VIT_13s0019g03830 | Lateral organ boundaries protein 11                    | AT2G28500 |
| VIT_13s0019g03840 | Lateral organ boundaries protein 1                     | AT1G07900 |
| VIT_13s0019g03860 | F-type H <sup>+</sup> -transporting ATPase d chain     | AT3G52300 |

|                   |                                                              |           |
|-------------------|--------------------------------------------------------------|-----------|
| VIT_13s0019g03870 | Substrate carrier, Mitochondrial                             | AT2G35800 |
| VIT_13s0019g03880 | DnaJ homolog, subfamily C, member 19                         | AT2G35795 |
| VIT_13s0019g03890 | Calmodulin binding protein                                   | AT5G03040 |
| VIT_13s0019g04110 | Retrotransposon protein                                      | -         |
| VIT_13s0019g04120 | Rhomboid                                                     | AT3G07950 |
| VIT_13s0019g04130 | AarF domain containing kinase                                | AT2G39190 |
| VIT_13s0019g04140 | LHCA1                                                        | AT3G54890 |
| VIT_13s0019g04150 | Receptor protein kinase CRINKLY4 precursor                   | AT2G39180 |
| VIT_13s0019g04160 | Protein kinase                                               | AT1G16670 |
| VIT_13s0019g04170 | Para-aminobenzoate (PABA) synthase                           | AT2G28880 |
| VIT_13s0019g04180 | Aminodeoxychorismate synthase/glutamine amidotransferase     | AT2G28880 |
| VIT_13s0019g04190 | Chorismate synthase 1, chloroplast precursor                 | AT1G48850 |
| VIT_13s0019g04200 | Patatin                                                      | AT3G54950 |
| VIT_13s0019g04210 | No hit                                                       | -         |
| VIT_13s0019g04220 | Tryptophan/tyrosine permease family                          | AT5G19500 |
| VIT_13s0019g04230 | V-type H <sup>+</sup> -transporting ATPase subunit G         | AT3G01390 |
| VIT_13s0019g04240 | Protein disulfide-isomerase A1                               | AT5G60640 |
| VIT_13s0019g04250 | Unknown protein                                              | AT5G14990 |
| VIT_13s0019g04260 | Monoglyceride lipase                                         | AT5G19290 |
| VIT_13s0019g04270 | No hit                                                       | -         |
| VIT_13s0019g04280 | Aquaporin PIP2B                                              | AT2G37170 |
| VIT_13s0019g04290 | No hit                                                       | -         |
| VIT_13s0019g04300 | Ribosomal protein L12 (RPL12A) 60S                           | AT2G37190 |
| VIT_13s0019g04310 | DCP2 (decapping 2)                                           | AT5G13570 |
| VIT_17s0000g05480 | EMB2454 (embryo defective 2454)                              | AT1G18920 |
| VIT_17s0000g05490 | Lateral organ boundaries domain family protein (LBD27)       | AT3G47870 |
| VIT_17s0000g05500 | Cysteine endopeptidase                                       | AT3G47910 |
| VIT_17s0000g05510 | Pentatricopeptide (PPR) repeat-containing protein            | AT1G74750 |
| VIT_17s0000g05520 | Calcium-dependent protein kinase 30 CPK30                    | AT1G18890 |
| VIT_17s0000g05530 | DnaJ homolog, subfamily B, member 4                          | AT3G47940 |
| VIT_17s0000g05540 | H (+)-ATPase 11 AHA11                                        | AT5G62670 |
| VIT_17s0000g05550 | Proton-dependent oligopeptide transport (POT) family protein | AT5G62680 |
| VIT_17s0000g05560 | Proton-dependent oligopeptide transport (POT) family protein | AT5G28470 |
| VIT_17s0000g05570 | Receptor protein kinase                                      | AT5G62710 |
| VIT_17s0000g05580 | Isopiperitenol dehydrogenase                                 | AT2G47140 |
| VIT_17s0000g05600 | (-)-isopiperitenol dehydrogenase                             | AT2G47140 |
| VIT_17s0000g05610 | Isopiperitenol dehydrogenase                                 | AT2G47140 |
| VIT_17s0000g05620 | Integral membrane HPP family protein                         | AT5G62720 |
| VIT_17s0000g05630 | Homeodomain leucine zipper protein HB-1                      | AT3G01470 |
| VIT_17s0000g05640 | Nitrate transporter 1:2                                      | AT1G69850 |

|                   |                                                        |           |
|-------------------|--------------------------------------------------------|-----------|
| VIT_17s0000g05650 | Unknown protein                                        | AT1G74730 |
| VIT_17s0000g05660 | Polygalacturonase GH28                                 | AT1G23460 |
| VIT_17s0000g05670 | Polygalacturonase GH28                                 | AT3G15720 |
| VIT_17s0000g05680 | Band 7 family                                          | AT5G62740 |
| VIT_17s0000g05690 | Isochorismate synthase 1, chloroplast precursor        | AT3G01280 |
| VIT_17s0000g05700 | Phosphoribosylanthranilate transferase                 | AT1G74720 |
| VIT_17s0000g05810 | WRKY DNA-binding protein 72                            | AT5G15130 |
| VIT_17s0000g05820 | Ubiquitin-conjugating enzyme E2 A                      | AT2G02760 |
| VIT_17s0000g05830 | Unknown protein                                        | AT5G62550 |
| VIT_17s0000g05840 | Calmodulin binding IQD31 (IQ-domain 31)                | AT1G74690 |
| VIT_17s0000g05850 | ATATH1 (ABC2 homolog1)                                 | AT3G47730 |
| VIT_17s0000g05860 | ATATH6 (ABC2 homolog 6)                                | AT3G47780 |
| VIT_17s0000g05870 | Aldose 1-epimerase protein                             | AT3G47800 |
| VIT_17s0000g05880 | Calcineurin phosphoesterase                            | AT3G47810 |
| VIT_17s0000g05890 | Protein kinase APK1B                                   | AT2G02800 |
| VIT_17s0000g05900 | Basic helix-loop-helix (bHLH) family                   | AT1G74500 |
| VIT_17s0000g06090 | Pentatricopeptide (PPR) repeat-containing protein      | AT1G74580 |
| VIT_17s0000g06100 | Pentatricopeptide (PPR) repeat-containing protein      | AT1G74600 |
| VIT_17s0000g06110 | Glutathione S-transferase 9 GSTU9                      | AT5G62480 |
| VIT_17s0000g06120 | Glutathione S-transferase 9 GSTU9                      | AT5G62480 |
| VIT_17s0000g06130 | Glutathione S-transferase 9 GSTU9                      | AT5G62480 |
| VIT_17s0000g06140 | Glutathione S-transferase 9 GSTU9                      | AT5G62480 |
| VIT_17s0000g06150 | Glutathione S-transferase 9 GSTU9                      | AT5G62480 |
| VIT_17s0000g06170 | Pentatricopeptide (PPR) repeat-containing              | AT1G74630 |
| VIT_17s0000g06180 | Hydrolase, alpha/beta fold                             | AT1G74640 |
| VIT_17s0000g06390 | Pentatricopeptide (PPR) repeat-containing protein      | AT1G59720 |
| VIT_17s0000g06400 | NAC domain containing protein 100                      | AT5G61430 |
| VIT_17s0000g06410 | MYB transcription factor MIXTA-like 2                  | AT3G01140 |
| VIT_17s0000g06420 | Galactosyl transferase GMA12/MNN10                     | AT1G18700 |
| VIT_17s0000g06430 | Peptidyl-prolyl cis-trans isomerase NIMA-interacting 4 | AT1G26550 |
| VIT_17s0000g06440 | Galactoside 2-alpha-L-fucosyltransferase               | AT2G03220 |
| VIT_17s0000g06450 | Ribulose-phosphate 3-epimerase, chloroplast precursor  | AT5G61410 |
| VIT_17s0000g06460 | Zinc finger (C3HC4-type ring finger)                   | AT1G74410 |
| VIT_17s0000g06470 | Pentatricopeptide (PPR) repeat-containing protein      | AT5G61400 |
| VIT_17s0000g06480 | Pentatricopeptide (PPR) repeat-containing protein      | -         |
| VIT_17s0000g06490 | MKK5                                                   | -         |
| VIT_17s0000g06500 | Pentatricopeptide (PPR) repeat-containing              | AT5G66520 |
| VIT_17s0000g06510 | Exonuclease                                            | AT5G61390 |
| VIT_17s0000g06520 | Timing of CAB expression 1                             | AT5G61380 |
| VIT_17s0000g06530 | No hit                                                 | -         |

|                   |                                                     |           |
|-------------------|-----------------------------------------------------|-----------|
| VIT_17s0000g06540 | Exonuclease                                         | -         |
| VIT_17s0000g06550 | Exonuclease                                         | -         |
| VIT_17s0000g06560 | Retrovirus Pol polyprotein from transposon TNT 1-94 | AT3G29785 |
| VIT_17s0000g06570 | Timing of CAB expression 1 protein                  | AT5G61380 |
| VIT_17s0000g06580 | Vesicle transport v-SNARE 11                        | AT5G39510 |
| VIT_17s0000g06590 | Galactosyl transferase GMA12/MNN10                  | AT1G74380 |
| VIT_17s0000g06600 | No hit                                              | -         |
| VIT_17s0000g06610 | Zinc finger (C3HC4-type ring finger)                | AT1G18660 |
| VIT_17s0000g06620 | Protein kinase pto                                  | AT5G61350 |
| VIT_17s0000g06630 | Unknown protein                                     | AT5G61340 |
| VIT_17s0000g06640 | formin-2                                            | AT2G25050 |
| VIT_17s0000g06650 | IBS1 (impaired in baba-induced sterility 1)         | AT1G18670 |
| VIT_17s0000g06940 | LAP4 protein                                        | AT5G07910 |

---

**XP-CLR**

| <b>Gene stable ID</b> | <b>Functional annotation</b>                              | <b>Arabidopsis homolog</b> |
|-----------------------|-----------------------------------------------------------|----------------------------|
| VIT_01s0011g00100     | MADS-box APETALA 1                                        | AT1G69120                  |
| VIT_01s0011g00110     | SEPALLATA1                                                | AT5G15800                  |
| VIT_01s0011g00120     | Unknown protein                                           | AT1G69160                  |
| VIT_01s0011g00130     | Squamosa promoter-binding protein 6 (SPL6)                | AT1G69170                  |
| VIT_01s0011g00140     | CRABS CLAW                                                | AT1G69180                  |
| VIT_01s0011g00150     | Unknown protein                                           | AT1G26330                  |
| VIT_01s0011g00160     | Alpha-1,4-glucan-protein synthase                         | AT3G08900                  |
| VIT_01s0011g00170     | Brassinosteroid-6-oxidase [Vitis vinifera]                | AT5G38970                  |
| VIT_01s0011g00190     | Brassinosteroid-6-oxidase [Vitis vinifera]                | AT3G30180                  |
| VIT_01s0011g00210     | Cytochrome b5 isoform Cb5-D                               | AT1G26340                  |
| VIT_01s0011g00230     | Dihydropterin pyrophosphokinase /dihydropteroate synthase | AT4G30000                  |
| VIT_01s0011g00240     | Fructokinase-2                                            | AT1G69200                  |
| VIT_01s0011g00250     | 6-phosphogluconolactonase                                 | AT1G13700                  |
| VIT_01s0011g00280     | feronia receptor-like kinase                              | AT3G51550                  |
| VIT_01s0011g00290     | Unknown protein                                           | AT1G69210                  |
| VIT_01s0011g00300     | SIK1 (serine/threonine kinase 1)                          | AT1G69220                  |
| VIT_01s0011g00340     | Glycosyl hydrolase family 28 protein                      | AT1G78400                  |
| VIT_01s0011g00350     | CYP78A5                                                   | AT1G13710                  |
| VIT_01s0011g00370     | SP1L2 (SPIRAL2)                                           | -                          |
| VIT_01s0011g00380     | SP1L1 (SPIRAL1-like1)                                     | AT3G29770                  |
| VIT_01s0011g00390     | Asparagine synthase                                       | AT2G03667                  |
| VIT_01s0011g00400     | Nuclear transport factor 2 (NTF2)                         | AT5G60980                  |
| VIT_01s0011g00410     | Nuclear transport factor 2 (NTF2)                         | AT1G13740                  |
| VIT_01s0011g00420     | RPK1 (receptor-like protein kinase 1)                     | AT3G02130                  |
| VIT_01s0011g00550     | Hydrolase, alpha/beta fold family                         | AT1G13820                  |
| VIT_01s0011g00570     | Glucan endo-1,3-beta-glucosidase 3 precursor              | -                          |
| VIT_01s0011g00580     | Pentatricopeptide (PPR) repeat-containing protein         | AT1G26460                  |
| VIT_01s0011g00590     | Acclimation of photosynthesis to environment              | AT5G46110                  |
| VIT_01s0011g00600     | Acclimation of photosynthesis to environment              | AT5G46110                  |
| VIT_02s0012g00820     | Unknown                                                   | -                          |
| VIT_02s0012g00830     | Expansin-like B1                                          | AT4G17030                  |
| VIT_02s0012g00840     | Pentatricopeptide (PPR) repeat-containing protein         | AT1G08070                  |
| VIT_02s0012g00850     | Splicing factor PWI domain-containing protein             | AT1G31870                  |
| VIT_02s0012g00860     | No hit                                                    | -                          |
| VIT_02s0012g00870     | RNA-binding protein 10                                    | AT3G54230                  |
| VIT_02s0012g01950     | Photosystem II protein D1                                 | -                          |
| VIT_02s0012g01960     | Transcription factor jumonji (jmj)                        | AT5G46910                  |
| VIT_02s0012g02190     | Cellulose synthase CSLD2                                  | AT5G16910                  |



|                   |                                              |           |
|-------------------|----------------------------------------------|-----------|
| VIT_02s0012g02200 | No hit                                       | -         |
| VIT_02s0012g02210 | No hit                                       | -         |
| VIT_02s0012g02220 | Xyloglucan endotransglucosylase/hydrolase 30 | AT1G32170 |
| VIT_02s0109g00280 | No hit                                       | -         |
| VIT_02s0109g00290 | CYP76C6                                      | -         |
| VIT_02s0109g00300 | CYP76B1                                      | AT3G61040 |
| VIT_02s0241g00120 | Receptor protein kinase                      | AT4G22730 |
| VIT_02s0241g00130 | No hit                                       | -         |
| VIT_02s0241g00140 | Calmodulin (A)                               | AT1G12310 |
| VIT_02s0241g00150 | No hit                                       | -         |
| VIT_02s0241g00160 | Esterase/lipase/thioesterase family          | AT4G12230 |
| VIT_02s0241g00170 | Zinc finger (C2H2 type) family               | AT4G12240 |
| VIT_03s0017g00760 | E3 ubiquitin-protein ligase HUWE1            | -         |
| VIT_03s0017g00770 | Diacylglycerol kinase 2                      | -         |
| VIT_03s0097g00380 | Monofunctional aspartokinase                 | AT5G13280 |
| VIT_03s0097g00390 | Unknown protein                              | AT1G33780 |
| VIT_03s0110g00180 | No hit                                       | -         |
| VIT_03s0110g00190 | Cytochrome oxidase subunit 1                 | ATMG01360 |
| VIT_03s0110g00200 | Apocytochrome b                              | ATMG00220 |
| VIT_04s0008g03610 | Xylan synthase                               | AT1G27600 |
| VIT_04s0008g03620 | Catalytic                                    | AT5G11560 |
| VIT_04s0008g03630 | Binding                                      | AT5G11550 |
| VIT_04s0008g03640 | FAD-binding domain-containing protein        | AT5G11540 |
| VIT_04s0008g03650 | Embryonic flower 1                           | -         |
| VIT_04s0008g03660 | Embryonic flower 1                           | AT5G11530 |
| VIT_04s0008g03670 | Tesmin/TSO1-like CXC domain-containing       | AT4G29000 |
| VIT_04s0008g06060 | Unknown                                      | -         |
| VIT_04s0008g06070 | Aberrant root formation protein 4 ALF4       | AT5G11030 |
| VIT_04s0008g06080 | Unknown protein                              | AT5G11040 |
| VIT_04s0008g06090 | Pentatricopeptide (PPR) repeat               | AT1G08070 |
| VIT_04s0008g06130 | KNAT2 (knotted1-like homeobox gene 3)        | AT5G25220 |
| VIT_04s0008g06140 | No hit                                       | -         |
| VIT_04s0008g06150 | No hit                                       | -         |
| VIT_04s0008g06160 | Neurochondrin family protein                 | AT4G32050 |
| VIT_04s0008g06170 | Unknown protein                              | AT5G25265 |
| VIT_04s0008g06180 | Histone-lysine N-methyltransferase ATX1      | AT2G31650 |
| VIT_04s0008g06190 | Polyprotein                                  | -         |
| VIT_08s0032g00290 | RNA-binding region RNP-1                     | AT5G32450 |
| VIT_08s0032g00300 | Annexin A3                                   | AT5G12380 |
| VIT_08s0032g00310 | Ubiquitin-conjugating enzyme E2 A            | AT2G02760 |

|                   |                                                      |           |
|-------------------|------------------------------------------------------|-----------|
| VIT_08s0032g00320 | Pigment defective 318 (PDE318)                       | AT1G80770 |
| VIT_08s0032g00330 | Pigment defective 318 (PDE318)                       | AT1G80770 |
| VIT_08s0032g00340 | No hit                                               | -         |
| VIT_08s0032g00350 | No hit                                               | -         |
| VIT_08s0032g00360 | N-6 Adenine-specific DNA methylase                   | AT3G58470 |
| VIT_08s0032g00370 | No hit                                               | -         |
| VIT_08s0032g00380 | Myosin-like protein XIX                              | AT1G08730 |
| VIT_08s0032g00390 | Myosin-like protein                                  | AT1G17580 |
| VIT_08s0032g00400 | Unknown                                              | -         |
| VIT_08s0032g00410 | Myosin-like protein XIX                              | AT5G20490 |
| VIT_08s0032g00420 | Exostosin                                            | AT4G38040 |
| VIT_08s0032g00440 | Syntaxin 1B/2/3/4                                    | AT5G08080 |
| VIT_08s0032g00450 | No hit                                               | -         |
| VIT_08s0032g01110 | Axial regulator YABBY2                               | AT1G08465 |
| VIT_08s0032g01120 | Pentatricopeptide repeat-containing protein          | -         |
| VIT_08s0032g01130 | Caffeic acid methyltransferase                       | AT5G54160 |
| VIT_08s0032g01140 | Unknown protein                                      | AT5G16280 |
| VIT_08s0105g00260 | Digalactosyldiacylglycerol synthase 1                | AT3G11670 |
| VIT_08s0105g00270 | NC domain-containing protein                         | AT5G06370 |
| VIT_08s0105g00280 | Ribosomal protein S8e                                | AT5G06360 |
| VIT_08s0105g00290 | Zinc finger (C3HC4-type ring finger)                 | AT5G01450 |
| VIT_08s0105g00300 | Phospholipase C                                      | AT3G08510 |
| VIT_08s0105g00310 | Rhodanese domain-containing protein                  | AT3G08920 |
| VIT_08s0105g00330 | Enhanced silencing phenotype 4 ESP4 symplekin        | AT5G01400 |
| VIT_08s0105g00340 | NLI interacting factor (NIF)                         | AT3G55960 |
| VIT_08s0105g00350 | DnaJ homolog, subfamily B, member 4                  | AT3G08910 |
| VIT_08s0105g00360 | PHD finger protein alfin                             | AT5G05610 |
| VIT_08s0105g00370 | Myb family                                           | AT2G01060 |
| VIT_08s0105g00380 | Leucoanthocyanidin dioxygenase                       | AT3G11180 |
| VIT_08s0105g00390 | Calcium-dependent protein kinase 13 CPK13            | AT3G51850 |
| VIT_08s0105g00400 | GT-1-like transcription factor                       | AT2G38250 |
| VIT_08s0105g00410 | Transposase, IS4                                     | AT5G41980 |
| VIT_08s0105g00420 | Unknown                                              | -         |
| VIT_08s0105g00430 | Omega-3 fatty acid desaturase, chloroplast precursor | AT5G05580 |
| VIT_08s0105g00440 | Selenoprotein                                        | AT5G58640 |
| VIT_08s0105g00450 | Transducin protein                                   | AT5G05570 |
| VIT_08s0105g00460 | Acyl-CoA oxidase (ACX4)                              | AT3G51840 |
| VIT_09s0002g00230 | Pentatricopeptide (PPR) repeat-containing protein    | AT3G18020 |
| VIT_09s0002g00260 | Unknown protein                                      | -         |
| VIT_09s0002g00280 | Ubiquitin-conjugating enzyme E2 J2                   | AT5G50430 |

|                   |                                                        |           |
|-------------------|--------------------------------------------------------|-----------|
| VIT_09s0002g00300 | APUM23 (Arabidopsis PUMILIO 23)                        | AT1G72320 |
| VIT_09s0002g00310 | ATP synthase CF0 A subunit                             | AT5G60390 |
| VIT_09s0002g00320 | Pectinesterase PME3                                    | AT3G14310 |
| VIT_09s0002g00330 | Pectinesterase PME1                                    | AT1G53840 |
| VIT_10s0003g04520 | No hit                                                 | -         |
| VIT_10s0003g04530 | Cation: chloride symporter                             | AT1G30450 |
| VIT_10s0042g00010 | Strictosidine synthase                                 | -         |
| VIT_10s0042g00020 | Strictosidine synthase                                 | AT3G57030 |
| VIT_10s0042g00720 | ATP-dependent RNA helicase                             | -         |
| VIT_10s0042g00760 | No hit                                                 | -         |
| VIT_10s0042g00770 | Leucine-rich repeat receptor-like protein kinase 1     | AT4G08850 |
| VIT_10s0042g00780 | Gag-pol polyprotein                                    | -         |
| VIT_10s0042g00790 | Unknown                                                | -         |
| VIT_10s0042g00800 | Proteasome 26S regulatory subunit (RPN2)               | AT2G32730 |
| VIT_10s0042g00950 | Succinyl-CoA ligase alpha 1 subunit                    | AT5G23250 |
| VIT_10s0042g00960 | DNAJ heat shock N-terminal domain-containing protein   | AT5G23240 |
| VIT_10s0092g00470 | SHR5-receptor-like kinase                              | AT1G56130 |
| VIT_10s0092g00480 | CYP71D10p                                              | AT3G26330 |
| VIT_10s0092g00490 | CYP71A12                                               | -         |
| VIT_10s0092g00500 | CYP71D10                                               | AT5G25120 |
| VIT_10s0092g00510 | CYP71D10p                                              | AT3G26310 |
| VIT_10s0092g00520 | Leucine-rich repeat family                             | -         |
| VIT_10s0092g00560 | Transducin protein                                     | AT2G16405 |
| VIT_10s0092g00570 | Leucine-rich repeat family                             | AT1G56140 |
| VIT_10s0092g00580 | No hit                                                 | -         |
| VIT_10s0092g00590 | Leucine-rich repeat family                             | AT1G56140 |
| VIT_10s0092g00690 | Cysteine-rich receptor-like protein kinase 8           | AT4G23160 |
| VIT_10s0092g00780 | F-type H <sup>+</sup> -transporting ATPase alpha chain | ATMG01190 |
| VIT_10s0092g00790 | Ribosomal protein S19                                  | -         |
| VIT_11s0016g01710 | Myosin-like protein XIX                                | AT5G20490 |
| VIT_11s0016g01720 | Threonine synthase                                     | AT4G29840 |
| VIT_11s0016g01730 | VIP3 (vernalization independence 3)                    | AT4G29830 |
| VIT_11s0016g01740 | Zinc finger (C2H2 type) family                         | AT2G19385 |
| VIT_11s0016g01750 | Unknown protein                                        | AT4G26060 |
| VIT_11s0016g01760 | Cleavage and polyadenylation specificity factor 5      | AT4G29820 |
| VIT_11s0016g01770 | MKK2                                                   | AT4G29810 |
| VIT_11s0016g01780 | HAB1 (homology toABI1)                                 | AT1G72770 |
| VIT_11s0016g01790 | Unknown protein                                        | AT4G29790 |
| VIT_11s0016g01800 | Protein kinase MK6                                     | AT4G33080 |
| VIT_11s0016g01810 | Unknown protein                                        | AT5G12010 |

|                   |                                                                    |           |
|-------------------|--------------------------------------------------------------------|-----------|
| VIT_11s0016g01820 | Lactoylglutathione lyase                                           | AT5G57040 |
| VIT_11s0016g01830 | Protein kinase                                                     | AT2G19410 |
| VIT_11s0016g01840 | No hit                                                             | -         |
| VIT_11s0016g01850 | Anthocyanidin-3-glucoside rhamnosyltransferase                     | AT5G49690 |
| VIT_11s0016g01860 | RPS2 (resistant to <i>p. syringae</i> 2)                           | AT4G26090 |
| VIT_11s0016g01870 | Dihydrolipoamide S-acetyltransferase                               | AT1G54220 |
| VIT_11s0016g01890 | Telomere repeat binding factor 1                                   | AT1G72740 |
| VIT_11s0016g01900 | N-MYRISTOYLtransferase                                             | AT5G57020 |
| VIT_11s0016g01910 | THO complex subunit 6                                              | AT2G19430 |
| VIT_11s0016g01920 | EIF-4A3                                                            | AT1G54270 |
| VIT_11s0016g01930 | Diacylglycerol acyltransferase                                     | AT2G19450 |
| VIT_11s0016g01940 | Unknown protein                                                    | AT2G19460 |
| VIT_11s0016g01950 | Casein kinase I delta                                              | AT1G72710 |
| VIT_11s0016g02380 | 1-aminocyclopropane-1-carboxylate oxidase 2 (ACO1)                 | AT2G19590 |
| VIT_11s0016g02400 | K <sup>+</sup> efflux antiporter (KEA4)                            | AT2G19600 |
| VIT_11s0016g02410 | MYB divaricata                                                     | AT5G56840 |
| VIT_11s0016g02420 | UDP-N-acetylglucosamine O-acyltransferase protein                  | AT4G29540 |
| VIT_11s0016g02430 | Dual-specific kinase DSK1                                          | AT3G13690 |
| VIT_11s0016g03130 | Ceramide glucosyltransferase                                       | AT2G19880 |
| VIT_11s0016g03140 | ERD7 (EARLY-responsive TO dehydration 7)                           | AT3G21600 |
| VIT_11s0016g03150 | TRNA a64-2'-o-ribosylphosphate transferase                         | AT2G40570 |
| VIT_11s0016g03160 | ABC transporter B member 11                                        | AT3G28345 |
| VIT_11s0016g03170 | Arabidopsis histidine phosphotransfer AHP4                         | AT3G16360 |
| VIT_11s0016g03180 | ABI1 (ABA insensitive 1)                                           | AT4G26080 |
| VIT_11s0037g01210 | Eceriferum 1 (CER1 protein) Sterol desaturase                      | AT5G57800 |
| VIT_11s0052g00160 | ATP binding, related                                               | AT4G29920 |
| VIT_11s0052g00170 | Armadillo-like helical domain-containing                           | AT3G28430 |
| VIT_12s0055g01150 | Brassinosteroid insensitive 1-associated receptor kinase 1         | AT4G33430 |
| VIT_12s0028g00920 | Glutathione S-transferase 9 GSTF9                                  | AT2G30860 |
| VIT_12s0028g00930 | Glutathione S-transferase 9 GSTF9                                  | AT2G30860 |
| VIT_12s0028g00940 | Electron transfer flavoprotein alpha-subunit precursor (Alpha-ETF) | AT1G06660 |
| VIT_12s0028g00960 | Phytoene synthase, chloroplast precursor                           | AT5G17230 |
| VIT_12s0028g00980 | Myb family                                                         | AT2G40260 |
| VIT_12s0028g01000 | Unknown protein                                                    | AT4G19645 |
| VIT_12s0028g01010 | Unknown                                                            | -         |
| VIT_12s0028g01020 | No hit                                                             | -         |
| VIT_12s0028g01030 | Unknown                                                            | -         |
| VIT_12s0028g01040 | Protein kinase                                                     | AT3G57750 |
| VIT_12s0028g01050 | Helicase in vascular tissue and TAPETUM                            | AT2G30800 |
| VIT_12s0028g01060 | No hit                                                             | -         |

|                   |                                                              |           |
|-------------------|--------------------------------------------------------------|-----------|
| VIT_12s0028g01070 | WD-repeat protein 26                                         | AT5G08560 |
| VIT_12s0028g01080 | Photosystem II oxygen-evolving complex precursor, 23kda PSBP | AT1G06680 |
| VIT_12s0028g01090 | Reticulon family protein (RTNLB5)                            | AT3G10260 |
| VIT_12s0028g01100 | Aldo/keto reductase                                          | AT1G06690 |
| VIT_12s0028g01110 | Phytochrome- interacting factor 5 PIL6                       | AT2G43010 |
| VIT_12s0028g01120 | Amine oxidase                                                | AT2G43020 |
| VIT_12s0028g01130 | No hit                                                       | -         |
| VIT_12s0028g01140 | Pentatricopeptide (PPR) repeat-containing protein            | AT3G59040 |
| VIT_12s0055g00750 | Pentatricopeptide (PPR) repeat-containing protein            | AT3G62470 |
| VIT_12s0055g00760 | No hit                                                       | -         |
| VIT_12s0055g00770 | SWAP (Suppressor-of-White-APricot)                           | AT4G31200 |
| VIT_12s0055g00780 | VPS20.2 SNF7                                                 | AT5G09260 |
| VIT_12s0055g00790 | Clathrin assembly protein 3                                  | AT4G02650 |
| VIT_12s0055g00800 | Arachidonic acid-induced DEA1                                | AT1G12090 |
| VIT_12s0055g00810 | Cationic peroxidase                                          | AT4G25980 |
| VIT_12s0055g00820 | Serine carboxypeptidase II                                   | AT5G42240 |
| VIT_12s0055g00830 | Methyltransferase                                            | AT3G26410 |
| VIT_12s0055g00840 | Sucrose-6-phosphate phosphatase                              | AT2G35840 |
| VIT_12s0055g00850 | Nodulin                                                      | AT3G43660 |
| VIT_12s0055g00860 | Nodulin                                                      | AT1G76800 |
| VIT_12s0055g00870 | Nodulin                                                      | AT1G76800 |
| VIT_12s0055g00890 | No hit                                                       | -         |
| VIT_12s0055g00900 | RAE1 RNA export 1 homolog                                    | AT1G80670 |
| VIT_12s0055g00910 | Kelch repeat-containing F-box protein                        | AT1G22040 |
| VIT_12s0055g00920 | Aspartate aminotransferase                                   | AT2G13810 |
| VIT_12s0055g00930 | Heavy-metal-associated domain-containing protein             | AT2G28660 |
| VIT_12s0055g00940 | Sulfate transporter 1.2                                      | AT1G78000 |
| VIT_12s0055g00950 | Receptor-like kinase 902                                     | AT2G26730 |
| VIT_12s0055g00960 | Unknown                                                      | -         |
| VIT_12s0055g00970 | Pentatricopeptide repeat                                     | AT2G15630 |
| VIT_12s0055g00980 | Peroxidase precursor                                         | AT5G39580 |
| VIT_12s0055g00990 | Peroxidase                                                   | AT5G64120 |
| VIT_12s0055g01000 | Peroxidase                                                   | AT5G39580 |
| VIT_12s0055g01010 | Peroxidase                                                   | AT5G64120 |
| VIT_12s0055g01020 | Peroxidase                                                   | AT5G39580 |
| VIT_12s0055g01030 | Peroxidase                                                   | AT5G64120 |
| VIT_12s0057g00980 | Phytochrome defective C (PHYC)                               | AT5G35840 |
| VIT_14s0066g00920 | Polyribonucleotide nucleotidyltransferase                    | AT5G14580 |
| VIT_14s0066g00950 | Isocitrate dehydrogenase, chloroplast precursor              | AT5G14590 |
| VIT_14s0066g00960 | Glutaredoxin                                                 | AT5G40370 |

|                   |                                                               |           |
|-------------------|---------------------------------------------------------------|-----------|
| VIT_14s0066g00970 | Anthranilate phosphoribosyltransferase, chloroplast precursor | AT5G17990 |
| VIT_14s0066g00980 | Unknown protein                                               | AT5G62960 |
| VIT_14s0066g00990 | TRNA methyltransferase complex GCD14 subunit                  | AT5G14600 |
| VIT_14s0066g01000 | Phosphate/phosphoenolpyruvate translocator                    | AT3G01550 |
| VIT_14s0066g01010 | Myb domain protein 98                                         | AT4G18770 |
| VIT_14s0066g01020 | DEAD box RNA helicase 1                                       | AT3G01540 |
| VIT_14s0066g01030 | Tubulin gamma complex component 2                             | AT5G17410 |
| VIT_14s0066g01040 | Cytosine methyltransferase (DRM2)                             | AT5G14620 |
| VIT_14s0066g01050 | Glycogen synthase kinase 3 beta                               | AT5G14640 |
| VIT_14s0066g01060 | Polygalacturonase GH28                                        | AT5G14650 |
| VIT_14s0066g01070 | Peptide deformylase, chloroplast precursor                    | AT5G14660 |
| VIT_14s0066g01080 | ADP-ribosylation factor A1B                                   | AT5G14670 |
| VIT_14s0066g01090 | Myb domain protein 24                                         | AT5G40350 |
| VIT_14s0066g01100 | Monodehydroascorbate reductase, cytoplasmic isoform 2         | AT3G27820 |
| VIT_14s0066g01110 | Ribosomal protein L12-1, chloroplast (CL12-A) 50S             | AT3G27830 |
| VIT_14s0066g01120 | PWWP domain-containing protein                                | AT5G40340 |
| VIT_14s0066g01130 | Universal stress protein A                                    | AT5G14680 |
| VIT_14s0066g01140 | Unknown protein                                               | -         |
| VIT_14s0066g01150 | Cinnamoyl-CoA reductase                                       | AT5G14700 |
| VIT_14s0066g01160 | Unknown protein                                               | AT5G14710 |
| VIT_14s0066g01170 | MAP4K alpha1                                                  | AT5G14720 |
| VIT_14s0066g01180 | Phospholipid-transporting ATPase                              | AT3G27870 |
| VIT_14s0066g01190 | Unknown protein                                               | AT3G27880 |
| VIT_14s0066g01200 | Protein kinase beta-1 subunit 5'-AMP-activated                | AT3G01510 |
| VIT_14s0066g01210 | Carbonic anhydrase, chloroplast precursor                     | AT3G01500 |
| VIT_14s0066g01380 | Calcium homeostasis regulator CHoR1                           | AT3G55250 |
| VIT_14s0066g01390 | Metal-dependent phosphohydrolase HD domain-containing protein | AT5G40270 |
| VIT_14s0066g01590 | NHL repeat-containing protein                                 | AT1G70280 |
| VIT_14s0066g01600 | NHL repeat-containing protein                                 | AT5G14890 |
| VIT_14s0066g01610 | Zinc finger (C3HC4-type ring finger)                          | AT5G40250 |
| VIT_14s0066g01620 | Hypoxia-responsive                                            | AT3G48030 |
| VIT_14s0066g01630 | UVH3 (ultraviolet hypersensitive 3)                           | AT3G28030 |
| VIT_14s0066g01640 | Nodulin MtN21 family                                          | AT5G40230 |
| VIT_14s0066g01650 | Nodulin MtN21 family                                          | AT3G28050 |
| VIT_14s0066g01660 | DegP protease                                                 | AT5G40200 |
| VIT_14s0066g01670 | Alpha-dioxygenase                                             | AT3G01420 |
| VIT_14s0066g01680 | No hit                                                        | -         |
| VIT_14s0066g01690 | Pathogen-inducible alpha-dioxygenase                          | AT3G01420 |
| VIT_14s0066g01700 | Calmodulin binding protein                                    | AT5G40190 |
| VIT_14s0066g01710 | Leaf senescence protein                                       | AT3G28150 |

|                   |                                                           |           |
|-------------------|-----------------------------------------------------------|-----------|
| VIT_14s0066g01720 | Bromo-adjacency (BAH) domain-containing protein           | AT3G48050 |
| VIT_14s0066g01730 | Cellulose synthase CSLC04                                 | AT3G28180 |
| VIT_14s0066g01740 | Unknown protein                                           | AT1G22270 |
| VIT_14s0066g01840 | SAG101 (senescence-associated gene 101)                   | AT5G14930 |
| VIT_18s0001g14060 | Transposon protein, CACTA, En/Spm sub-class               | AT3G11290 |
| VIT_18s0001g14070 | Unknown                                                   | -         |
| VIT_18s0001g14080 | Diphthine synthase (DPH5)                                 | AT4G31790 |
| VIT_18s0001g14400 | Peptidyl-prolyl cis-trans isomerase ROC5 (rotamase CYP 5) | AT4G34870 |
| VIT_18s0001g14410 | Unknown protein                                           | AT1G30755 |
| VIT_18s0001g14420 | Unknown                                                   | -         |
| VIT_18s0001g14430 | Unknown                                                   | -         |
| VIT_18s0001g14440 | Molecular chaperone DnaJ                                  | AT4G36040 |
| VIT_18s0001g14450 | Ferredoxin: nadp+ Oxidoreductase PETH                     | AT5G66190 |
| VIT_18s0001g14620 | Ribosomal protein S16                                     | -         |
| VIT_18s0001g14630 | ATSYTB/NTMC2T1.2/NTMC2TYPE1.2/SYTB                        | AT1G20080 |
| VIT_18s0001g14640 | No hit                                                    | -         |
| VIT_18s0001g14650 | DNA-directed RNA polymerase I subunit A12                 | -         |
| VIT_18s0001g14660 | P-glycoprotein 13                                         | AT1G27940 |
| VIT_18s0001g14670 | Rac-like GTP-binding protein RAC1                         | AT1G75840 |
| VIT_18s0001g14680 | Vacuolar protein sorting 35                               | AT1G75850 |
| VIT_18s0001g14690 | Protein kinase                                            | AT1G77280 |
| VIT_18s0001g14700 | Unknown                                                   | -         |
| VIT_18s0001g14710 | Ketol-acid reductoisomerase precursor                     | AT3G58610 |
| VIT_18s0001g14720 | Ankyrin repeat family protein                             | -         |
| VIT_18s0001g14730 | Glutaredoxin                                              | AT5G42150 |
| VIT_18s0001g14740 | Protein binding                                           | -         |
| VIT_18s0001g14860 | SKP1                                                      | AT5G42190 |
| VIT_18s0001g14870 | Subtilisin-type protease precursor                        | AT1G20160 |
| VIT_18s0001g14880 | Unknown protein                                           | AT4G22000 |
| VIT_18s0001g14890 | ABA-responsive element-binding protein 3 (AREB3)          | -         |
| VIT_18s0001g14900 | La domain-containing protein                              | AT4G35890 |
| VIT_18s0001g14910 | Mannitol dehydrogenase                                    | AT4G39330 |
| VIT_18s0001g14920 | Unknown protein                                           | AT1G20180 |
| VIT_18s0001g14930 | Unknown protein                                           | AT1G75980 |
| VIT_18s0001g14940 | Pentatricopeptide (PPR) repeat-containing                 | AT3G26540 |
| VIT_18s0001g14950 | EMB2170 (embryo defective 2170)                           | AT1G76980 |
| VIT_18s0001g14960 | Pentatricopeptide (PPR) repeat-containing                 | AT1G77010 |
| VIT_18s0001g14970 | Pentatricopeptide (PPR) repeat-containing                 | AT1G43980 |
| VIT_18s0001g14980 | 3-methyl-2-oxobutanoate dehydrogenase                     | AT1G21400 |
| VIT_18s0001g14990 | Dual-specific kinase DSK1                                 | AT3G13690 |

|                   |                                                           |           |
|-------------------|-----------------------------------------------------------|-----------|
| VIT_18s0001g15000 | ACT domain containing protein (ACR4)                      | AT1G76990 |
| VIT_18s0001g15010 | F-box and leucine-rich repeat protein 1                   | AT1G77000 |
| VIT_18s0001g15020 | DnaJ homolog, subfamily A, member 4                       | AT1G77020 |
| VIT_18s0001g15050 | Protein phosphatase 2C                                    | AT1G43900 |
| VIT_18s0001g15190 | flavin-containing monooxygenase, putative                 | AT1G48910 |
| VIT_18s0001g15200 | SIK1 (serine/threonine kinase 1)                          | -         |
| VIT_18s0001g15220 | Unknown protein                                           | AT1G31130 |
| VIT_18s0001g15230 | Unknown                                                   | -         |
| VIT_18s0001g15240 | Blue (type 1) copper domain                               | AT2G02850 |
| VIT_18s0001g15250 | Unknown                                                   | -         |
| VIT_18s0001g15260 | Myb domain protein 52                                     | AT1G17950 |
| VIT_18s0001g15270 | SCL1 (scarecrow-like 1)                                   | AT1G21450 |
| VIT_18s0001g15280 | RNA exonuclease 1                                         | AT5G25800 |
| VIT_18s0001g15290 | Ribosome maturation protein SDO1                          | AT1G43860 |
| VIT_18s0001g15300 | No hit                                                    | -         |
| VIT_18s0001g15310 | Thioredoxin M-type                                        | AT3G15360 |
| VIT_18s0001g15320 | SEU3B protein                                             | AT1G43850 |
| VIT_18s0001g15330 | SWEET1                                                    | AT1G21460 |
| VIT_18s0001g15340 | Pentatricopeptide (PPR) repeat-containing protein         | -         |
| VIT_18s0001g15350 | Pentatricopeptide (PPR) repeat-containing protein         | AT3G21470 |
| VIT_18s0001g15360 | Thylakoid lumenal 29.8 kDa protein                        | AT1G77090 |
| VIT_18s0001g15370 | Exostosin family protein                                  | AT1G21480 |
| VIT_18s0001g15380 | No hit                                                    | -         |
| VIT_18s0001g15390 | Gaiacol peroxidase                                        | AT4G25980 |
| VIT_18s0001g15400 | KOW domain-containing transcription factor family protein | AT4G08350 |
| VIT_18s0001g15410 | Alcohol dehydrogenase 1                                   | AT1G77120 |
| VIT_18s0001g15420 | Auxin efflux carrier protein 6                            | AT1G77110 |
| VIT_18s0001g15430 | Alliin lyase                                              | -         |
| VIT_18s0001g15450 | Alcohol dehydrogenase 3                                   | AT1G77120 |
| VIT_18s0001g15460 | Stearyl acyl carrier protein desaturase                   | AT1G43800 |
| VIT_18s0001g15470 | Leaf senescence related protein-like                      | AT1G48880 |
| VIT_18s0001g15510 | Unknown                                                   | -         |
| VIT_18s0001g15520 | Leaf senescence protein                                   | AT1G48880 |
| VIT_18s0001g15530 | Pentatricopeptide (PPR) repeat-containing                 | AT3G09040 |
| VIT_18s0001g15620 | Receptor kinase TRKe                                      | AT3G47090 |
| VIT_18s0001g15630 | MAP kinase activating protein                             | AT1G77220 |
| VIT_18s0001g15640 | Pathogenesis-related                                      | AT1G78780 |
| VIT_18s0001g15650 | Pathogenesis related protein                              | AT1G78780 |
| VIT_18s0001g15660 | Pathogen-related                                          | AT1G78780 |
| VIT_18s0001g15670 | Cytoplasm protein                                         | AT1G21370 |



|                   |                                          |           |
|-------------------|------------------------------------------|-----------|
| VIT_18s0001g15680 | Cellulase                                | AT4G24260 |
| VIT_18s0001g15690 | Endo-1,4-beta-glucanase                  | -         |
| VIT_18s0001g15700 | GLTP3 (glycolipid transfer protein 3)    | AT3G21260 |
| VIT_18s0001g15710 | Electron carrier/ oxidoreductase         | AT1G21350 |
| VIT_18s0001g15720 | Leucine Rich Repeat receptor-like kinase | AT3G24240 |
| VIT_18s0001g15730 | Dof zinc finger protein DOF3.5           | AT3G52440 |
| VIT_18s0001g15740 | No hit                                   | -         |
| VIT_18s0001g15750 | Protein kinase Xa21                      | AT3G47110 |
| VIT_18s0001g15760 | Copine BON3 (BONZAI 3)                   | -         |

---

**Table S3** Significantly enriched functional categories for genes identified in sweep regions by CLR analysis of *vinifera* candidate genes, based on VitisNet functional annotations

| Functional category                             | <i>P</i> value | Count in category | Count in comparison |
|-------------------------------------------------|----------------|-------------------|---------------------|
| Actin-driven movement                           | 1.38E-04       | 4                 | 26                  |
| Abiotic stress response                         | 2.53E-04       | 6                 | 85                  |
| Plant-pathogen interaction                      | 5.07E-04       | 11                | 318                 |
| Nudix hydrolase family                          | 2.64E-03       | 3                 | 27                  |
| Alcohol dehydrogenase superfamily               | 4.31E-03       | 3                 | 32                  |
| Monoterpenoid indole alkaloid biosynthesis      | 4.84E-03       | 4                 | 66                  |
| Flower development                              | 5.43E-03       | 7                 | 204                 |
| Ribosome organization and biogenesis            | 5.94E-03       | 5                 | 111                 |
| Peroxisome membrane organization and biogenesis | 8.88E-03       | 2                 | 14                  |

**Table S4** Significantly enriched functional categories for genes identified in sweep regions by CLR analysis of *sylvestris* candidate genes, based on VitisNet functional annotations

| Functional category                 | <i>P</i> value | Count in category | Count in comparison |
|-------------------------------------|----------------|-------------------|---------------------|
| Stilbenoid biosynthesis             | 1.93E-50       | 24                | 45                  |
| Phytoalexin biosynthesis            | 1.12E-44       | 24                | 69                  |
| Phenylpropanoid biosynthesis        | 1.13E-34       | 26                | 224                 |
| ERF subfamily transcription factor  | 3.04E-10       | 7                 | 56                  |
| Ethylene-mediated Signaling pathway | 8.76E-06       | 7                 | 248                 |
| Flavonoid biosynthesis              | 6.27E-03       | 3                 | 127                 |

**Table S5** Functional categories were assigned to all candidate genes under selection detected by  $F_{ST}$  between wild and cultivated samples using the VitisNet functional annotations

| Functional category                         | <i>P</i> value | Count in category | Count in comparison |
|---------------------------------------------|----------------|-------------------|---------------------|
| HSP-mediated protein folding                | 2.08E-20       | 34                | 146                 |
| Protein processing in endoplasmic reticulum | 2.75E-12       | 31                | 222                 |
| AS2 family transcription factor             | 1.59E-09       | 13                | 48                  |
| Temperature stress response                 | 5.41E-06       | 11                | 66                  |
| Glycosyl transference                       | 1.68E-05       | 11                | 74                  |
| Cytokinin inactivation by glycosylation     | 3.18E-05       | 6                 | 21                  |
| Subtilase-mediated proteolysis              | 4.09E-05       | 13                | 111                 |
| Flavin-containing monooxygenase             | 1.74E-04       | 7                 | 39                  |
| Metabolism single reactions                 | 2.64E-04       | 15                | 169                 |
| MYB family transcription factor             | 8.30E-04       | 14                | 169                 |
| GRAS family transcription factor            | 8.40E-04       | 7                 | 50                  |
| Folate biosynthesis                         | 2.82E-03       | 2                 | 3                   |
| Salicylic acid biosynthesis                 | 2.82E-03       | 2                 | 3                   |
| Nucleic acid catabolism                     | 3.03E-03       | 3                 | 10                  |

**Table S6** Gene expression analysis of genes within the sex determination region. The genes are listed with their functions. Comparisons in expression between sexes (M = male, F=female, H=hermaphrodite) are colored when significant, with the higher expressed sex indicated. Non-colored cells indicate results that were significant but not after multiple test correction. The two  $F_{ST}$  peaks are defined in the text.

| Gene ID           | Peak | Functional_annotation                                        | M vs. F                              | M vs H | F vs. H |
|-------------------|------|--------------------------------------------------------------|--------------------------------------|--------|---------|
| VIT_02s0154g00110 | 1#   | Trehalose-6-phosphate phosphatase (AtTPPA)                   | F                                    | H      | -       |
| VIT_02s0154g00120 | 1#   | Unknown                                                      | -                                    | -      | -       |
| VIT_02s0154g00130 | 1#   | Exostosin (Xyloglucan galactosyltransferase KATAMARI 1)      | F                                    | -      | F       |
| VIT_02s0154g00140 | 1#   | 3-oxoacyl-[acyl-carrier-protein] synthase 3 A, cpl precursor | F                                    | -      | F       |
| VIT_02s0154g00150 | 1#   | PLATZ transcription factor                                   | -                                    | M      | -       |
| VIT_02s0154g00160 | 1#   | FMO family protein                                           | F                                    | -      | F       |
| VIT_02s0154g00170 | 1#   | flavin-containing monooxygenase 3                            | F                                    | -      | F       |
| VIT_02s0154g00180 | 1#   | flavin-containing monooxygenase 3                            | -                                    | -      | -       |
| VIT_02s0154g00190 | 1#   | flavin-containing monooxygenase 3                            | F                                    | H      | F       |
| VIT_02s0154g00200 | 1#   | Unknown protein                                              | F                                    | -      | F       |
| VIT_02s0154g00210 | 1#   | WRKY DNA-binding protein 21                                  | -                                    | -      | -       |
| VIT_02s0154g00220 | 1#   | Zinc finger (C2H2 type) family                               | -                                    | -      | -       |
| VIT_02s0154g00230 | 2#   | Phosphatidic acid phosphatase / PAP2                         | -                                    | M      | -       |
| VIT_02s0154g00240 | 2    | Oxysterol binding protein                                    | -                                    | -      | -       |
| VIT_02s0154g00250 | 2    | Oxysterol binding protein                                    | -                                    | -      | -       |
| VIT_02s0154g00260 | 2    | Nitrate transporter                                          | F                                    | -      | -       |
| VIT_02s0154g00270 | 2    | No hit                                                       | -                                    | -      | -       |
| VIT_02s0154g00280 | 2    | Arachidonic acid-induced DEA1                                | -                                    | -      | -       |
| VIT_02s0154g00290 | 2    | Extensin                                                     | -                                    | -      | -       |
| VIT_02s0154g00300 | 2#   | Small nuclear ribonucleoprotein Sm D3                        | -                                    | -      | -       |
| VIT_02s0154g00310 | 2#   | Protease inhibitor/seed storage/lipid transfer protein (LTP) | -                                    | H      | H       |
| VIT_02s0154g00320 | 2#   | Protease inhibitor/seed storage/lipid transfer protein (LTP) | -                                    | -      | -       |
| VIT_02s0154g00330 | 2#   | Unknown protein                                              | -                                    | -      | -       |
| VIT_02s0154g00340 | 2#   |                                                              | Not detected as expressed in flowers |        |         |
| VIT_02s0154g00350 | 2#   | L-lactate dehydrogenase A                                    | -                                    | -      | H       |
| VIT_02s0154g00360 | 2#   | No hit                                                       | -                                    | M      | -       |
| VIT_02s0154g00370 | 2#   | YbaK/prolyl-tRNA synthetase associated region                | M                                    | M      | -       |
| VIT_02s0154g00380 | 2#   | Unknown                                                      | F                                    | -      | F       |
| VIT_02s0154g00390 | 2#   | Autophagy 8f (APG8f)                                         | -                                    | H      | -       |
| VIT_02s0154g00400 | 2#   | Scarecrow transcription factor 6 (SCL6)                      | -                                    | M      | -       |

|                   |    |                                                      |                                      |   |   |
|-------------------|----|------------------------------------------------------|--------------------------------------|---|---|
| VIT_02s0154g00420 | 2# |                                                      | Not detected as expressed in flowers |   |   |
| VIT_02s0154g00430 | 2# |                                                      | Not detected as expressed in flowers |   |   |
| VIT_02s0154g00410 | 2# | Unknown protein                                      | -                                    | M | F |
| VIT_02s0154g00440 | 2# | Unknown protein                                      | -                                    | - | - |
| VIT_02s0154g00450 | 2# | Zinc knuckle                                         | -                                    | M | - |
| VIT_02s0154g00460 | 2# | Unknown protein                                      | -                                    | - | - |
| VIT_02s0154g00470 | 2# | No hit                                               | -                                    | - | - |
| VIT_02s0154g00480 | 2# | Heat shock protein MTSHP                             | -                                    | H | H |
| VIT_02s0154g00490 | 2# | Heat shock 22 kDa protein mitochondrial              | -                                    | - | - |
| VIT_02s0154g00500 | 2# | VAP27-1 (VAMP/synaptobrevin-associated protein 27-1) | -                                    | M | - |
| VIT_02s0154g00510 | 2# | SEC14 cytosolic factor                               | -                                    | - | H |
| VIT_02s0154g00520 | 2# | Aspartyl protease                                    | -                                    | - | - |
| VIT_02s0154g00530 | 2# | Histidine triad nucleotide binding protein 3         | -                                    | - | - |
| VIT_02s0154g00540 | 2# | Protein arginine N-methyltransferase                 | -                                    | M | - |
| VIT_02s0154g00550 | 2# | DnaJ homolog, subfamily C, member 11                 | -                                    | - | - |

#, with top 0.5%  $D_{xy}$  values

**Table S7** Functional categories were assigned to all candidate genes under selection detected by  $F_{ST}$  between wine and table grapes using the VitisNet functional annotations

| Functional category                        | <i>P</i> value | Count in category | Count in comparison |
|--------------------------------------------|----------------|-------------------|---------------------|
| Serine catabolism                          | 1.08E-10       | 6                 | 6                   |
| Development Senescence                     | 1.29E-07       | 9                 | 39                  |
| Amino acid catabolism                      | 6.14E-06       | 10                | 76                  |
| Valine, leucine, and isoleucine metabolism | 1.04E-05       | 3                 | 3                   |
| LUG family transcription factor            | 1.48E-05       | 4                 | 8                   |
| Methane metabolism                         | 2.24E-04       | 10                | 115                 |
| Transcriptional co-repression              | 3.36E-04       | 4                 | 16                  |
| Alcohol dehydrogenase superfamily          | 6.11E-04       | 5                 | 32                  |
| Transcription factor MTERF                 | 9.33E-04       | 5                 | 35                  |
| Glycerolipid catabolism                    | 3.07E-03       | 4                 | 28                  |
| Fatty acid metabolism                      | 4.95E-03       | 6                 | 72                  |
| Phenylalanine biosynthesis                 | 4.97E-03       | 11                | 201                 |
| Pentatricopeptide domain family            | 5.14E-03       | 21                | 515                 |
| CPP family transcription factor            | 9.34E-03       | 2                 | 7                   |
